# Supplementary material for: Epigenetic Regulation by Chromatin Activation Mark H3K4me3 in Primate Progenitor Cells within Adult Neurogenic Niche
Source: PubMed Central journal article supplement — Sci Rep. 2014 Jun 20;4:5371. doi: 10.1038/srep05371 (PMC4064326; doi:10.1038/srep05371), 2014-06-20
Supplement: srep05371-s1.pdf [file srep05371-s1.pdf]

## **Epigenetic Regulation by Chromatin Activation Mark H3K4me3 in Primate Progenitor Cells within Adult Neurogenic Niche**

Richard S. Sandstrom<sup>1</sup>, Michael R. Foret<sup>2</sup>, Douglas A. Grow<sup>2,3</sup>, Eric Haugen<sup>1</sup>, Christopher T. Rhodes<sup>2</sup>, Astrid E. Cardona<sup>2</sup>, Clyde F. Phelix<sup>2</sup>, Yufeng Wang<sup>2</sup>, Mitchel S. Berger<sup>4</sup>, and Chin-Hsing Annie Lin<sup>2,3\*</sup>

**Supplemental Figure 1.** Chromatin activation mark H3K4me3 is expressed in the SVZ cell lineages of mouse brain. (A-D) Double labeling of H3K4me3 (red) and NSC marker- GFAP (A, B) as well as other lineage-specific markers showed H3K4me3 co-expressing with Mash1 (C), PSA-NCAM (E), DCX (F), and Double-labeling of EdU and H3K4me3 in SVZ (D). Double-labeled cells were marked by arrows. (G, H) Antimitotic treatment abolished most of the H3K4me3 expressing cells in adult SVZ (H), whereas H3K4me3-positive cells were retained in saline control (G). LV: lateral ventricle; CC: Corpus Callosum; Str: Striatum (12 $\mu$  coronal sections; 40X oil; scale bar= 50  $\mu$ m).

**Supplemental Figure 2.** Network and Pathway analyses by IPA for H3K4me3 enriched genes in baboon SVZ cells. The top canonical pathways and networks were predicted by the Ingenuity Pathway Analysis software. The shaded focus genes (red highlight) were enriched with H3K4me3 identified by ChIP-Seq analysis. The node shape reflects the role of each element in the network and the direction and arrowhead shapes of each edge represent different types of interactions (see the key at left panel). (A) Post-translational modifications; (B) Network in Nervous System Development and Function; (C) Molecular transport.

**Supplemental Figure 3.** Network and Pathway analyses by IPA for H3K4me3 enriched genes in baboon SVZ cells. (A) Metabolism. (B) RNA post-transcriptional modification

**Supplemental Figure 4.** Network and Pathway analyses by IPA for H3K4me3 enriched genes in baboon SVZ cells highlight the Pathway related to Molecular Mechanisms of Cancer.

**Supplemental Figure 5.** Network and Pathway analyses for H3K4me3 enriched genes in baboon SVZ cells highlight the pathway of eIF4 signaling and ribosomal biogenesis.

**Supplemental Figure 6.** Venn diagram displays the differential and shared targets of H3K4me3 in the purified NSC (neural stem cell) versus NB (neuroblast) populations. The statistically overrepresented GO terms for each shared and unique targets are shown in the “box”.

**Supplemental Table 1:**

Summary of H3K4me3-enriched genes in the Baboon SVZ (i<sub>a-f</sub>) NSCs; (ii<sub>a,b</sub>) neuroblasts (NB); (iii<sub>a-f</sub>) Total progenitors (NSC and NB); (iv<sub>a-d</sub>) overlap comparison between NSC and NB populations; (v<sub>a,b</sub>) Gene Ontology by DAVID for H3K4me3-enriched genes in NSCs; (vi) Gene Ontology by DAVID for H3K4me3-enriched genes in NBs.

**Supplemental Table 2:**

Summary of overlap targets and Gene Ontology by DAVID for (i<sub>a,b</sub>) GBM1 RNA-Seq and H3K4me3 ChIP-Seq; (ii<sub>a,b</sub>) GBM2 RNA-Seq and H3K4me3 ChIP-Seq; (iii<sub>a,b</sub>) GBM1 RNA-Seq, GBM2 RNA-Seq, and H3K4me3 ChIP-Seq; (iv<sub>a</sub>) Overlap genes among detectable transcripts from RNA-Seq of Baboon SVZ cells, GBM1 RNA-Seq, and GBM2 RNA-Seq; (iv<sub>b</sub>) Overlap genes among undetectable transcripts from RNA-Seq of Baboon SVZ cells, GBM1 RNA-Seq, and GBM2 RNA-Seq. All deep sequencing data for ChIP-Seq and RNA-Seq generated during the course of this study refer to GEO files.

# Epigenetic Regulation by Chromatin Activation Mark H3K4me3 in Primate Progenitor Cells within Adult Neurogenic Niche

Richard S. Sandstrom<sup>1</sup>, Michael R. Foret<sup>2</sup>, Douglas A. Grow<sup>2,3</sup>, Eric Haugen<sup>1</sup>, Christopher T. Rhodes<sup>2</sup>, Astrid E. Cardona<sup>2</sup>, Clyde F. Phelix<sup>2</sup>, Yufeng Wang<sup>2</sup>, Mitchel S. Berger<sup>4</sup>, and Chin-Hsing Annie Lin<sup>2,3\*</sup>

Lin\_Supplemental Figure 1

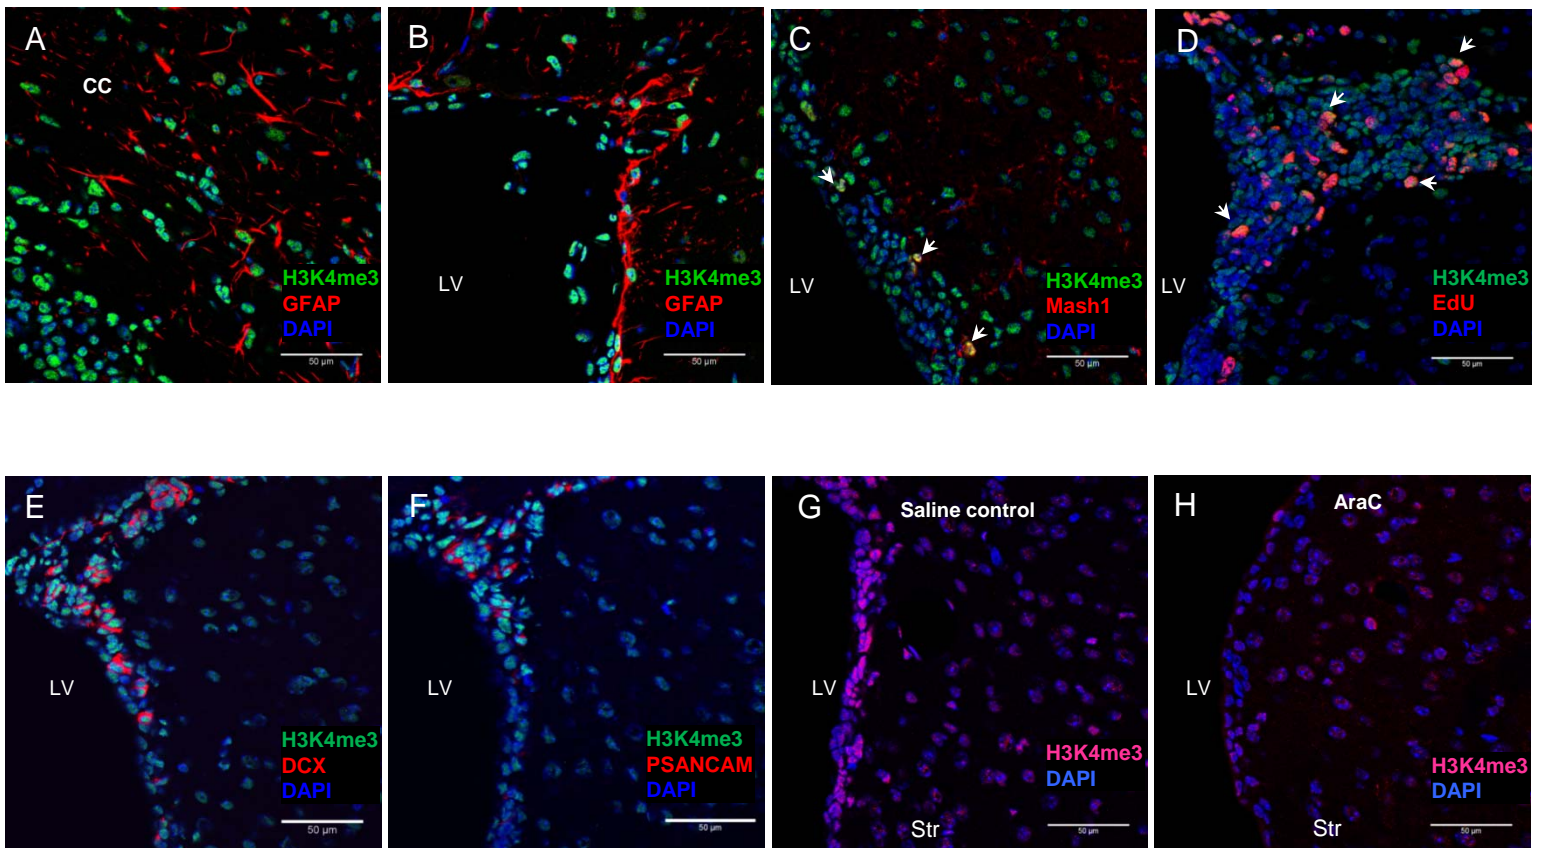



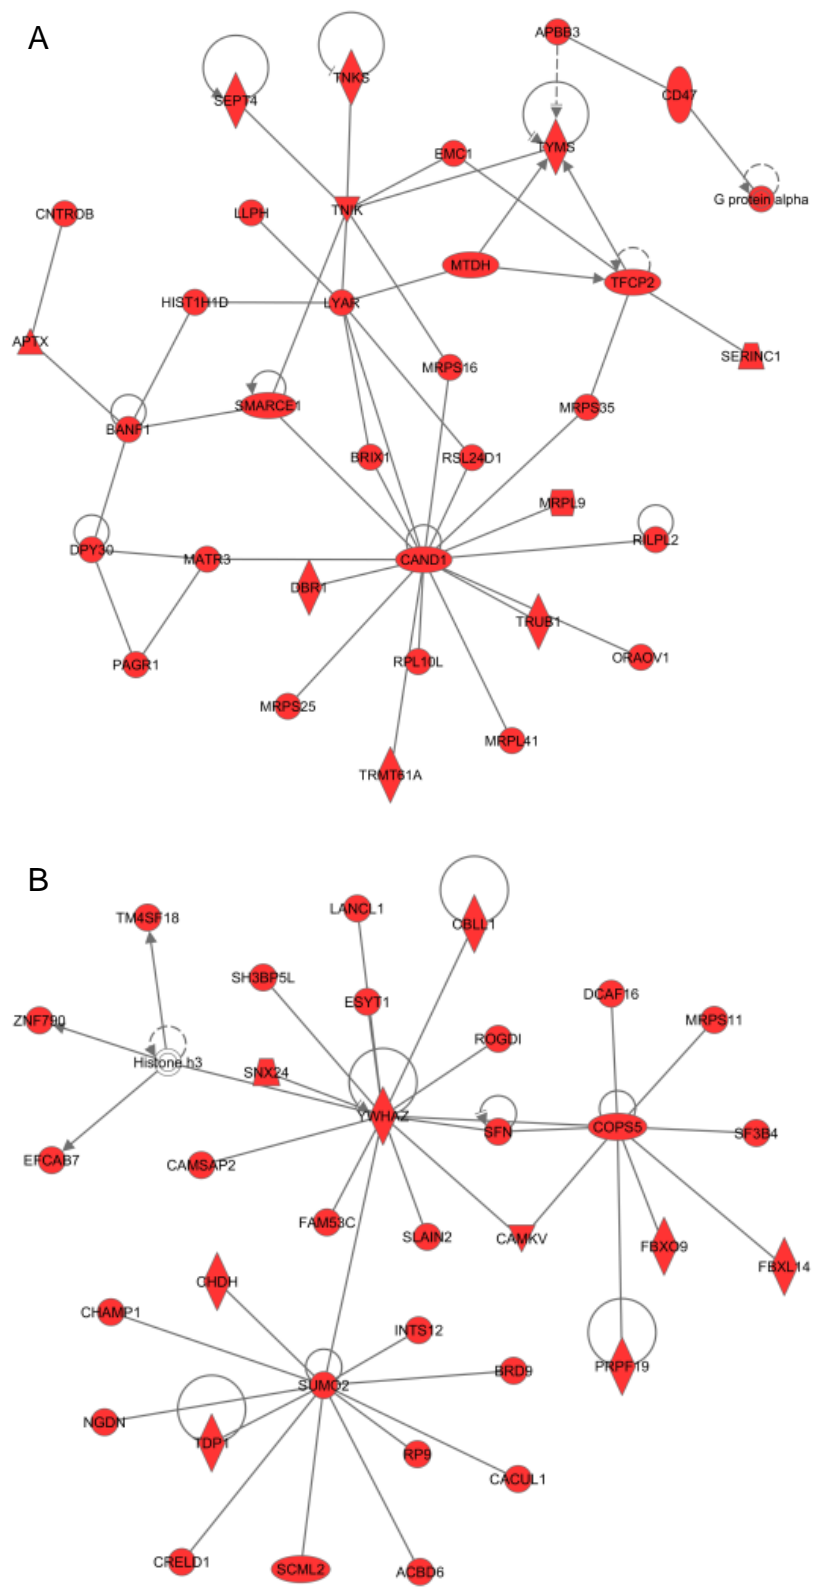

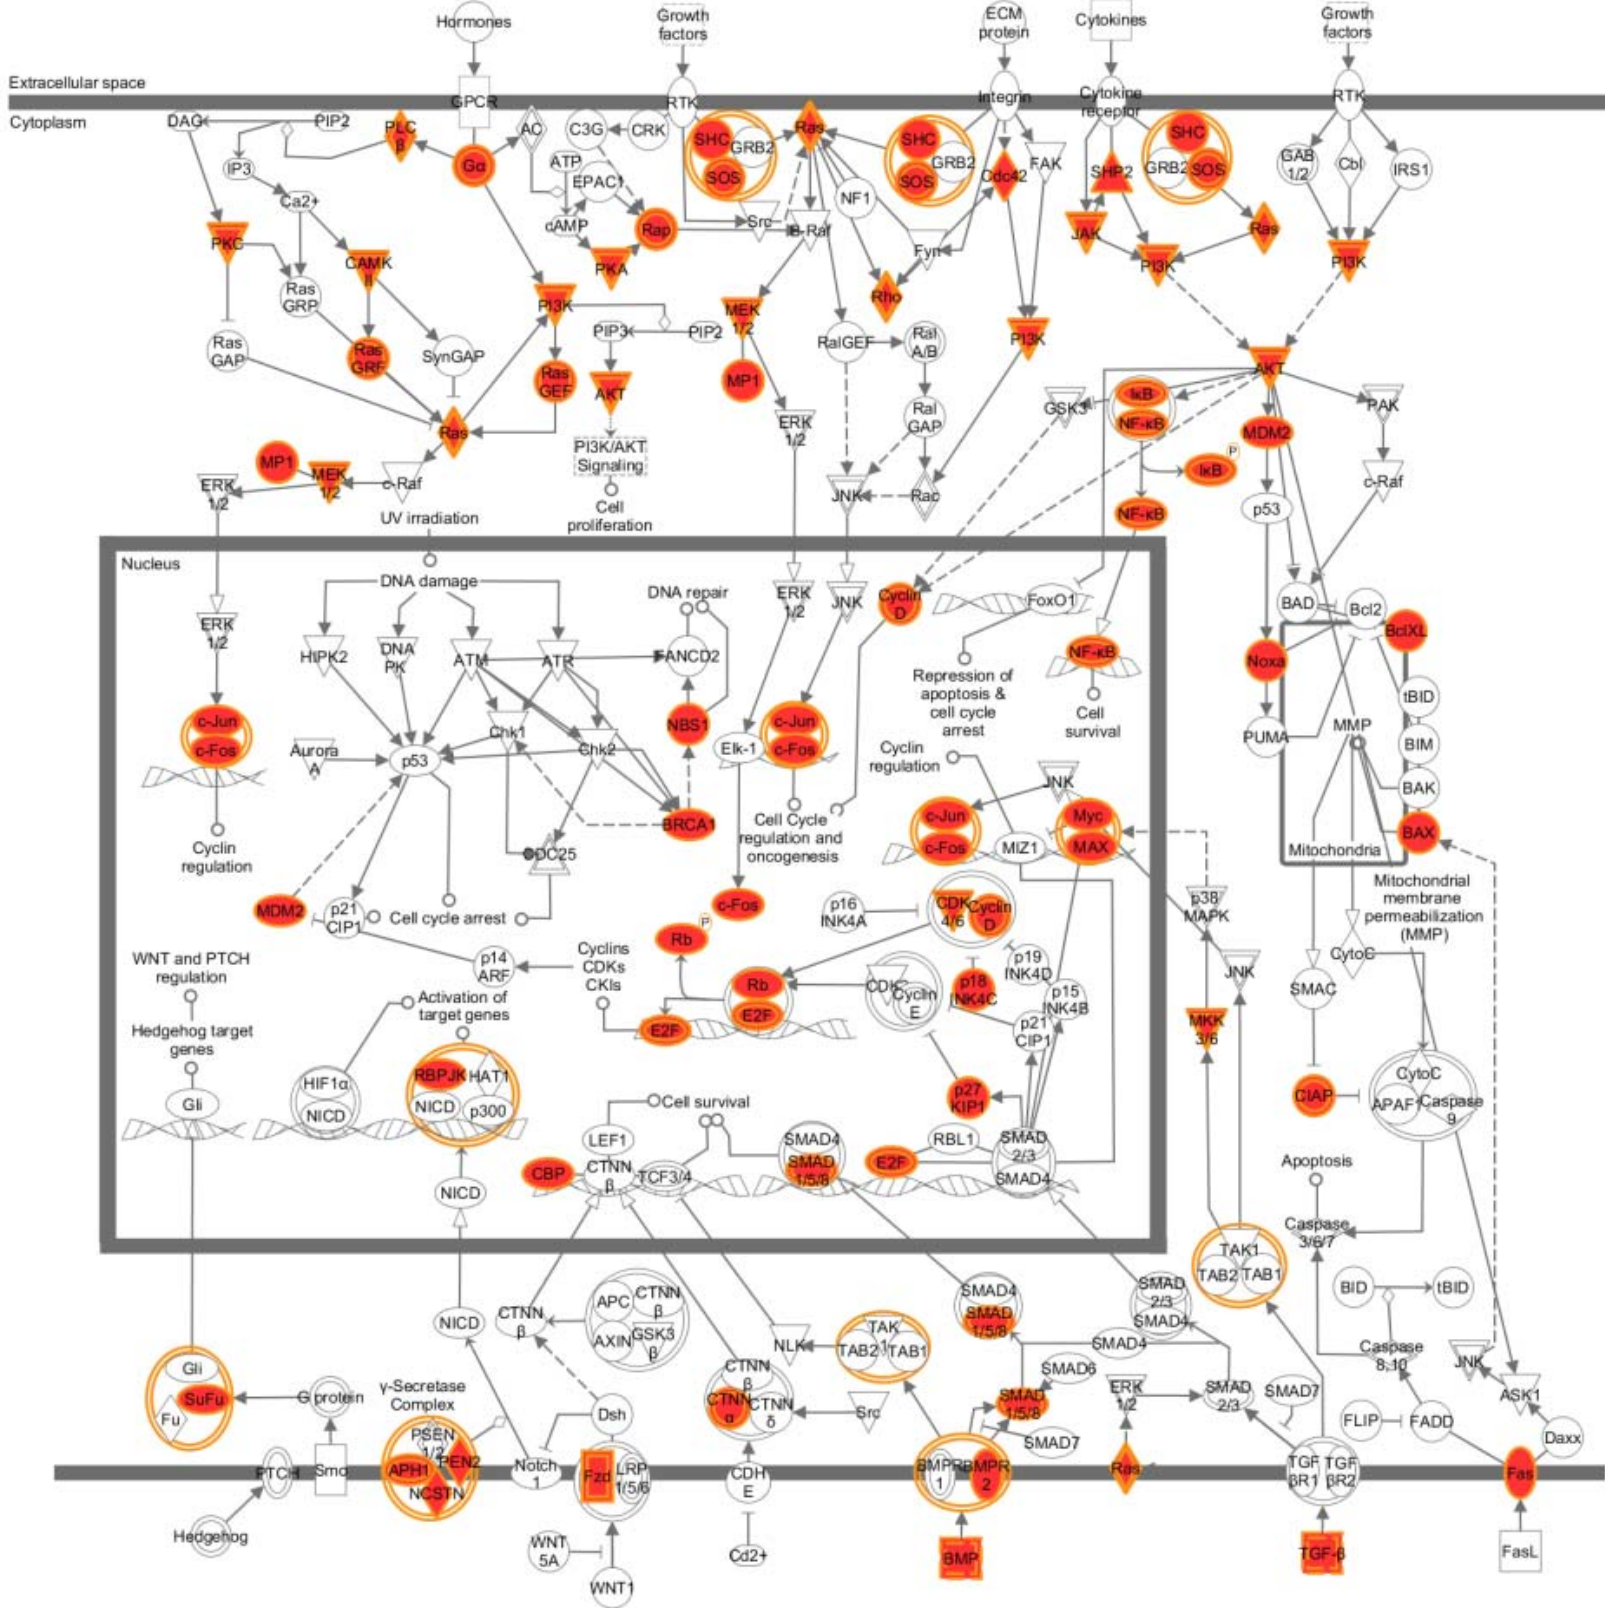

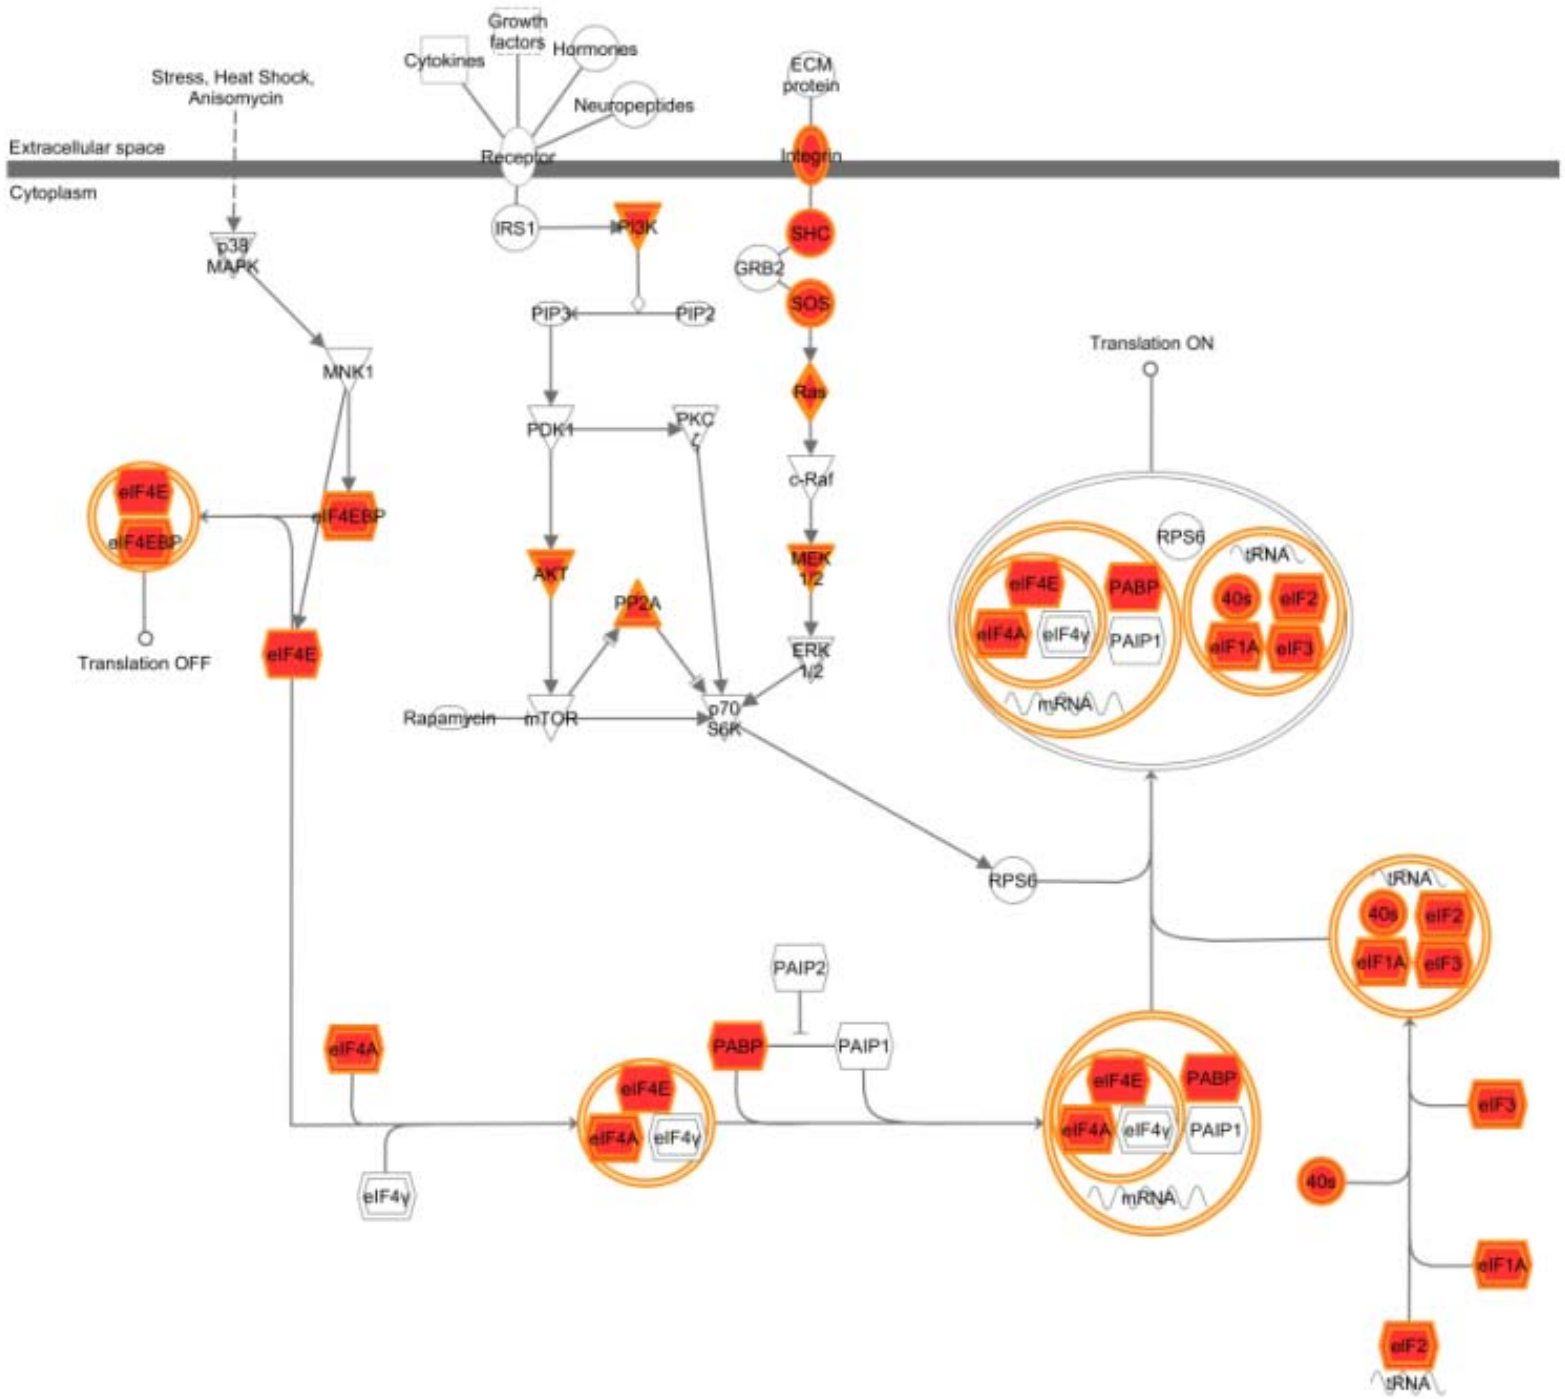

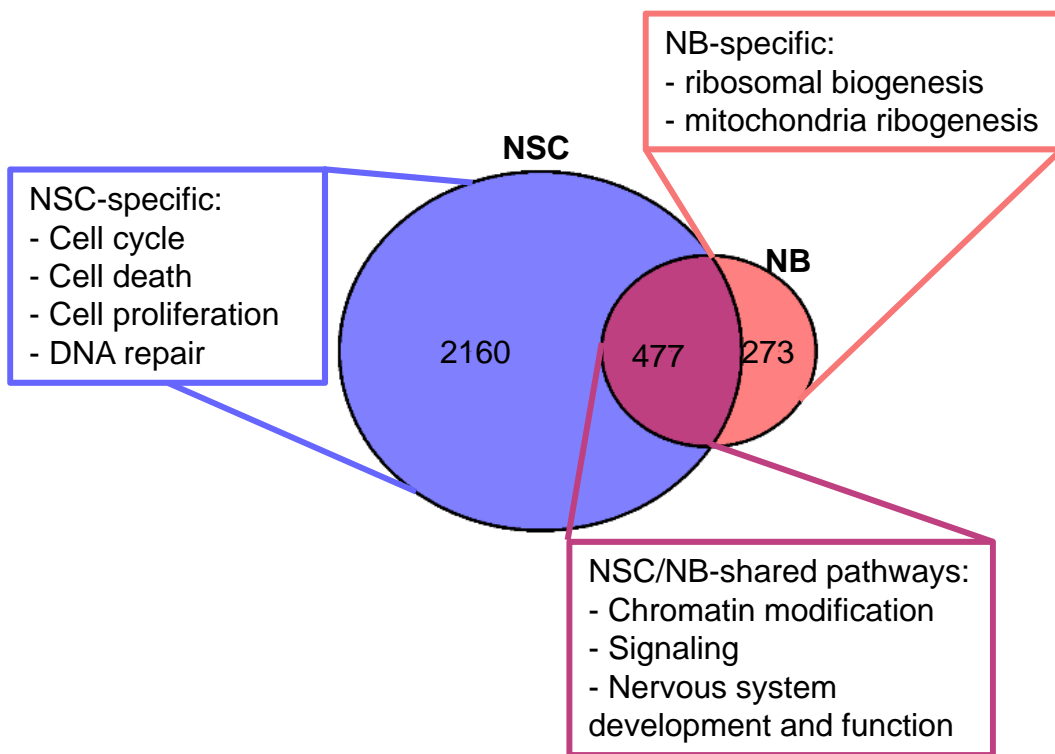



Supplemental Table 1: (*i<sub>a</sub>*) H3K4me3-enriched genes in the Baboon SVZ NSC population

| Gene Name | RefSeq ID    | Gene Name   | RefSeq ID    | Gene Name    | RefSeq ID    | Gene Name    | RefSeq ID    | Gene Name  | RefSeq ID    |
|-----------|--------------|-------------|--------------|--------------|--------------|--------------|--------------|------------|--------------|
| HMX1      | NM_001172429 | ATG4C       | NM_001257877 | MRPL24       | NM_001257844 | TNR          | NM_001261001 | PRKCE      | NM_001257741 |
| ADD1      | NM_001261471 | PGM1        | NM_001257491 | PRCC         | NM_001260635 | RFW2         | NM_001266265 | ATP6V1E2   | NM_001194583 |
| MAEA      | NM_001258174 | JAK1        | NM_001257909 | CD1D         | NM_001033114 | ASTN1        | NM_001266732 | C13H2orf61 | NM_001190958 |
| PCGF3     | NM_001258171 | LEPR        | NM_001032819 | CD1B         | NM_001145534 | PGBD2        | NM_001258110 | EPCAM      | NM_001040029 |
| TLL10     | NM_001163080 | PDE4B       | NM_001265964 | ATP1A2       | NM_001265686 | ZNF692       | NM_001261269 | FOXN2      | NM_001261043 |
| GLTPD1    | NM_001257474 | SGIP1       | NM_001265875 | PEA15        | NM_001198667 | SH3BP5L      | NM_001261606 | ASB3       | NM_001205031 |
| MRPL20    | NM_001260920 | GADD45A     | NM_001261305 | NCSTN        | NM_001260780 | NLRP3        | NM_001114351 | SPTBN1     | NM_001266968 |
| VWA1      | NM_001260638 | DIRAS3      | NM_001260868 | F11R         | NM_001266463 | SMYD3        | NM_001265933 | RTN4       | NM_001205127 |
| GNB1      | NM_001265894 | LRRC40      | NM_001261023 | UHMK1        | NM_001266768 | COX20        | NM_001257785 | CCDC104    | NM_001190915 |
| RER1      | NM_001257522 | ZRANB2      | NM_001257636 | TRIM11       | NM_001261480 | ADSS         | NM_001261110 | PEX13      | NM_001258170 |
| TPRG1L    | NM_001260515 | NEGR1       | NM_001261637 | GUK1         | NM_001266750 | AKT3         | NM_001266640 | C13H2orf74 | NM_001194779 |
| RPL22     | NM_001193564 | PFGT        | NM_001204799 | C1H1orf35    | NM_001265942 | GREM2        | NM_001266108 | XPO1       | NM_001266844 |
| PHF13     | NM_001260753 | TNNI3K      | NM_001204800 | PSEN2        | NM_001261617 | CHRM3        | NM_001257740 | B3GNT2     | NM_001261632 |
| VAMP3     | NM_001261368 | RABGGTB     | NM_001261560 | C1H1orf95    | NM_001266334 | LGALS8       | NM_001266745 | EHBP1      | NM_001261566 |
| RERE      | NM_001265662 | STB6GALNAC3 | NM_001261629 | PYCR2        | NM_001261780 | TBCE         | NM_001265678 | VP554      | NM_001261018 |
| SPSB1     | NM_001257717 | PIGK        | NM_001260944 | EPHX1        | NM_001265807 | RBM34        | NM_001257648 | PELL1      | NM_001260952 |
| CTNBP1    | NM_001260588 | AK5         | NM_001266348 | LBR          | NM_001261333 | KIAA1804     | NM_001265676 | SERTAD2    | NM_001261684 |
| DFFA      | NM_001260688 | RPF1        | NM_001261571 | CAPN2        | NM_001260667 | NTPCR        | NM_001267032 | RAB1A      | NM_001257272 |
| TNFRSF1B  | NM_001266205 | C1H1orf52   | NM_001258201 | TLR5         | NM_001130429 | DISC1        | NM_001114355 | ACTR2      | NM_001266940 |
| DHRS3     | NM_001260537 | DDAH1       | NM_001266704 | DUSP10       | NM_001257695 | GNPAT        | NM_001265780 | SPRED2     | NM_001261100 |
| EFHD2     | NM_001265791 | ZNHIT6      | NM_001266313 | LYPLAL1      | NM_001266865 | GALNT2       | NM_001261355 | C1D        | NM_001193604 |
| ZBTB17    | NM_001257470 | GTF2B       | NM_001266870 | TGFB2        | NM_001266518 | CCSAP        | NM_001261517 | ARHGAP25   | NM_001266047 |
| NECAP2    | NM_001258172 | LRRC8C      | NM_001257603 | KCTD3        | NM_001261234 | PCMTD2       | NM_001260721 | ANXA4      | NM_001266953 |
| IGSF21    | NM_001260991 | LRRC8D      | NM_001266553 | PROX1        | NM_001260873 | GID8         | NM_001260739 | ADD2       | NM_001266617 |
| EMC1      | NM_001261118 | ZNF326      | NM_001267024 | KCNH1        | NM_001267017 | LSM14B       | NM_001261605 | TEX261     | NM_001261231 |
| ALPL      | NM_001266889 | CDC7        | NM_001266610 | DIEXF        | NM_001261254 | ATP5E        | NM_001032901 | PAIP2B     | NM_001194156 |
| CELA3B    | NM_001195397 | RPAP2       | NM_001257890 | IRF6         | NM_001267018 | STX16        | NM_001257651 | SPR        | NM_001260549 |
| KDM1A     | NM_001265639 | FAM69A      | NM_001266885 | TRAF3IP3     | NM_001266224 | RAB22A       | NM_001193817 | RTKN       | NM_001261179 |
| ZNF436    | NM_001257465 | DR1         | NM_001257839 | PFKFB2       | NM_001265621 | RBM38        | NM_001257471 | TACR1      | NM_001037861 |
| GALE      | NM_001261703 | CNN3        | NM_001261809 | EIF2D        | NM_001266770 | CBLN4        | NM_001193909 | CTNNA2     | NM_001266343 |
| RHCE      | NM_001032964 | RWDD3       | NM_001266129 | AVPR1B       | NM_001246222 | PFDN4        | NM_001266117 | LRRTM1     | NM_001257467 |
| TMEM57    | NM_001038650 | CCDC76      | NM_001266714 | NUCKS1       | NM_001266481 | ZFP64        | NM_001257633 | RETSAT     | NM_001257563 |
| TRIM63    | NM_001260704 | DBT         | NM_001261277 | ELK4         | NM_001261604 | SPATA2       | NM_001260963 | RNF181     | NM_001265914 |
| ZNF593    | NM_001261042 | EXTL2       | NM_001267005 | KLHDC8A      | NM_001266347 | STAU1        | NM_001266308 | ST3GAL5    | NM_001257500 |
| CD52      | NM_001266187 | SLC30A7     | NM_001266184 | TMCC2        | NM_001266303 | CSE1L        | NM_001257813 | RNF103     | NM_001266577 |
| SFN       | NM_001258131 | OLFM3       | NM_001266811 | CNTN2        | NM_001265772 | ELMO2        | NM_001266903 | RPIA       | NM_001258126 |
| GNP2      | NM_001266887 | PRMT6       | NM_001257521 | REN          | NM_001032916 | MMP9         | NM_001266905 | KCNIP3     | NM_001257864 |
| TRNP1     | NM_001265795 | SLC25A24    | NM_001258085 | ETNK2        | NM_001260518 | MYBL2        | NM_001265855 | CIAO1      | NM_001258112 |
| FRG       | NM_001258057 | HENMT1      | NM_001257553 | ZC3H11A      | NM_001260962 | IFT52        | NM_001261644 | SEMO4      | NM_001266458 |
| EYA3      | NM_001266060 | PSRC1       | NM_001266394 | BTG2         | NM_001266234 | ZHX3         | NM_001265777 | ACTR1B     | NM_001257417 |
| YTHDF2    | NM_001265926 | PSMA5       | NM_001260609 | SYT2         | NM_001265809 | TOP1         | NM_001266512 | INPP4A     | NM_001261619 |
| SRSF4     | NM_001260878 | GSTM3       | NM_001261580 | GPR37L1      | NM_001266071 | SLC32A1      | NM_001266377 | MGAT4A     | NM_001194224 |
| MECR      | NM_001261169 | AHCYL1      | NM_001258058 | TIMM17A      | NM_001195660 | ADIG         | NM_001193372 | EIF5B      | NM_001261610 |
| SNRNP40   | NM_001195650 | KCNA2       | NM_001265976 | CSRP1        | NM_001257285 | RPRD1B       | NM_001261686 | CHST10     | NM_001257866 |
| KPNA6     | NM_001266992 | KCNA3       | NM_001258108 | TNNT2        | NM_001247991 | C10H20orf118 | NM_001194085 | CREG2      | NM_001194358 |
| ADC       | NM_001266222 | LRI1F       | NM_001266807 | CAMSAP1L1    | NM_001266713 | DLGAP4       | NM_001266645 | IL1R2      | NM_001047134 |
| SMIM12    | NM_001260616 | DEEND2D     | NM_001261060 | NEK7         | NM_001258200 | SCAND1       | NM_001190908 | TMEM182    | NM_001194411 |
| NCDN      | NM_001266697 | WDR77       | NM_001195443 | ASPM         | NM_001104535 | EDEM2        | NM_001261036 | MRPS9      | NM_001257485 |
| TRAPPC3   | NM_001266767 | CTTNBP2NL   | NM_001257547 | B3GALT2      | NM_001261572 | TP53INP2     | NM_001257771 | C13H2orf49 | NM_001194426 |
| LSM10     | NM_001257958 | SLC16A1     | NM_001257704 | RGS2         | NM_001265925 | SNTA1        | NM_001266239 | C13H2orf40 | NM_001194457 |
| MEAF6     | NM_001266268 | PTPN23      | NM_001261076 | RGS1         | NM_001258139 | KIF3B        | NM_001266387 | TTL        | NM_001266278 |
| MTF1      | NM_001257795 | OLFML3      | NM_001261337 | FAM5C        | NM_001261478 | DEFB129      | NM_001194510 | IL1B       | NM_001042756 |
| FHL3      | NM_001265674 | SIKE1       | NM_001261494 | C1H1orf27    | NM_001260697 | NRSN2        | NM_001194530 | CXCR4      | NM_001042645 |
| PPT1      | NM_001261332 | ATP1A1      | NM_001266673 | IVNS1ABP     | NM_001265910 | CSNK2A1      | NM_001260877 | MCM6       | NM_001260615 |
| SMAP2     | NM_001266730 | CD58        | NM_001267785 | EDEM3        | NM_001266794 | C2orf54      | NM_001194561 | DPP10      | NM_001265998 |
| FOXJ3     | NM_001266996 | CD2         | NM_001195473 | C1H1orf21    | NM_001260863 | PDYN         | NM_001257884 | INSIG2     | NM_001194781 |
| RIMKLA    | NM_001261229 | TRIM45      | NM_001266726 | RGL1         | NM_001266879 | SNRPB        | NM_001257716 | C1QL2      | NM_001193780 |
| C1H1orf50 | NM_001266364 | WDR3        | NM_001265643 | RNASEL       | NM_001042433 | ZNF343       | NM_001260644 | C13H2orf76 | NM_001193706 |
| SLC2A1    | NM_001257862 | NOTCH2      | NM_001260662 | STX6         | NM_001261300 | IDH3B        | NM_001266807 | TMEM177    | NM_001193730 |
| CDC20     | NM_001261117 | SEC22B      | NM_001261329 | ACBD6        | NM_001261348 | GNRH2        | NM_001034202 | PTPN4      | NM_001266624 |
| ELOVL1    | NM_001261559 | TXNIP       | NM_001257935 | TOR1AIP2     | NM_001261130 | FASTKD5      | NM_001190877 | RALB       | NM_001257799 |
| ATP6V0B   | NM_001257721 | ACP6        | NM_001257685 | RGS5         | NM_001260517 | DDRGK1       | NM_001194674 | ERCC3      | NM_001266408 |
| EIF2B3    | NM_001260654 | GNAQ        | NM_001261595 | NUF2         | NM_001261374 | C10H20orf194 | NM_001194506 | POLR2D     | NM_001267787 |
| HECTD3    | NM_001257654 | FCGR1       | NM_001257304 | RXRG         | NM_001257610 | SPEF1        | NM_001194681 | MZT2B      | NM_001193944 |
| PRDX1     | NM_001260933 | CA14        | NM_001257903 | MGST3        | NM_001266781 | MAVS         | NM_001042666 | IMP4       | NM_001266231 |
| LURAP1    | NM_001266426 | LASS2       | NM_001261642 | UCK2         | NM_001265960 | PRNP         | NM_001047152 | CFC1       | NM_001190851 |
| MOB3C     | NM_001260946 | POGZ        | NM_001266777 | MAEL         | NM_001260961 | SLC23A1      | NM_001261194 | FAM168B    | NM_001194008 |
| CMPK1     | NM_001193618 | MRPL9       | NM_001265691 | CD247        | NM_001077423 | MCM8         | NM_001265899 | CD151      | NM_001032822 |
| SPATA6    | NM_001265949 | S100A10     | NM_001032952 | SFT2D2       | NM_001265679 | PLCB1        | NM_001257867 | CHID1      | NM_001266971 |
| ELAVL4    | NM_001258180 | SMCP        | NM_001139460 | XCL1         | NM_001032947 | C2orf103     | NM_001194698 | TOLLIP     | NM_001261271 |
| FAF1      | NM_001265867 | CHTOP       | NM_001266813 | SLC19A2      | NM_001257523 | PAK7         | NM_001260987 | CTSD       | NM_001260554 |
| CDKN2C    | NM_001266314 | ILF2        | NM_001266173 | METTL18      | NM_001266262 | SNAP25       | NM_001032864 | MRPL23     | NM_001266484 |
| RNF11     | NM_001266146 | CREB3L4     | NM_001265999 | FMO2         | NM_001042777 | MKKS         | NM_001266509 | CD81       | NM_001266249 |
| GPX7      | NM_001159368 | RAB13       | NM_001261291 | PIGC         | NM_001261250 | FLRT3        | NM_001265872 | TSSC4      | NM_001193980 |
| DIO1      | NM_001122652 | SHC1        | NM_001261487 | FASLG        | NM_001032838 | PCSK2        | NM_001266205 | CARS       | NM_001266326 |
| TMEM59    | NM_001266204 | EFNA3       | NM_001265683 | CENPL        | NM_001261531 | DSTN         | NM_001195492 | CTTN       | NM_001266284 |
| SSBP3     | NM_001261084 | THBS3       | NM_001260514 | SERPINC1     | NM_001104583 | PET117       | NM_001266528 | ORAOV1     | NM_001194174 |
| PCSK9     | NM_001112660 | RHBG        | NM_001040418 | CACYBP       | NM_001266661 | C10H20orf26  | NM_001193937 | SUV420H1   | NM_001260793 |
| JUN       | NM_001265850 | HAPLN2      | NM_001265852 | LOC100423509 | NM_001260825 | RALGAPA2     | NM_001193946 | YIF1A      | NM_001194498 |
| THBD      | NM_001266049 | CNTN1       | NM_001261751 | ISCU         | NM_001261474 | ICOS         | NM_001266899 | HS3ST3A1   | NM_001194643 |
| NXT1      | NM_001194163 | GXYLT1      | NM_001193857 | ALKBH2       | NM_001194765 | GPR1         | NM_001047129 | COX10      | NM_001194644 |
| CST11     | NM_001038661 | YAF2        | NM_001266167 | FAM222A      | NM_001194323 | CREB1        | NM_001261120 | PMP22      | NM_001257609 |
| APMAP     | NM_001266050 | ADAMTS20    | NM_001110539 | GIT2         | NM_001266994 | CRYGC        | NM_001082964 | TVP23B     | NM_001260706 |
| ABHD12    | NM_001261275 | TMEM117     | NM_001261543 | PPTC7        | NM_001194374 | IDH1         | NM_001265779 | ZNF287     | NM_001266709 |
| NANP      | NM_001266157 | NELL2       | NM_001261759 | PPP1CC       | NM_001257831 | LANCL1       | NM_001258121 | ZSVIM7     | NM_001265702 |
| CECR5     | NM_001194230 | SLC38A1     | NM_001266098 | BRAP         | NM_001265936 | IKZF2        | NM_001258078 | FLCN       | NM_001266691 |
| PEX26     | NM_001260660 | SLC38A2     | NM_001257811 | PTPN11       | NM_001261109 | MREG         | NM_001258073 | TOML2      | NM_001260762 |
| COMT      | NM_001261012 | FAM113B     | NM_001194048 | OAS1         | NM_001083949 | RPL37A       | NM_001265725 | ATPAF2     | NM_001257951 |
| KLHL22    | NM_001261588 | C11H12orf68 | NM_001194183 | CCDC42B      | NM_001194263 | CXCR1        | NM_001261040 | ALKBH5     | NM_001193988 |
| SDF2L1    | NM_001145067 | CACNB3      | NM_001266978 | SDS          | NM_001194522 | ARPC2        | NM_001261239 | GRAP       | NM_001258059 |
| TOP3B     | NM_001266407 | CCDC65      | NM_001194281 | MED13L       | NM_001261532 | TMBIM1       | NM_001266529 | B9D1       | NM_001266722 |
| GNAZ      | NM_001261596 | TMBIM6      | NM_001195449 | TESC         | NM_001257539 | CTDSP1       | NM_001193873 | DHRS7B     | NM_001261025 |

Supplemental Table 1: ( $i_b$ ) H3K4me3-enriched genes in the Baboon SVZ NSC population

| Gene Name   | RefSeq ID    | Gene Name   | RefSeq ID    | Gene Name   | RefSeq ID    | Gene Name  | RefSeq ID    | Gene Name   | RefSeq ID    |
|-------------|--------------|-------------|--------------|-------------|--------------|------------|--------------|-------------|--------------|
| GUCD1       | NM_001260970 | COX14       | NM_001261469 | RFC5        | NM_001261662 | CRYBA2     | NM_001194054 | MAP2K3      | NM_001265947 |
| CRYBA4      | NM_001166011 | ATF1        | NM_001261536 | HSPB8       | NM_001032937 | DNAJB2     | NM_001266581 | WSB1        | NM_001261284 |
| PITPNB      | NM_001266329 | TFCP2       | NM_001266217 | PRKAB1      | NM_001266115 | DES        | NM_001194266 | LYRM9       | NM_001193351 |
| RASL10A     | NM_001260903 | C11H12orf44 | NM_001193916 | RNF10       | NM_001260820 | CHPF       | NM_001261199 | KIAA0100    | NM_001194408 |
| GAL3ST1     | NM_001266653 | EIF4B       | NM_001195808 | SPPL3       | NM_001266692 | INHA       | NM_001032955 | FAM22B      | NM_001194809 |
| DUSP18      | NM_001261330 | HOXC4       | NM_001194756 | RNF34       | NM_001265820 | EPHA4      | NM_001260870 | CRYBA1      | NM_001194386 |
| SELM        | NM_001159399 | OR10P1      | NM_001194029 | GPR81       | NM_001145254 | SCG2       | NM_001194420 | NUFIP2      | NM_001261811 |
| YWHAH       | NM_001266591 | CD63        | NM_001266295 | ABC89       | NM_001261296 | CUL3       | NM_001266652 | COO6        | NM_001194512 |
| TIMP3       | NM_001032956 | IL23A       | NM_001194669 | RILPL2      | NM_001260833 | KIAA1486   | NM_001194144 | TMIGD1      | NM_001194531 |
| LARGE       | NM_001260905 | STAT2       | NM_001266927 | ZNF664      | NM_001194125 | TM4SF20    | NM_001194504 | OMG         | NM_001260823 |
| TOM1        | NM_001266163 | HSD17B6     | NM_001194684 | FAM101A     | NM_001194211 | CCL20      | NM_001032854 | ADPK5R1     | NM_001257715 |
| RBFOX2      | NM_001261516 | NAB2        | NM_001266687 | PIWIL1      | NM_001195711 | PID1       | NM_001265883 | ASIC2       | NM_001271252 |
| EIF3D       | NM_001257511 | STAT6       | NM_001265997 | NOC4L       | NM_001258179 | CAB39      | NM_001267016 | NLE1        | NM_001258159 |
| TST         | NM_001193785 | STAC3       | NM_001194695 | PXMP2       | NM_001261587 | PSMD1      | NM_001257805 | RASL10B     | NM_001194639 |
| POLR2F      | NM_001265974 | OS9         | NM_001257725 | SPOPL       | NM_001266382 | EIF4E2     | NM_001258071 | NFEZL1      | NM_001261099 |
| CSNK1E      | NM_001261652 | AGAP2       | NM_001266854 | ARHGAP15    | NM_001258096 | EFDH1      | NM_001257942 | HOXB8       | NM_001190887 |
| DNAL4       | NM_001260611 | CYP27B1     | NM_001194713 | GTDC1       | NM_001261488 | ATG16L1    | NM_001261111 | ATP5G1      | NM_001195495 |
| SMCR7L      | NM_001194095 | CTDSP2      | NM_001266058 | MBD5        | NM_001266707 | UGT1A1     | NM_001032869 | NXP3        | NM_001266633 |
| GRAP2       | NM_001261710 | USP15       | NM_001266957 | RND3        | NM_001261682 | SH3BP4     | NM_001261601 | SFPO        | NM_001258173 |
| FAM109B     | NM_001194346 | C11H12orf61 | NM_001194719 | CACNB4      | NM_001261360 | AGAP1      | NM_001261633 | NME1        | NM_001204515 |
| TSPO        | NM_001258111 | C11H12orf66 | NM_001194721 | ARL6IP6     | NM_001260607 | CXCR7      | NM_001261729 | CA10        | NM_001266383 |
| LDOC1L      | NM_001194443 | WIF1        | NM_001260671 | RPRM        | NM_001193741 | ASB1       | NM_001261538 | TOM1L1      | NM_001261224 |
| NUP50       | NM_001265689 | CAND1       | NM_001261692 | NR4A2       | NM_001266910 | TWIST2     | NM_001193812 | HLF         | NM_001258177 |
| ATXN10      | NM_001260745 | DYRK2       | NM_001261216 | GPD2        | NM_001261055 | OTOS       | NM_001260881 | MMD         | NM_001194810 |
| PPARA       | NM_001033029 | IFNG        | NM_001032905 | ACVR1C      | NM_001266690 | GPR35      | NM_001193858 | TMEM100     | NM_001194249 |
| CDPF1       | NM_001194500 | NUP107      | NM_001261486 | PKP4        | NM_001266450 | BOK        | NM_001266922 | NOG         | NM_001265629 |
| CERK        | NM_001266852 | SLC35E3     | NM_001194726 | TANK        | NM_001257543 | DTYMK      | NM_001194775 | SCPEP1      | NM_001261026 |
| ZBED4       | NM_001261128 | MDM2        | NM_001266402 | GCA         | NM_001266140 | ING5       | NM_001194001 | AKAP1       | NM_001261641 |
| FAM116B     | NM_001194565 | CNOT2       | NM_001265869 | B3GALT1     | NM_001194204 | MYT1L      | NM_001265731 | MRPS23      | NM_001266448 |
| ADM2        | NM_001194708 | THAP2       | NM_001193501 | LASS6       | NM_001266123 | RNASEH1    | NM_001257858 | SRSF1       | NM_001196549 |
| SLC6A12     | NM_001266900 | TPH2        | NM_001039946 | BBS5        | NM_001194768 | IAH1       | NM_001193736 | SEPT4       | NM_001266717 |
| FBXL14      | NM_001260522 | GLIPR1      | NM_001261115 | PHOSPHO2    | NM_001194769 | ODC1       | NM_001198686 | C17orf71    | NM_001194385 |
| LRTM2       | NM_001261503 | OSBP18      | NM_001260879 | GORASP2     | NM_001261707 | PDIA6      | NM_001266635 | PTRH2       | NM_001194439 |
| FKBP4       | NM_001261339 | ZDHHC17     | NM_001260892 | DYNC112     | NM_001261589 | KCNF1      | NM_001257579 | C6H5orf48   | NM_001194064 |
| PARP11      | NM_001265841 | PPP1R12A    | NM_001266093 | DLX1        | NM_001260619 | ROCK2      | NM_001260913 | PPM1D       | NM_001260836 |
| C11H12orf4  | NM_001194147 | PPFIA2      | NM_001266465 | ITGA6       | NM_001258117 | E2F6       | NM_001266655 | APPBP2      | NM_001261507 |
| VWF         | NM_001243086 | LSM3        | NM_001261364 | OLA1        | NM_001266628 | FAM84A     | NM_001266538 | DHR511      | NM_001194811 |
| CD9         | NM_001260661 | MRPS25      | NM_001257670 | ATP5G3      | NM_001198734 | DDX1       | NM_001266562 | AATF        | NM_001257577 |
| MLF2        | NM_001266330 | GP9         | NM_001142313 | HOXD12      | NM_001194772 | FAM49A     | NM_001193919 | C16H17orf96 | NM_001193705 |
| C11H12orf57 | NM_001266876 | RPN1        | NM_001195652 | MTX2        | NM_001261122 | TTC32      | NM_001257581 | RPL23       | NM_001266209 |
| SLC2A3      | NM_001261533 | RUVBL1      | NM_001266990 | PRKRA       | NM_001260847 | RHOB       | NM_001194776 | LASP1       | NM_001265873 |
| PHC1        | NM_001260906 | TPRA1       | NM_001261656 | SESTD1      | NM_001257515 | C13H2orf43 | NM_001194777 | PPP1R1B     | NM_001266974 |
| KLRF1       | NM_001032961 | C11H12orf29 | NM_001257680 | PDE1A       | NM_001257584 | SF3B14     | NM_001260884 | CASC3       | NM_001260566 |
| QLR1        | NM_001194668 | DUSP6       | NM_001257792 | DUSP19      | NM_001194218 | PTRHD1     | NM_001193681 | IGFBP4      | NM_001260546 |
| ETV6        | NM_001266080 | GALNT4      | NM_001194761 | NUP35       | NM_001266251 | ADCY3      | NM_001205221 | CCR7        | NM_001032884 |
| LOH12CR1    | NM_001261647 | POC1B       | NM_001261628 | ZC3H15      | NM_001258198 | DNAJC27    | NM_001257595 | FKBP10      | NM_001260551 |
| CREBL2      | NM_001261237 | BTG1        | NM_001266672 | ITGAV       | NM_001265953 | KIF3C      | NM_001266930 | CNP         | NM_001035528 |
| HEBP1       | NM_001266629 | CRADD       | NM_001267004 | COL3A1      | NM_001266039 | EPT1       | NM_001135563 | DNAJC7      | NM_001261251 |
| WBP11       | NM_001257936 | PLXNC1      | NM_001261691 | ASNSD1      | NM_001194770 | C13H2orf70 | NM_001193808 | HCRT        | NM_001194432 |
| C11H12orf69 | NM_001190832 | NDUFA12     | NM_001194335 | ORMDL1      | NM_001266349 | C13H2orf18 | NM_001193806 | EZH1        | NM_001257456 |
| MGP         | NM_001195379 | VEZT        | NM_001261356 | MSTN        | NM_001080119 | PPP1CB     | NM_001260652 | BECN1       | NM_001266685 |
| RERG        | NM_001261674 | METAP2      | NM_001266460 | NAB1        | NM_001257641 | LHB        | NM_001194275 | HEXIM2      | NM_001194678 |
| EPS8        | NM_001257917 | ELK3        | NM_001194388 | STAT1       | NM_001261614 | EHD3       | NM_001257730 | CRHR1       | NM_001032803 |
| LMO3        | NM_001266306 | CDK17       | NM_001194763 | OBFC2A      | NM_001261728 | DPY30      | NM_001261093 | METTL2A     | NM_001266641 |
| SLCO1A2     | NM_001261711 | TMPO        | NM_001261527 | SDPR        | NM_001265645 | YIPF4      | NM_001257440 | CYB5B1      | NM_001190736 |
| LYRM5       | NM_001257657 | FAM71C      | NM_001193809 | SLC39A10    | NM_001260918 | RASGRP3    | NM_001261700 | FTSJ3       | NM_001266131 |
| KRAS        | NM_001261512 | SCYL2       | NM_001266890 | GTF3C3      | NM_001257564 | FAM98A     | NM_001267029 | DDX5        | NM_001258162 |
| RASSF8      | NM_001266170 | DRAM1       | NM_001193971 | SF3B1       | NM_001265963 | EIF2AK2    | NM_001083948 | PRKCA       | NM_001260733 |
| SSPN        | NM_001261346 | IGF1        | NM_001260726 | MOBK13      | NM_001257738 | CDC42EP3   | NM_001194182 | PSMD12      | NM_001265853 |
| MED21       | NM_001258120 | CHST11      | NM_001258082 | PLCL1       | NM_001260854 | CYP1B1     | NM_001266868 | C16H17orf58 | NM_001190961 |
| STK38L      | NM_001261495 | C11H12orf45 | NM_001194107 | C2orf60     | NM_001193883 | SRSF7      | NM_001195586 | MAP2K6      | NM_001261706 |
| REP15       | NM_001194247 | TCP11L2     | NM_001261173 | SPATS2L     | NM_001260595 | SLC8A1     | NM_001032861 | KCNJ2       | NM_001032859 |
| MRPS35      | NM_001194252 | C11H12orf23 | NM_001194764 | FAM126B     | NM_001194005 | KCNG3      | NM_001261485 | SOX9        | NM_001032868 |
| PTHLH       | NM_001261680 | CRY1        | NM_001194159 | NOP58       | NM_001261186 | MTA3       | NM_001265625 | COG1        | NM_001266362 |
| FAR2        | NM_001265709 | PRDM4       | NM_001257560 | BMPR2       | NM_001260859 | PPM1B      | NM_001266202 | CDC42EP4    | NM_001265833 |
| METTL20     | NM_001193718 | SART3       | NM_001257555 | CD28        | NM_001042641 | PREPL      | NM_001194545 | RAB37       | NM_001266608 |
| QTRTD1      | NM_001265882 | KCNMB2      | NM_001194444 | ZNF174      | NM_001266897 | RSPH1      | NM_001194309 | TMEM106B    | NM_001193700 |
| IGSF11      | NM_001257906 | NLGN1       | NM_001257734 | CREBBP      | NM_001260715 | C2CD2      | NM_001265746 | ICA1        | NM_001265706 |
| B4GALT4     | NM_001257832 | TNFSF10     | NM_001266034 | NMRAL1      | NM_001265685 | MX2        | NM_001079696 | MIOS        | NM_001257861 |
| TMEM39A     | NM_001258076 | TNIK        | NM_001261217 | FAM86A      | NM_001194839 | LCA5L      | NM_001194409 | TAC1        | NM_001257461 |
| ADPRH       | NM_001261181 | EIF5A2      | NM_001260939 | METTL22     | NM_001194202 | DYRK1A     | NM_001258143 | SHFM1       | NM_001266805 |
| FSTL1       | NM_001244587 | SLC7A14     | NM_001257912 | CARHSP1     | NM_001261063 | DISC3      | NM_001265971 | DNCL1       | NM_001261582 |
| RABL3       | NM_001194507 | CLDN11      | NM_001260553 | DEXI        | NM_001193393 | CLDN14     | NM_001193733 | COL1A2      | NM_001266337 |
| EAF2        | NM_001193490 | SEC62       | NM_001195502 | PRM1        | NM_001143822 | SETD4      | NM_001266274 | CDK6        | NM_001261307 |
| CSTA        | NM_001258142 | SERPIN1     | NM_001260895 | ZC3H7A      | NM_001257840 | RUNX1      | NM_001265962 | KRIT1       | NM_001261769 |
| SEC22A      | NM_001194575 | SPTSSB      | NM_001193354 | BFAR        | NM_001260924 | ATP5O      | NM_001195583 | CLDN12      | NM_001194860 |
| PTPLB       | NM_001261129 | SMC4        | NM_001261676 | RRN3        | NM_001257664 | IFNAR1     | NM_001266513 | SRI         | NM_001266216 |
| ITGB5       | NM_001266206 | IL12A       | NM_001044734 | TMC7        | NM_001257826 | C3H21orf59 | NM_001194041 | ABCB1       | NM_001032887 |
| ROPN1B      | NM_001194626 | LXN         | NM_001266988 | ITPR1L2     | NM_001193712 | SOD1       | NM_001032804 | C3H7orf23   | NM_001194372 |
| SLC41A3     | NM_001261258 | MLF1        | NM_001261200 | IQCK        | NM_001193745 | GRIK1      | NM_001194856 | KIAA1324L   | NM_001194030 |
| ALDH1L1     | NM_001266022 | KCNAB1      | NM_001260716 | THUMPD1     | NM_001265929 | BACH1      | NM_001257637 | SEMA3C      | NM_001260533 |
| CHST13      | NM_001194636 | GMPS        | NM_001261203 | CDR2        | NM_001260929 | USP16      | NM_001260999 | CD36        | NM_001032913 |
| CHCHD6      | NM_001266664 | MME         | NM_001260814 | UBFD1       | NM_001266120 | ADAMTS1    | NM_001266264 | PHF2        | NM_001258132 |
| WNT7A       | NM_001265938 | RAP2B       | NM_001194854 | PRKCB       | NM_001257514 | GABPA      | NM_001266585 | TMEM60      | NM_001193703 |
| HDAC11      | NM_001265655 | P2RY1       | NM_001261723 | CACNG3      | NM_001261544 | C3H21orf91 | NM_001194344 | DNAJC2      | NM_001260798 |
| VGLL4       | NM_001194848 | P2RY12      | NM_001194370 | C20H16orf82 | NM_001145761 | BTG3       | NM_001266041 | ORC5        | NM_001261088 |
| ATG7        | NM_001265972 | SLAH2       | NM_001194383 | TUFM        | NM_001266084 | HSPA13     | NM_001193708 | SRPK2       | NM_001257472 |
| SLC6A11     | NM_001134952 | SELT        | NM_001159414 | PPP4C       | NM_001261762 | ABCC13     | NM_001032930 | PIK3CG      | NM_001266758 |
| SEC13       | NM_001266970 | COMMD2      | NM_001194418 | GDPD3       | NM_001194431 | COX19      | NM_001257834 | PNPLA8      | NM_001266037 |
| NFYB        | NM_001257720 | TM4SF18     | NM_001261318 | BOLA2       | NM_001194470 | ZFAND2A    | NM_001194857 | DNAJB9      | NM_001265876 |
| SETD5       | NM_001265978 | PLSCR1      | NM_001258077 | ZNF688      | NM_001194841 | FTSJ2      | NM_001266892 | IMP2L1      | NM_001261314 |
| CAV3        | NM_001194078 | PLSCR4      | NM_001266547 | ORAI3       | NM_001194521 | NUDT1      | NM_001261225 | IFRD1       | NM_001261783 |

Supplemental Table 1: (i<sub>c</sub>) H3K4me3-enriched genes in the Baboon SVZ NSC population

| Gene Name | RefSeq ID    | Gene Name   | RefSeq ID    | Gene Name   | RefSeq ID    | Gene Name  | RefSeq ID    | Gene Name | RefSeq ID     |
|-----------|--------------|-------------|--------------|-------------|--------------|------------|--------------|-----------|---------------|
| EDEM1     | NM_001265750 | C2H3orf58   | NM_001261041 | COX6A2      | NM_001194578 | PAPOLB     | NM_001194858 | GPR85     | NM_0011948620 |
| BHLHE40   | NM_001257518 | CHST2       | NM_001257509 | C20H16orf58 | NM_001194596 | KDEL2      | NM_001260765 | FOX2      | NM_001033021  |
| LRRN1     | NM_001194133 | ZBTB38      | NM_001266012 | ORC6L       | NM_001194605 | ZDHHC4     | NM_001261639 | CAPZ2     | NM_001168609  |
| CRBN      | NM_001195647 | ACPL2       | NM_001171842 | C20H16orf87 | NM_001194607 | BRI3       | NM_001266634 | S7        | NM_001168665  |
| EBLN2     | NM_001265951 | MRAS        | NM_001260569 | PHKB        | NM_001261044 | SMURF1     | NM_001257631 | ASZ1      | NM_001168607  |
| FOXP1     | NM_001266321 | SOX14       | NM_001194657 | SIAH1       | NM_001260838 | FAM200A    | NM_001194538 | CTTNBP2   | NM_001168625  |
| MITF      | NM_001266857 | NCK1        | NM_001257480 | CBLN1       | NM_001193684 | ZNF498     | NM_001257455 | KCND2     | NM_001261699  |
| ARL6IP5   | NM_001257759 | TMEM22      | NM_001260796 | SNX20       | NM_001261262 | ZKSCAN1    | NM_001194124 | FAM3C     | NM_001266245  |
| UBA3      | NM_001265961 | PCCB        | NM_001265851 | RPGRIP1L    | NM_001257423 | C3H7orf43  | NM_001194207 | RNF133    | NM_001198705  |
| FAM19A1   | NM_001261362 | MSL2        | NM_001266958 | SLC6A2      | NM_001033022 | CUTL1      | NM_001261815 | NDUFA5    | NM_001198685  |
| SLC25A26  | NM_001261056 | PPP2R3A     | NM_001257608 | GNAO1       | NM_001195429 | ORAI2      | NM_001265868 | WASL      | NM_001266797  |
| PRICKLE2  | NM_001260650 | RAB6B       | NM_001261236 | MT3         | NM_001266138 | CCL24      | NM_001194459 | GPR37     | NM_001257869  |
| PSMD6     | NM_001266757 | TMEM108     | NM_001265634 | CPNE2       | NM_001260641 | DNAJC30    | NM_001194544 | GRM8      | NM_001261246  |
| SYNPR     | NM_001266609 | ATP2C1      | NM_001266023 | ARL2BP      | NM_001267028 | CLDN4      | NM_001194564 | GCC1      | NM_001265763  |
| C2H3orf14 | NM_001257952 | METTL6      | NM_001266134 | GPR56       | NM_001033020 | GT2IRD1    | NM_001265885 | TNPO3     | NM_001266048  |
| FHIT      | NM_001257821 | OXNAD1      | NM_001265832 | ZNF319      | NM_001266824 | GATSL2     | NM_001266104 | UBE2H     | NM_001261059  |
| FAM107A   | NM_001257546 | TBC1D5      | NM_001258153 | C20H16orf80 | NM_001194181 | WBSR17     | NM_001265889 | C3H7orf45 | NM_001194010  |
| SLMAP     | NM_001261125 | KCNH8       | NM_001261509 | GINS3       | NM_001260655 | TMEM248    | NM_001193777 | TSGA14    | NM_001266838  |
| PDE12     | NM_001258194 | RAB5A       | NM_001261148 | SLC38A7     | NM_001260850 | TPST1      | NM_001257855 | MKLN1     | NM_001260802  |
| SELK      | NM_001159381 | UBE2E2      | NM_001193865 | CDH8        | NM_001257905 | VKORC1L1   | NM_001266931 | SLC35B4   | NM_001257677  |
| CHDH      | NM_001257809 | NKIRAS1     | NM_001266422 | CDH11       | NM_001266613 | PHKG1      | NM_001261185 | BPGM      | NM_001266072  |
| WDR82     | NM_001261101 | TOP2B       | NM_001265701 | CKLF        | NM_001265912 | LANCL2     | NM_001261176 | MTPN      | NM_001260744  |
| RPL29     | NM_001266773 | LRRC3B      | NM_001193981 | NAE1        | NM_001261116 | VSTM2A     | NM_001193935 | PTN       | NM_001194354  |
| ABHD14B   | NM_001171865 | CMC1        | NM_001261273 | LOC696623   | NM_001260556 | GRB10      | NM_001257428 | TRIM24    | NM_001260835  |
| RBM15B    | NM_001265669 | AZ12        | NM_001266975 | PSKH1       | NM_001265966 | IGFBP3     | NM_001260547 | C3H7orf55 | NM_001194423  |
| TMEM115   | NM_001266515 | TGFBR2      | NM_001261151 | PSMB10      | NM_001194028 | NUDC3      | NM_001266593 | Rab19     | NM_001261554  |
| CYB561D2  | NM_001194850 | CMTM7       | NM_001260694 | PLA2G15     | NM_001265818 | BLVRA      | NM_001258144 | MRPS33    | NM_001266016  |
| TUSC2     | NM_001261666 | CRTAP       | NM_001261752 | CYB5B       | NM_001194167 | HECW1      | NM_001265810 | AGK       | NM_001260561  |
| GNAI2     | NM_001258107 | UBP1        | NM_001266788 | NOB1        | NM_001258197 | PSMA2      | NM_001266881 | PRSS37    | NM_001194861  |
| CAMKV     | NM_001261530 | EIF4A2      | NM_001195661 | WWP2        | NM_001267601 | C7orf36    | NM_001194130 | EPHB6     | NM_001265762  |
| CCDC72    | NM_001193367 | ST6GAL1     | NM_001258080 | DHX38       | NM_001257881 | SFRP4      | NM_001032962 | TAS2R40   | NM_001080764  |
| CAMP      | NM_001033509 | RTP4        | NM_001194237 | FTSJD1      | NM_001261079 | ELMO1      | NM_001257647 | FAM115C   | NM_001193948  |
| CCR5      | NM_001042773 | BCL6        | NM_001261326 | VAC14       | NM_001261476 | SEPT7      | NM_001258100 | C3H7orf33 | NM_001194007  |
| SACM1L    | NM_001194852 | CLDN1       | NM_001193969 | ST3GAL2     | NM_001266341 | NPSR1      | NM_001032942 | ZNF862    | NM_001266842  |
| TMEM42    | NM_001194661 | IL1RAP      | NM_001032960 | FA2H        | NM_001194422 | RP9        | NM_001257627 | GIMAP4    | NM_001257713  |
| LOC714979 | NM_001266705 | PYDC2       | NM_001193432 | CTRB1       | NM_001194456 | LSM5       | NM_001257816 | GIMAP2    | NM_001193516  |
| ZNF501    | NM_001194298 | FGF12       | NM_001194006 | GABARAPL2   | NM_001194264 | CHN2       | NM_001261577 | CDK5      | NM_001266418  |
| ABHD5     | NM_001265641 | MB21D2      | NM_001194011 | KARS        | NM_001257593 | TAX1BP1    | NM_001266932 | RHEB      | NM_001261182  |
| SNRK      | NM_001257661 | FAM43A      | NM_001194070 | DYNLRB2     | NM_001257686 | SKAP2      | NM_001257598 | ACTR3B    | NM_001266189  |
| SEC22C    | NM_001194677 | ACAP2       | NM_001261274 | SDR42E1     | NM_001194527 | SNX10      | NM_001266895 | HTRA5     | NM_001195824  |
| LYZL4     | NM_001194683 | DLG1        | NM_001266294 | CDH13       | NM_001266552 | HNRNPA2B1  | NM_001265771 | CNPY1     | NM_001193382  |
| CTNNB1    | NM_001257918 | CEP19       | NM_001260983 | HSDL1       | NM_001194551 | NPVF       | NM_001033115 | NCAPG2    | NM_001258148  |
| ENTPD3    | NM_001266748 | LOC711340   | NM_001265954 | KIAA0513    | NM_001194581 | MPP6       | NM_001260678 | DUSP22    | NM_001260542  |
| MOBP      | NM_001190966 | PDIA2       | NM_001266045 | COX4NB      | NM_001265927 | NPY        | NM_001032814 | EXOC2     | NM_001266944  |
| CSRNP1    | NM_001258149 | C20H16orf13 | NM_001204163 | MAP1LC3B    | NM_001193625 | RAPGEF5    | NM_001194158 | GMSD      | NM_001266789  |
| OXR1      | NM_001257780 | FAM195A     | NM_001193773 | MVD         | NM_001260543 | CDC47L     | NM_001257527 | PSMG4     | NM_001261808  |
| MYD88     | NM_001130681 | STUB1       | NM_001257558 | TRAPPC2L    | NM_001265756 | SP4        | NM_001266828 | FAM50B    | NM_001267791  |
| TBCCD1    | NM_001266952 | NARFL       | NM_001204755 | DPEP1       | NM_001260742 | ITGB8      | NM_001265993 | SLN1      | NM_001194743  |
| C2H3orf70 | NM_001193899 | GNG13       | NM_001266642 | DBNDD1      | NM_001261592 | TMEM196    | NM_001194223 | SLC35B3   | NM_001257835  |
| KLHL24    | NM_001260584 | TRAF7       | NM_001261227 | PRMT2       | NM_001265880 | FERD3L     | NM_001194245 | C4H6orf22 | NM_001193881  |
| SOX2      | NM_001142940 | ZNF200      | NM_001261221 | YBEY        | NM_001265798 | AGR2       | NM_001194304 | C4H6orf28 | NM_001261719  |
| DNAJC19   | NM_001266267 | ZNF263      | NM_001266542 | PWP2        | NM_001257755 | BZW2       | NM_001194859 | TMEM170B  | NM_001261045  |
| PIK3CA    | NM_001260668 | TIGD7       | NM_001194837 | TRAPPC10    | NM_001266601 | SOSTDC1    | NM_001194311 | C6orf105  | NM_001193850  |
| SLC25A31  | NM_001194300 | HMGCS1      | NM_001260869 | CXXC5       | NM_001266606 | TMOD3      | NM_001266419 | KLHL28    | NM_001261270  |
| PHF17     | NM_001266133 | CCL28       | NM_001032877 | IGIP        | NM_001193358 | ARPP19     | NM_001266449 | ARF6      | NM_001194058  |
| SCLT1     | NM_001258164 | PAIP1       | NM_001266304 | PFDN1       | NM_001266275 | RAB27A     | NM_001193855 | METTL21D  | NM_001266438  |
| C5H4orf33 | NM_001193510 | FGF10       | NM_001193950 | NDUFA2      | NM_001261499 | MNS1       | NM_001266861 | SOS2      | NM_001260585  |
| SLC7A11   | NM_001266291 | PELO        | NM_001190867 | PCDHA5      | NM_001198669 | FAM81A     | NM_001257823 | ATL1      | NM_001257493  |
| MGARP     | NM_001193816 | ITGA2       | NM_001260822 | PCDHB1      | NM_001193851 | GCNT3      | NM_001194134 | SAV1      | NM_001261241  |
| NAA15     | NM_001258103 | ARL15       | NM_001257418 | PCDHB8      | NM_001193904 | RPS27L     | NM_001193433 | GNG2      | NM_001190910  |
| RAB33B    | NM_001257437 | SNX18       | NM_001261750 | TAF7        | NM_001193945 | CA12       | NM_001257824 | ERO1L     | NM_001266764  |
| SETD7     | NM_001257503 | IL6ST       | NM_001265991 | KIAA0141    | NM_001193906 | SNX1       | NM_001266850 | GPNAT1    | NM_001260699  |
| MGST2     | NM_001261313 | C5orf35     | NM_001194171 | GNPDA1      | NM_001257944 | SNX22      | NM_001257708 | FERM2     | NM_001266319  |
| ELMOD2    | NM_001193877 | GAPT        | NM_001194231 | NDFIP1      | NM_001194017 | KIAA0101   | NM_001190743 | CDKN3     | NM_001260917  |
| ZNF330    | NM_001266710 | RAB3C       | NM_001265995 | FGF1        | NM_001266029 | ZNF609     | NM_001258136 | CNIH      | NM_001193769  |
| IL15      | NM_001044731 | DEPDC1B     | NM_001194881 | YIPF5       | NM_001260957 | RASL12     | NM_001265994 | FBXO34    | NM_001266246  |
| USP38     | NM_001260711 | NDUFA2      | NM_001266244 | KCTD16      | NM_001266825 | CLPX       | NM_001260887 | NAA30     | NM_001266880  |
| GAB1      | NM_001266432 | KIF2A       | NM_001266858 | RBM27       | NM_001261062 | PTPLAD1    | NM_001266546 | PSMA3     | NM_001260896  |
| SMARCA5   | NM_001266324 | HTR1A       | NM_001198700 | JAKMIP2     | NM_001265812 | RAB11A     | NM_001261789 | DAAM1     | NM_001257504  |
| HHIP      | NM_001257597 | RGS7BP      | NM_001266063 | SPINK9      | NM_001193441 | SNAPC5     | NM_001261252 | JKAMP     | NM_001260993  |
| SMAD1     | NM_001261367 | SREK1IP1    | NM_001261537 | PCYOX1L     | NM_001266159 | RPL4       | NM_001266200 | MNAT1     | NM_001261796  |
| C5H4orf51 | NM_001194878 | C6H5orf44   | NM_001266356 | SLC6A7      | NM_001266791 | SMAD3      | NM_001266160 | TRMT5     | NM_001261618  |
| EDNRA     | NM_001261492 | PIK3R1      | NM_001261197 | NDST1       | NM_001266766 | PIAS1      | NM_001266301 | SNAPC1    | NM_001257672  |
| TMEM184C  | NM_001260921 | SLC30A5     | NM_001266785 | MYOZ3       | NM_001194428 | FEM1B      | NM_001266272 | RHOJ      | NM_001260613  |
| FBXW7     | NM_001257948 | GTF2H2      | NM_001260580 | GPX3        | NM_001159300 | GLCE       | NM_001266557 | ZBTB25    | NM_001194209  |
| ARFIP1    | NM_001266175 | CARTPT      | NM_001265877 | GLRA1       | NM_001194497 | SENP8      | NM_001193847 | GPX2      | NM_001115137  |
| MND1      | NM_001258106 | MAP1B       | NM_001265687 | SAP30L      | NM_001261790 | HEXA       | NM_001261529 | FTNB      | NM_001257705  |
| TLR2      | NM_001130425 | UTP15       | NM_001260832 | MRPL22      | NM_001194584 | NEO1       | NM_001261500 | MAX       | NM_001261369  |
| LRAT      | NM_001193939 | FAM169A     | NM_001194120 | ITK         | NM_001266444 | PML        | NM_001042434 | FAM71D    | NM_001194896  |
| NPY2R     | NM_001032832 | AGGF1       | NM_001261037 | CYFIP2      | NM_001194296 | SEMA7A     | NM_001266762 | TMEM229B  | NM_001194355  |
| GLRB      | NM_001266452 | LHFP2L      | NM_001194391 | C5orf40     | NM_001194600 | CSK        | NM_001261636 | ARG2      | NM_001261253  |
| GRIA2     | NM_001185014 | IMPACT      | NM_001266051 | UBLCP1      | NM_001266391 | COX5A      | NM_001040279 | RHD12     | NM_001194401  |
| FAM198B   | NM_001266338 | HOMER1      | NM_001261570 | TTC1        | NM_001266114 | SCAMP5     | NM_001260562 | DCAF5     | NM_001257649  |
| TMEM144   | NM_001266261 | PAPD4       | NM_001261739 | PTTG1       | NM_001195222 | ETFA       | NM_001261119 | KIAA0247  | NM_001194447  |
| C5H4orf46 | NM_001257669 | FAM151B     | NM_001194307 | GABRB2      | NM_001168328 | TPSPAN3    | NM_001260729 | PCNX      | NM_001260747  |
| NPY1R     | NM_001032866 | RPS23       | NM_001193580 | GABRG2      | NM_001261778 | CIB2       | NM_001257882 | SIPA1L1   | NM_001266525  |
| C5H4orf43 | NM_001266649 | CNHN        | NM_001266446 | RARS        | NM_001261218 | FAH        | NM_001257529 | RGS6      | NM_001265721  |
| CPE       | NM_001258081 | MEF2C       | NM_001266447 | FAM196B     | NM_001193931 | MESDC1     | NM_001194462 | DCAF4     | NM_001258114  |
| CBR4      | NM_001193693 | CETN3       | NM_001266092 | KCNMB1      | NM_001266453 | IL16       | NM_001032808 | PSEN1     | NM_001266480  |
| MFAP3L    | NM_001266355 | ARRDC3      | NM_001260940 | FBXW11      | NM_001261308 | STARD5     | NM_001260916 | ACOT6     | NM_001171952  |
| SAP30     | NM_001266332 | FAM172A     | NM_001193887 | UBT2D       | NM_001194090 | C7H15orf40 | NM_001261261 | ELMSAN1   | NM_001257926  |
| GPM6A     | NM_001265765 | GLRX        | NM_001198722 | DUSP1       | NM_001257450 | CPBE1      | NM_001260826 | VRTN      | NM_001194898  |

Supplemental Table 1: ( $i_j$ ) H3K4me3-enriched genes in the Baboon SVZ NSC population

| Gene Name   | RefSeq ID    | Gene Name   | RefSeq ID    | Gene Name  | RefSeq ID    | Gene Name | RefSeq ID    | Gene Name   | RefSeq ID    |
|-------------|--------------|-------------|--------------|------------|--------------|-----------|--------------|-------------|--------------|
| CCDC85B     | NM_001261659 | ENDOD1      | NM_001260700 | KLF4       | NM_001142793 | TEX19     | NM_001194590 | ST8SIA5     | NM_001083950 |
| FAM89B      | NM_001194782 | SESN3       | NM_001266247 | RAD23B     | NM_001261788 | FN3KRP    | NM_001194815 | SMAD2       | NM_001266803 |
| FRMD8       | NM_001260904 | MTMR2       | NM_001257894 | TAL2       | NM_001194446 | CRYL1     | NM_001266898 | C18H18orf32 | NM_001190838 |
| MRPL49      | NM_001266995 | JRKL        | NM_001265892 | OR13C8     | NM_001194361 | ZMYM2     | NM_001265737 | MAPK4       | NM_001265666 |
| DNAJC4      | NM_001257620 | BIRC2       | NM_001261321 | PPP3R2     | NM_001195420 | PSPC1     | NM_001257902 | SMAD4       | NM_001261090 |
| MACROD1     | NM_001194685 | DDI1        | NM_001194140 | ZNF189     | NM_001261609 | MTMR6     | NM_001267015 | TXNL1       | NM_001261708 |
| COX8A       | NM_001266102 | KIAA1826    | NM_001194188 | ALG2       | NM_001260984 | SHISA2    | NM_001193967 | LMAN1       | NM_001261072 |
| C14H11orf84 | NM_001194689 | AASDHPPPT   | NM_001171189 | GALNT12    | NM_001194577 | PRHOXNB   | NM_001194734 | PMaip1      | NM_001260640 |
| C14H11orf83 | NM_001261292 | ELMOD1      | NM_001266487 | TMOD1      | NM_001265684 | POMP      | NM_001257806 | RNF152      | NM_001193834 |
| GANAB       | NM_001194711 | C14H11orf65 | NM_001194273 | EXOSC3     | NM_001257940 | SLC7A1    | NM_001266615 | KDSR        | NM_001257943 |
| FADS2       | NM_001194717 | C14H11orf87 | NM_001194288 | ZBTB5      | NM_001261623 | UBL3      | NM_001257793 | SERPINB10   | NM_001194818 |
| C14H11orf10 | NM_001244602 | GPHN        | NM_001257815 | CCIN       | NM_001198698 | KATNAL1   | NM_001194119 | TXN3        | NM_001266505 |
| C14H11orf9  | NM_001194718 | C14H11orf1  | NM_001194787 | GLIPR2     | NM_001266729 | ALOX5AP   | NM_001266489 | DOK6        | NM_001266038 |
| PRPF19      | NM_001261081 | HSPB2       | NM_001194788 | RUSC2      | NM_001266666 | RXF2P2    | NM_001195757 | CD226       | NM_001042643 |
| MS4A7       | NM_001261147 | C14H11orf57 | NM_001194375 | FANCG      | NM_001266530 | STARD13   | NM_001261243 | NETO1       | NM_001257852 |
| APLNr       | NM_001047126 | TEX12       | NM_001194392 | AQP3       | NM_001258043 | RFC3      | NM_001266801 | C18orf55    | NM_001193707 |
| ORA47       | NM_001194088 | PTS         | NM_001266614 | SMU1       | NM_001265906 | MAB21L1   | NM_001194220 | CNDP2       | NM_001257758 |
| CHRM4       | NM_001194555 | ZBTB16      | NM_001257623 | TMEM215    | NM_001194216 | RFXAP     | NM_001265913 | PQLC1       | NM_001265722 |
| PHF21A      | NM_001265672 | REXO2       | NM_001193813 | C4H6orf203 | NM_001266984 | EXOSC8    | NM_001260538 | TXNL4A      | NM_001260866 |
| SLC35C1     | NM_001258150 | BACE1       | NM_001260928 | C15H9orf72 | NM_001257526 | STOML3    | NM_001193787 | RNF126      | NM_001261265 |
| CHST1       | NM_001265911 | FXYD6       | NM_001260855 | MOB3B      | NM_001261049 | LHPF      | NM_001261616 | GPX4        | NM_001118889 |
| TSPAN18     | NM_001266877 | SCN2B       | NM_001195475 | PLAA       | NM_001260548 | ELF1      | NM_001260954 | ATP5D       | NM_001261689 |
| ACCS        | NM_001260528 | ARCN1       | NM_001265905 | CAAP1      | NM_001194328 | C13orf15  | NM_001193922 | CIRBP       | NM_001261316 |
| C14H11orf74 | NM_001267023 | DPAGT1      | NM_001257856 | TUSC1      | NM_001265623 | C13orf31  | NM_001193989 | GAMT        | NM_001261132 |
| TRIM44      | NM_001260523 | USP2        | NM_001265896 | ELAVL2     | NM_001261000 | GTFF2F2   | NM_001266711 | UQCRR       | NM_001257804 |
| SLC12A2     | NM_001261669 | THY1        | NM_001042638 | MTAP       | NM_001261737 | LCP1      | NM_001266307 | FAM108A1    | NM_001267030 |
| ELF5        | NM_001194687 | TBCEL       | NM_001266372 | KLHL9      | NM_001194799 | ESD       | NM_001257479 | SLC39A3     | NM_001190948 |
| LMO2        | NM_001266207 | SC5DL       | NM_001257517 | PTPLAD2    | NM_001194139 | HTR2A     | NM_001032966 | S1PR4       | NM_001266185 |
| CSTF3       | NM_001257622 | UBASH3B     | NM_001261286 | RRAGA      | NM_001194800 | MED4      | NM_001265782 | E2F2        | NM_001265796 |
| QSER1       | NM_001257718 | SCN3B       | NM_001194283 | SNAPC3     | NM_001260804 | RB1       | NM_001261047 | TNFAIP8L1   | NM_001193682 |
| PAX6        | NM_001266257 | OR4D5       | NM_001194427 | CER1       | NM_001194495 | LPAR6     | NM_001194165 | KDM4B       | NM_001266448 |
| DNAJC24     | NM_001261745 | ESAM        | NM_001257484 | PDCD1LG2   | NM_001083599 | ARL11     | NM_001194262 | VIMAC       | NM_001193782 |
| MPPED2      | NM_001261498 | ST3GAL4     | NM_001266675 | JAK2       | NM_001265901 | ALG11     | NM_001190890 | SLC25A23    | NM_001257915 |
| ARL14EP     | NM_001261159 | BARX2       | NM_001194603 | RCL1       | NM_001257757 | PCDH17    | NM_001265711 | CRB3        | NM_001266081 |
| LINC7       | NM_001266451 | TMEM45B     | NM_001194533 | SLC1A1     | NM_001265831 | PCDH9     | NM_001258186 | MCOLN1      | NM_001260540 |
| FIBIN       | NM_001193892 | VPS26B      | NM_001257745 | CBWD1      | NM_001193953 | KLHL1     | NM_001195300 | CD209       | NM_001033089 |
| ANO3        | NM_001265904 | ZMYND19     | NM_001194731 | PTAR1      | NM_001265943 | KLF12     | NM_001258129 | RAB11B      | NM_001261484 |
| SVIP        | NM_001261697 | C15H9orf142 | NM_001193927 | KLF9       | NM_001265918 | TBC1D4    | NM_001172423 | ACTL9       | NM_001194016 |
| GAS2        | NM_001257624 | INPP5E      | NM_001194013 | CYP1D1     | NM_001246671 | UCHL3     | NM_001266166 | OR1M1       | NM_001194210 |
| MRGPRX2     | NM_001040422 | NAACC2      | NM_001261341 | RORB       | NM_001260751 | KCTD12    | NM_001266392 | OR7M4       | NM_001168329 |
| LOC696844   | NM_001202444 | BRD3        | NM_001194118 | NMRK1      | NM_001261283 | FBXL3     | NM_001261635 | ZNF177      | NM_001266619 |
| RPS13       | NM_001265917 | VAV2        | NM_001265633 | GNA14      | NM_001265908 | SLITRK1   | NM_001260787 | UBL5        | NM_001261050 |
| C14H11orf58 | NM_001193864 | SURF4       | NM_001194793 | TLE1       | NM_001265628 | SLITRK5   | NM_001265627 | PPAN        | NM_001204429 |
| SPON1       | NM_001266118 | GTF3C4      | NM_001260973 | GKAP1      | NM_001266459 | DNAJC3    | NM_001266404 | P2RY11      | NM_001204430 |
| BTBD10      | NM_001265857 | NTNG2       | NM_001265764 | NTRK2      | NM_001261297 | RAP2A     | NM_001193832 | ICAM3       | NM_001195749 |
| ARNTL       | NM_001257837 | MED27       | NM_001266508 | NAA35      | NM_001194389 | STK24     | NM_001266859 | C19H19orf52 | NM_001194256 |
| DKK3        | NM_001265749 | UCK1        | NM_001194319 | DAPK1      | NM_001257788 | SLC15A1   | NM_001032899 | ACP5        | NM_001258183 |
| RNF141      | NM_001266485 | AIF1L       | NM_001194341 | CDK20      | NM_001032925 | UBAC2     | NM_001171176 | C19orf56    | NM_001194406 |
| SWAP70      | NM_001172414 | C15H9orf78  | NM_001267022 | SHC3       | NM_001265690 | TEX30     | NM_001266631 | TNPO2       | NM_001261575 |
| C11orf17    | NM_001194219 | METTL11A    | NM_001266620 | CKS2       | NM_001267543 | ARGLU1    | NM_001194022 | C19H19orf43 | NM_001194424 |
| RPL27A      | NM_001193567 | CRAT        | NM_001261113 | GADD45G    | NM_001193910 | ANKRD10   | NM_001257442 | JUNB        | NM_001194461 |
| RIC3        | NM_001261177 | SH3GLB2     | NM_001266269 | NAIF1      | NM_001193947 | F7        | NM_001080136 | CALR        | NM_001261131 |
| OR10A4      | NM_001190742 | LRRC8A      | NM_001257576 | FAM102A    | NM_001266645 | F10       | NM_001104584 | STX10       | NM_001261693 |
| TAF10       | NM_001265786 | URM1        | NM_001266132 | ANGPTL2    | NM_001109811 | CDC16     | NM_001266466 | IER2        | NM_001260634 |
| OR52W1      | NM_001194213 | PSMB7       | NM_001265663 | SYK        | NM_001261035 | MCSR      | NM_001193897 | NDUFB7      | NM_001194515 |
| TRIM22      | NM_001113359 | LHX2        | NM_001261792 | AUH        | NM_001257675 | LDLRAD4   | NM_001266659 | AKAP8L      | NM_001260986 |
| HBE1        | NM_001047147 | STRBP       | NM_001261080 | NFIL3      | NM_001266913 | PSMG2     | NM_001193620 | AP1M1       | NM_001257538 |
| OR51G2      | NM_001194547 | ZBTB26      | NM_001261685 | CENPP      | NM_001194801 | CHMP1B    | NM_001194816 | SLC35E1     | NM_001266345 |
| OR52M1      | NM_001194566 | OR1Q1       | NM_001193814 | BICD2      | NM_001257956 | NAPG      | NM_001258101 | USE1        | NM_001257921 |
| RHOQ        | NM_001194601 | RBM18       | NM_001260865 | NINJ1      | NM_001194415 | RAB31     | NM_001266436 | ABHD8       | NM_001265784 |
| LRTOMT      | NM_001199354 | STOM        | NM_001266229 | HIATL1     | NM_001194284 | NDUFV2    | NM_001257585 | MRPL34      | NM_001193420 |
| C11orf59    | NM_001194634 | RAB14       | NM_001194795 | FBP1       | NM_001193652 | ZFP161    | NM_001265870 | INSL3       | NM_001204361 |
| PDE2A       | NM_001130826 | TRAF1       | NM_001265893 | HSD17B3    | NM_001266504 | SMCHD1    | NM_001258166 | PIK3R2      | NM_001258052 |
| FCHSD2      | NM_001265957 | DBC1        | NM_001260978 | GLOD4      | NM_001265952 | TYMS      | NM_001195507 | SUGP1       | NM_001261744 |
| FAM168A     | NM_001194786 | TLR4        | NM_001037092 | INPP5K     | NM_001260646 | PHACTR1   | NM_001260596 | LYRM2       | NM_001265787 |
| PGM2L1      | NM_001265664 | TRIM32      | NM_001261350 | TLCD2      | NM_001194730 | GFOD1     | NM_001266214 | GJA10       | NM_001193951 |
| OR2AT4      | NM_001193723 | TNFSF8      | NM_001266670 | CYB5D2     | NM_001193968 | CD83      | NM_001261335 | FUT9        | NM_001194065 |
| SERPINH1    | NM_001261087 | C15H9orf91  | NM_001194142 | MED11      | NM_001194014 | MYLIP     | NM_001261795 | HLX32       | NM_001261738 |
| NDUFC2      | NM_001266174 | POLE3       | NM_001257857 | PSMB6      | NM_001195714 | CAP2      | NM_001266532 | FBXL4       | NM_001266033 |
| FAM181B     | NM_001194034 | HDHD3       | NM_001194198 | SLC25A11   | NM_001265923 | NUP153    | NM_001261594 | FACH        | NM_001266112 |
| RAB30       | NM_001261123 | SLC31A1     | NM_001257506 | RPAIN      | NM_001194178 | RNF144B   | NM_001265699 | MCHR2       | NM_001032948 |
| CCDC90B     | NM_001260811 | KIAA1958    | NM_001194796 | WSCD1      | NM_001257765 | ID4       | NM_001265656 | DCUN1D1     | NM_001257454 |
| TMEM126B    | NM_001267027 | HSDL2       | NM_001199126 | XAF1       | NM_001194803 | PRL       | NM_001047128 | POPC3       | NM_001257913 |
| PICALM      | NM_001266499 | UGCG        | NM_001257723 | KCTD11     | NM_001194377 | NRSN1     | NM_001257709 | PREP        | NM_001257914 |
| FZD4        | NM_001266875 | DNAJC25     | NM_001204971 | TNFSF12    | NM_001205135 | ACOT13    | NM_001171950 | QRSL1       | NM_001257501 |
| CTSC        | NM_001195651 | C15H9orf152 | NM_001194353 | TMEM107    | NM_001194554 | GMNN      | NM_001258199 | SOBP        | NM_001104534 |
| C14H11orf75 | NM_001193371 | AKAP2       | NM_001204120 | MFSD6L     | NM_001194592 | CMAH      | NM_001032856 | SEC63       | NM_001266833 |
| FOLR4       | NM_001193805 | C9orf4      | NM_001194376 | RCVRN      | NM_001194602 | HIST1H1A  | NM_001193709 | GTF2H5      | NM_001190969 |
| PIWIL4      | NM_001195514 | FAM206A     | NM_001260843 | TMEM220    | NM_001194807 | HIST1H1T  | NM_001080761 | ZDHHC14     | NM_001266260 |
| SLC9A3R1    | NM_001266178 | SNRPD1      | NM_001260829 | LPAR2      | NM_001266718 | HIST1H1D  | NM_001193819 | TFB1M       | NM_001261482 |
| CDR2L       | NM_001266027 | RBBP8       | NM_001258203 | PLEKHF1    | NM_001193737 | ZNF322A   | NM_001265932 | CKNSR3      | NM_001265835 |
| HN1         | NM_001039945 | SS18        | NM_001257494 | ZNF507     | NM_001260941 | HIST1H1B  | NM_001194063 | IPCEF1      | NM_001257599 |
| MRPS7       | NM_001261058 | AQP4        | NM_001257671 | PDCD5      | NM_001265692 | GPX6      | NM_001159358 | MYCT1       | NM_001194146 |
| KIAA0195    | NM_001265878 | CHST9       | NM_001261472 | KCTD15     | NM_001266955 | GPX5      | NM_001159302 | C4H6orf211  | NM_001257928 |
| ACOX1       | NM_001265969 | TTR         | NM_001261679 | LSM14A     | NM_001257954 | TRIM27    | NM_001260792 | ZBTB2       | NM_001258066 |
| SEC14L1     | NM_001258116 | B4GALT6     | NM_001257591 | KIAA0355   | NM_001193886 | GABBR1    | NM_001261276 | GINM1       | NM_001193728 |
| TNRC6C      | NM_001260746 | NOL4        | NM_001194221 | SCN1B      | NM_001258167 | MOG       | NM_001194863 | TAB2        | NM_001257790 |
| SOC53       | NM_001194326 | MAPRE2      | NM_001194241 | FAM187B    | NM_001193997 | RPP21     | NM_001047138 | UST         | NM_001257513 |
| CYTH1       | NM_001261797 | ZNF24       | NM_001266015 | HCST       | NM_001032835 | NRM       | NM_001105167 | G6orf103    | NM_001193764 |
| TBC1D16     | NM_001266638 | GALNT1      | NM_001260602 | POLR2I     | NM_001266627 | MDC1      | NM_001114947 | RAB32       | NM_001193894 |
| NPTX1       | NM_001266044 | RPRD1A      | NM_001260968 | COX7AH     | NM_001040278 | FLOT1     | NM_001105168 | FBXO30      | NM_001261073 |
| C16H17orf70 | NM_001194508 | C18orf10    | NM_001260587 | ZNF790     | NM_001261671 | LSM2      | NM_001260685 | STX11       | NM_001260831 |

Supplemental Table 1: (*i<sub>e</sub>*) H3K4me3-enriched genes in the Baboon SVZ NSC population

| Gene Name | RefSeq ID    | Gene Name   | RefSeq ID    | Gene Name  | RefSeq ID    | Gene Name  | RefSeq ID    | Gene Name  | RefSeq ID    |
|-----------|--------------|-------------|--------------|------------|--------------|------------|--------------|------------|--------------|
| SIRT7     | NM_001257960 | RIT2        | NM_001257707 | ZNF345     | NM_001194827 | FKBPL      | NM_001194632 | PLAGL1     | NM_001260788 |
| PYCR1     | NM_001265983 | ATP5A1      | NM_001266412 | SPINT2     | NM_001194343 | SLC39A7    | NM_001261144 | AIG1       | NM_001260585 |
| ACTN4     | NM_001261802 | CXCL13      | NM_001032880 | UXNL1      | NM_001114959 | VTA1       | NM_001261520 | UBXN2B     | NM_001261602 |
| NFKBIB    | NM_001258157 | CCNI        | NM_001195445 | TAPBP      | NM_001261727 | ABRACL     | NM_001193359 | CYP7A1     | NM_001193803 |
| MED29     | NM_001266603 | STBD1       | NM_001194876 | CUTA       | NM_001265646 | HEBP2      | NM_001194081 | TOX        | NM_001261489 |
| SUPT5H    | NM_001266951 | PARM1       | NM_001266923 | NUDT3      | NM_001194714 | TNFAIP3    | NM_001261344 | CAB8       | NM_001261295 |
| DYRK1B    | NM_001266667 | MTHFD2L     | NM_001193907 | RPL10A     | NM_001266226 | IFNGR1     | NM_001266300 | RAB2A      | NM_001193860 |
| AKT2      | NM_001265989 | IL8         | NM_001032965 | KCTD20     | NM_001257899 | TCF21      | NM_001260958 | CLVS1      | NM_001265738 |
| PLD3      | NM_001265817 | ALB         | NM_001195649 | PI16       | NM_001266318 | MOXD1      | NM_001265792 | GGH        | NM_001260712 |
| CYP2B6    | NM_001040212 | DCK         | NM_001257554 | CCDC167    | NM_001261613 | MED23      | NM_001261479 | PDE7A      | NM_001266863 |
| MIA       | NM_001261282 | IGJ         | NM_001260886 | GLO1       | NM_001261764 | C4H6orf58  | NM_001194318 | ARFGF1     | NM_001261046 |
| EGLN2     | NM_001261091 | SULT1B1     | NM_001193512 | CKNK17     | NM_001194723 | CENPW      | NM_001193377 | RDH10      | NM_001266830 |
| B9D2      | NM_001261075 | UGT2A3      | NM_001194387 | TFEB       | NM_001266320 | HEY2       | NM_001194380 | UBE2W      | NM_001266510 |
| GSK3A     | NM_001266636 | STAP1       | NM_001194445 | PTCRA      | NM_001193837 | CLVS2      | NM_001194395 | PI15       | NM_001193804 |
| PAFAH1B3  | NM_001257280 | LPHN3       | NM_001261704 | GTPBP2     | NM_001266862 | GJA1       | NM_001261067 | PKTA       | NM_001193422 |
| PRR19     | NM_001194317 | POLR2B      | NM_001261497 | MRPS18A    | NM_001257635 | ASF1A      | NM_001194486 | IL7        | NM_001032846 |
| ZNF428    | NM_001270769 | SRP72       | NM_001260722 | SLC29A1    | NM_001257896 | PLN        | NM_001190894 | STMN2      | NM_001265775 |
| C19orf61  | NM_001194356 | PPAT        | NM_001260819 | SUPT3H     | NM_001266569 | SLC35F1    | NM_001266534 | MRPS28     | NM_001261089 |
| PVR       | NM_001043386 | EXOC1       | NM_001261145 | ENPP4      | NM_001266236 | NUS1       | NM_001194492 | TPD52      | NM_001266142 |
| GEMIN7    | NM_001194715 | SRD5A3      | NM_001257949 | CD2AP      | NM_001266309 | FAM162B    | NM_001194873 | ZNF704     | NM_001260976 |
| OPA3      | NM_001258146 | KIT         | NM_001266095 | MUT        | NM_001261561 | RWDD1      | NM_001266855 | PMP2       | NM_001266305 |
| SNRPD2    | NM_001193592 | CHIC2       | NM_001257545 | RHAG       | NM_001032815 | COL10A1    | NM_001194546 | CHMP4C     | NM_001193985 |
| PPP5C     | NM_001266086 | USP46       | NM_001266963 | DEFB114    | NM_001193390 | NT5DC1     | NM_001261622 | RALYL      | NM_001260167 |
| AP2S1     | NM_001261143 | MAPK10      | NM_001260857 | IL17F      | NM_001261287 | HS3ST5     | NM_001193687 | CA2        | NM_001195417 |
| EMP3      | NM_001194829 | PPM1K       | NM_001266195 | TRAM2      | NM_001260535 | C4H6orf225 | NM_001193364 | DCAF4L2    | NM_001198702 |
| CYTH2     | NM_001260891 | NAP1L5      | NM_001266934 | GSTA4      | NM_001258102 | TRAF3IP2   | NM_001266136 | NBN        | NM_001265739 |
| RPL13A    | NM_001195419 | HPGDS       | NM_001194212 | FBXO9      | NM_001160298 | SLC16A10   | NM_001260620 | LOC696190  | NM_001261304 |
| IZUMO2    | NM_001194696 | BMPR1B      | NM_001266263 | GCLC       | NM_001261107 | RPF2       | NM_001258154 | LRRRC69    | NM_001193750 |
| LRRRC4B   | NM_001266779 | TSPAN5      | NM_001194290 | LRRC1      | NM_001266506 | C6orf186   | NM_001193830 | TRIQK      | NM_001265814 |
| SIGLEC1   | NM_001194706 | E1F4E       | NM_001266219 | FAM83B     | NM_001194454 | CDC40      | NM_001261343 | FAM92A1    | NM_001265930 |
| ZNF175    | NM_001261030 | METAP1      | NM_001261513 | BEND6      | NM_001257859 | FIG4       | NM_001172433 | TP53INP1   | NM_001265680 |
| PPP2R1A   | NM_001257922 | MAPKSP1     | NM_001257535 | PRIM2      | NM_001266600 | SMPD2      | NM_001266860 | PLEKHF2    | NM_001193870 |
| PRPF31    | NM_001266103 | DDIT4L      | NM_001194403 | UBE2E3     | NM_001257571 | CEP57L1    | NM_001193486 | C8H8orf37  | NM_001193893 |
| RPS9      | NM_001265659 | PPP3CA      | NM_001261563 | LMBRD1     | NM_001194516 | SNX3       | NM_001257953 | PTDSS1     | NM_001257822 |
| FCAR      | NM_001039950 | NFKB1       | NM_001266053 | C4H6orf57  | NM_001194396 | NR2E1      | NM_001265967 | SDC2       | NM_001260964 |
| NLRP7     | NM_001114354 | UBE2D3      | NM_001261204 | KCNQ5      | NM_001265828 | OSTM1      | NM_001261748 | FAM188A    | NM_001193862 |
| COX6B2    | NM_001193383 | TACR3       | NM_001037862 | SLC17A5    | NM_001260632 | SOD2       | NM_001032805 | C1QL3      | NM_001265799 |
| UBE2S     | NM_001266004 | INTS12      | NM_001260673 | MYO6       | NM_001104536 | WTAP       | NM_001260846 | PTPLA      | NM_001193912 |
| ZNF581    | NM_001194834 | SGMS2       | NM_001193740 | IRAK1BP1   | NM_001194610 | PACRG      | NM_001266357 | ANL5B      | NM_001193479 |
| NLRP11    | NM_001114109 | HADH        | NM_001261209 | LCA5       | NM_001266344 | BRP44L     | NM_001260570 | DNAJC1     | NM_001261677 |
| NLRP8     | NM_001114115 | PLA2G12A    | NM_001194877 | ELOVL4     | NM_001040419 | RNASET2    | NM_001266725 | COMMD3     | NM_001195447 |
| ESP16.9   | NM_001171845 | ENPEP       | NM_001266656 | TPBG       | NM_001193701 | CCR6       | NM_001032935 | THNSL1     | NM_001266425 |
| ZNF805    | NM_001194103 | NEUROG2     | NM_001193972 | PRSS35     | NM_001048244 | PSMB1      | NM_001260636 | GAD2       | NM_001265854 |
| ZNF304    | NM_001261557 | NDST3       | NM_001266899 | CYB5R4     | NM_001193767 | GPR78      | NM_001193900 | ARHGAP12   | NM_001260799 |
| ZNF671    | NM_001260628 | METTL14     | NM_001261720 | SNX14      | NM_001257900 | GRPEL1     | NM_001261551 | NRP1       | NM_001265816 |
| ZSCAN1    | NM_001190963 | NDNF        | NM_001193470 | SYNCRIP    | NM_001193845 | KIAA0232   | NM_001193917 | CUL2       | NM_001257552 |
| ZBTB45    | NM_001266696 | TMEM155     | NM_001194154 | POLR1D     | NM_001257459 | MRFAP1L1   | NM_001193928 | CCNY       | NM_001257490 |
| CHMP2A    | NM_001194122 | IL21        | NM_001194242 | SLC35A1    | NM_001266759 | MRFAP1     | NM_001193938 | CSGALNACT2 | NM_001172170 |
| GBE1      | NM_001266287 | SPRY1       | NM_001194270 | CNR1       | NM_001032825 | JAKMIP1    | NM_001257961 | HNRNPF     | NM_001261015 |
| CHMP2B    | NM_001266802 | ANKRD50     | NM_001266441 | PNRC1      | NM_001266366 | CYTL1      | NM_001194003 | ZNF32      | NM_001260922 |
| POU1F1    | NM_001042860 | HERC4       | NM_001257578 | ANKRD6     | NM_001261717 | ZNF518B    | NM_001261812 | CXCL12     | NM_001032934 |
| CGGBP1    | NM_001261776 | LRRTM3      | NM_001266575 | SPAG11B    | NM_001110257 | MTDH       | NM_001266369 | DRGX       | NM_001194598 |
| PROS1     | NM_001044726 | REEP3       | NM_001261663 | CTSB       | NM_001194899 | STK3       | NM_001260967 | C10orf72   | NM_001194390 |
| ARL6      | NM_001257760 | NRBF2       | NM_001261731 | DFDT1      | NM_001260724 | OSR2       | NM_001267000 | SNCG       | NM_001266560 |
| MINA      | NM_001261709 | ADO         | NM_001261626 | TNKS       | NM_001261281 | ANKRD46    | NM_001266498 | BMPR1A     | NM_001260593 |
| GPR15     | NM_001042647 | ZNF365      | NM_001257568 | TUSC3      | NM_001266279 | PABPC1     | NM_001257897 | GRID1      | NM_001257667 |
| CMSS1     | NM_001193902 | C9H10orf107 | NM_001194905 | CSGALNACT1 | NM_001261473 | NCALD      | NM_001257764 | TMEM254    | NM_001266368 |
| TOMM70A   | NM_001266153 | RHOBTB1     | NM_001266985 | FGF17      | NM_001194186 | KLF10      | NM_001266477 | PP1F       | NM_001266124 |
| TMEM45A   | NM_001266028 | CDK1        | NM_001261470 | NUDT18     | NM_001190895 | BALC       | NM_001266643 | RPS24      | NM_001261027 |
| FAM55C    | NM_001194109 | UBE2D1      | NM_001257863 | REEP4      | NM_001266282 | SLC25A32   | NM_001266738 | KCNMA1     | NM_001032810 |
| ALCAM     | NM_001257702 | MBL2        | NM_001105535 | KIAA1967   | NM_001194900 | LRP12      | NM_001261683 | VDAC2      | NM_001257424 |
| CD47      | NM_001266517 | CSTF2T      | NM_001266798 | PEBP4      | NM_001190951 | ANGPT1     | NM_001266116 | CHCHD1     | NM_001258084 |
| IFT57     | NM_001258196 | SGMS1       | NM_001257652 | NKX3-1     | NM_001266223 | EMC2       | NM_001257604 | ANAPC16    | NM_001257658 |
| ABHD10    | NM_001261502 | PTEN        | NM_001260965 | NEFL       | NM_001265845 | SYBU       | NM_001265668 | C9H10orf54 | NM_001190878 |
| CD200     | NM_001257544 | GNRH1       | NM_001261017 | GNRH1      | NM_001194536 | UTP23      | NM_001193908 | LRRC20     | NM_001194412 |
| ATP6V1A   | NM_001260658 | FAS         | NM_001032933 | BNIP3L     | NM_001037284 | MED30      | NM_001266097 | H2AFY2     | NM_001266414 |
| HS3ST1    | NM_001194098 | PPP1R3C     | NM_001257737 | ADRA1A     | NM_001114733 | EXT1       | NM_001258133 | TSPAN15    | NM_001266979 |
| RAB28     | NM_001265724 | TNKS2       | NM_001266258 | TRIM35     | NM_001257556 | NOV        | NM_001266896 | SRGN       | NM_001261094 |
| NKX3-2    | NM_001194111 | CYP26A1     | NM_001193915 | CCDC25     | NM_001266572 | TAZF       | NM_001266380 | CNOT6L     | NM_001261293 |
| CD38      | NM_001261773 | LGI1        | NM_001261057 | PNOC       | NM_001261798 | MRPL13     | NM_001258083 | RGS10      | NM_001261654 |
| PROM1     | NM_001077420 | HELLS       | NM_001261757 | FZD3       | NM_001261141 | DERL1      | NM_001257937 | FAM110B    | NM_001193942 |
| LDB2      | NM_001265886 | CYP2C76     | NM_001177788 | LEPROTL1   | NM_001266983 | FBXO32     | NM_001257729 | ACBD7      | NM_001258175 |
| LAP3      | NM_001260698 | DNTT        | NM_001266694 | GTF2E2     | NM_001260927 | RNF139     | NM_001261771 | ATG4A      | NM_001261491 |
| LCORL     | NM_001172360 | PIK3AP1     | NM_001266956 | MAK16      | NM_001260675 | TRIB1      | NM_001193695 | NXT2       | NM_001265707 |
| DHX15     | NM_001260731 | UBTD1       | NM_001194274 | RNF122     | NM_001266604 | MYC        | NM_001142873 | RGAG1      | NM_001190875 |
| SOD3      | NM_001194332 | AVP11       | NM_001266977 | DUSP26     | NM_001257818 | FAM49B     | NM_001261694 | CHRDL1     | NM_001257873 |
| ANAPC4    | NM_001266920 | GOLGA7B     | NM_001260720 | ERLIN2     | NM_001257541 | ST3GAL1    | NM_001261634 | LHFPL1     | NM_001265846 |
| TBC1D19   | NM_001260783 | NDUFB8      | NM_001265766 | FGFR1      | NM_001266647 | CHRAC1     | NM_001266669 | HNRNPH2    | NM_001193993 |
| C5H4orf19 | NM_001257674 | C9H10orf2   | NM_001194441 | TM2D2      | NM_001260764 | PTP4A3     | NM_001193694 | PLS3       | NM_001266221 |
| TBC1D1    | NM_001258065 | LBX1        | NM_001194466 | SFRP1      | NM_001261734 | LYNX1      | NM_001266622 | WDR44      | NM_001266328 |
| KLF3      | NM_001261280 | ELOVL3      | NM_001194552 | GOLGA7     | NM_001194104 | GPIHBP1    | NM_001266526 | ZCCHC12    | NM_001261787 |
| TLR10     | NM_001130434 | ACTR1A      | NM_001257775 | GINS4      | NM_001261222 | TSTA3      | NM_001261649 | PGRMC1     | NM_001194918 |
| WDR19     | NM_001266872 | SFXN2       | NM_001261167 | IKBKKB     | NM_001265946 | LRRC14     | NM_001260995 | ZBTB33     | NM_001266950 |
| RHOH      | NM_001260809 | C9H10orf32  | NM_001194906 | SLC20A2    | NM_001266611 | ZNF7       | NM_001266571 | LAMP2      | NM_001260808 |
| TMEM33    | NM_001261135 | NT5C2       | NM_001257875 | THAP1      | NM_001257879 | ZNF250     | NM_001267795 | C1GALT1C1  | NM_001260840 |
| ATP8A1    | NM_001265879 | OBFC1       | NM_001266590 | MCM4       | NM_001266203 | ZMYND11    | NM_001261702 | SH2D1A     | NM_001032837 |
| GRXCR1    | NM_001194126 | GSTO1       | NM_001260555 | UBE2V2     | NM_001266843 | LARP4B     | NM_001260689 | CXHorf64   | NM_001193842 |
| GNPDA2    | NM_001194875 | XPNPEP1     | NM_001266962 | EFCAB1     | NM_001194172 | WDR37      | NM_001260851 | OCLR       | NM_001265789 |
| GABRA2    | NM_001261668 | MXI1        | NM_001261031 | SNAI2      | NM_001260982 | AKR1E2     | NM_001194235 | SASH3      | NM_001261510 |
| COMMD8    | NM_001260885 | PDCD4       | NM_001257846 | PCMTD1     | NM_001260718 | IL2RA      | NM_001032917 | CXHorf57   | NM_001193976 |
| SLAIN2    | NM_001266145 | SHOC2       | NM_001257588 | FAM150A    | NM_001194437 | PRKCQ      | NM_001261312 | MORC4      | NM_001266454 |
| OClAD2    | NM_001266991 | GPAM        | NM_001266771 | RB1CC1     | NM_001266144 | KIN        | NM_001261813 | TSC2D23    | NM_001266233 |

Supplemental Table 1: (*i<sub>r</sub>*) H3K4me3-enriched genes in the Baboon SVZ NSC population

| Gene Name | RefSeq ID    | Gene Name | RefSeq ID    | Gene Name  | RefSeq ID    | Gene Name   | RefSeq ID    | Gene Name   | RefSeq ID    |
|-----------|--------------|-----------|--------------|------------|--------------|-------------|--------------|-------------|--------------|
| SCD5      | NM_001193798 | AFAP1L2   | NM_001261664 | NPBWR1     | NM_001194227 | USP6NL      | NM_001257435 | PCYT1B      | NM_001258192 |
| HNRPDL    | NM_001260709 | CCDC172   | NM_001193986 | TCEA1      | NM_001260708 | CCDC3       | NM_001193755 | CCAF8L2     | NM_001266964 |
| GK2       | NM_001193898 | EMX2      | NM_001266139 | SDR16C5    | NM_001260736 | PRPF18      | NM_001260784 | MAGEB10     | NM_001193982 |
| PAQR3     | NM_001257693 | CACUL1    | NM_001266943 | IMPAD1     | NM_001257950 | DCLRE1C     | NM_001204350 | KLHL15      | NM_001257612 |
| HELT      | NM_001193735 | C6H5orf30 | NM_001194882 | CLK4       | NM_001257694 | SV2B        | NM_001260629 | KIAA1737    | NM_001265895 |
| SLC25A4   | NM_001258165 | NUDT12    | NM_001194123 | MGAT4B     | NM_001266822 | SLCO3A1     | NM_001261477 | POMT2       | NM_001260626 |
| PDLIM3    | NM_001266700 | EFNA5     | NM_001265728 | SQSTM1     | NM_001266358 | RGMA        | NM_001266917 | ADCK1       | NM_001266902 |
| CYP4V2    | NM_001193735 | SLC25A46  | NM_001266009 | RASGEF1C   | NM_001194225 | IGF1R       | NM_001261352 | DIO2        | NM_001159294 |
| FRG1      | NM_001261228 | STARD4    | NM_001260934 | OR2Y1      | NM_001194368 | TTC23       | NM_001266031 | TSHR        | NM_001195395 |
| SLC6A3    | NM_001032826 | NREP      | NM_001193355 | MGAT1      | NM_001257830 | MEF2A       | NM_001260914 | GTF2A1      | NM_001257710 |
| CCDC127   | NM_001194083 | DCP2      | NM_001266464 | NDN        | NM_001172102 | ASB7        | NM_001266289 | FLRT2       | NM_001266473 |
| MED10     | NM_001260853 | TSSK1B    | NM_001193468 | SNRPN      | NM_001261205 | OR4K13      | NM_001193841 | GALC        | NM_001044262 |
| PAPD7     | NM_001261299 | TRIM36    | NM_001266479 | GABRB3     | NM_001260702 | OR4K2       | NM_001193863 | KCNK10      | NM_001261558 |
| ADCY2     | NM_001265652 | FEM1C     | NM_001266537 | NDNL2      | NM_001257507 | PARP2       | NM_001257438 | TTC8        | NM_001260880 |
| C6H5orf49 | NM_001193716 | TMED7     | NM_001204339 | CHRNA7     | NM_001032883 | RNASE4      | NM_001261770 | TDP1        | NM_001257779 |
| SEMA5A    | NM_001266494 | CCO1      | NM_001260608 | SCG5       | NM_001260672 | OR4E2       | NM_001194074 | KCNK13      | NM_001261646 |
| CMBL      | NM_001193768 | TNFAIP8   | NM_001261083 | GREM1      | NM_001032848 | DAD1        | NM_001194131 | PSMC1       | NM_001266333 |
| DAP       | NM_001257566 | SRFBP1    | NM_001266668 | EMC4       | NM_001260989 | MRPL52      | NM_001265996 | NRDE2       | NM_001193888 |
| FAM105A   | NM_001193791 | CSNK1G3   | NM_001258050 | ZNF770     | NM_001261541 | PSMB11      | NM_001266866 | FBLN5       | NM_001260534 |
| FAM105B   | NM_001193800 | GRAMD3    | NM_001265990 | ATPBD4     | NM_001266595 | SLC22A17    | NM_001265660 | CPSF2       | NM_001257580 |
| ANKH      | NM_001261260 | MARCH3    | NM_001266413 | GPR176     | NM_001266154 | JPH4        | NM_001261095 | GOLGA5      | NM_001257502 |
| FBXL7     | NM_001266740 | C6H5orf63 | NM_001257797 | PLCB2      | NM_001267026 | PCK2        | NM_001265937 | C7H14orf142 | NM_001193961 |
| ZNF622    | NM_001260691 | CTXN3     | NM_001193387 | C7H15orf57 | NM_001194072 | TM9SF1      | NM_001266461 | KIAA1409    | NM_001194012 |
| FAM134B   | NM_001261775 | SLC12A2   | NM_001261785 | VPS18      | NM_001257653 | CMA1        | NM_001194633 | SERPINA5    | NM_001044733 |
| DROSHA    | NM_001261157 | KIAA1024L | NM_001194061 | PLA2G4B    | NM_001204226 | STXBP6      | NM_001260925 | DICER1      | NM_001257872 |
| C6H5orf22 | NM_001193783 | CDC42SE2  | NM_001257601 | CDAN1      | NM_001194310 | NOVA1       | NM_001261800 | GLRX5       | NM_001265635 |
| MTMR12    | NM_001266986 | IL3       | NM_001101734 | HYPK       | NM_001194889 | G2E3        | NM_001194652 | GSKIP       | NM_001194191 |
| TOMM40    | NM_001260795 | IRF1      | NM_001266397 | MFAP1      | NM_001266342 | DTD2        | NM_001194671 | VRK1        | NM_001257676 |
| RAD1      | NM_001261160 | IL13      | NM_001032929 | CTDSP2     | NM_001266809 | ARHGAP5     | NM_001198663 | C7H14orf177 | NM_001194226 |
| BRIX1     | NM_001261247 | LEAP2     | NM_001114110 | DUOXA2     | NM_001194505 | EGLN3       | NM_001194425 | SETD3       | NM_001260871 |
| LMBRD2    | NM_001266468 | SKP1      | NM_001193590 | MYEF2      | NM_001261256 | CFL2        | NM_001261184 | DIO3        | NM_001122649 |
| SLC1A3    | NM_001266066 | UBE2B     | NM_001194433 | EID1       | NM_001265838 | SRP54       | NM_001260852 | HSP90AA1    | NM_001195667 |
| PTGER4    | NM_001266046 | LECT2     | NM_001194884 | SECISBP2L  | NM_001258064 | INSM2       | NM_001198728 | TRMT61A     | NM_001257540 |
| ITTC3     | NM_001261196 | SPOCK1    | NM_001266535 | COPS2      | NM_001193601 | PAX9        | NM_001040417 | C7H14orf79  | NM_001193779 |
| PLCXD3    | NM_001260577 | FAM13B    | NM_001260948 | FGF7       | NM_001194613 | SLC25A21    | NM_001265644 | CRIP1       | NM_001266846 |
| C6H5orf51 | NM_001193823 | LRRTM2    | NM_001266604 | DTWD1      | NM_001260730 | SEC23A      | NM_001261363 | C6H8orf42   | NM_001265984 |
| SEPP1     | NM_001159409 | MATR3     | NM_001205238 | USP8       | NM_001265619 | TRAPPC6B    | NM_001261238 | CLN8        | NM_001194050 |
| NIM1      | NM_001266646 | MZB1      | NM_001260618 | TNFAIP8L3  | NM_001193689 | C7H14orf28  | NM_001190833 | AGPAT5      | NM_001257833 |
| NROB1     | NM_001195285 | RAB33A    | NM_001257646 | HSD17B10   | NM_001261171 | TAZ         | NM_001032914 | P2RY10      | NM_001258158 |
| CXHorf21  | NM_001194018 | RBMX2     | NM_001266848 | MAGED2     | NM_001257614 | G6PD        | NM_001266470 | JTM2A       | NM_001194217 |
| FTHL17    | NM_001194051 | MST4      | NM_001261722 | FAM104B    | NM_001261522 | H2AFB3      | NM_001193914 | FAM46D      | NM_001194232 |
| TMEM47    | NM_001266555 | GPC4      | NM_001265741 | MAGEH1     | NM_001260625 | MTCP1NB     | NM_001260781 | SH3BGR      | NM_001266350 |
| PRRG1     | NM_001261082 | CCDC160   | NM_001194097 | RRAGB      | NM_001257444 | MTCP1       | NM_001194094 | POU3F4      | NM_001194259 |
| DYNLT3    | NM_001266527 | PLAC1     | NM_001194091 | SPIN3      | NM_001260981 | RAB39B      | NM_001261511 | TGIF2LX     | NM_001032888 |
| TSPAN7    | NM_001261716 | FAM127A   | NM_001194127 | ZC4H2      | NM_001261736 | CLIC2       | NM_001266882 | NAP1L3      | NM_001265658 |
| MID1IP1   | NM_001257645 | BRS3      | NM_001032902 | MSN        | NM_001257696 | VAMP7       | NM_001261784 | PCDH19      | NM_001265688 |
| ATP6AP2   | NM_001257625 | CD40LG    | NM_001032839 | EDA2R      | NM_001193467 | PPAPDC1A    | NM_001266703 | DRP2        | NM_001266215 |
| CASK      | NM_001261010 | F9        | NM_001109683 | AR         | NM_001032911 | WDR11       | NM_001266829 | ARMCX3      | NM_001257722 |
| NDP       | NM_001266972 | SOX3      | NM_001193752 | OPHN1      | NM_001261353 | HTRA1       | NM_001258176 | ARMCX2      | NM_001194042 |
| FUNDC1    | NM_001266574 | LDOC1     | NM_001260647 | EFNB1      | NM_001261375 | C9H10orf120 | NM_001194246 | ARMCX5      | NM_001194914 |
| DUSP21    | NM_001265675 | SLITRK2   | NM_001261220 | OTUD6A     | NM_001193698 | ACADSB      | NM_001261772 | TMEM31      | NM_001194917 |
| ZNF673    | NM_001266019 | TMEM185A  | NM_001257432 | DLG3       | NM_001194912 | BUB3        | NM_001266253 | PLP1        | NM_001260539 |
| CHST7     | NM_001265790 | MTM1      | NM_001261718 | SNX12      | NM_001193757 | GPR26       | NM_001265705 | FAM199X     | NM_001193933 |
| RGN       | NM_001266311 | CD99L2    | NM_001261370 | NONO       | NM_001194913 | FAM53B      | NM_001193710 | PNPLA4      | NM_001193844 |
| TIMP1     | NM_001032939 | FATE1     | NM_001261152 | CXCR3      | NM_001145040 | FAM196A     | NM_001193840 | AMELX       | NM_001098513 |
| TBC1D25   | NM_001266296 | NSDHL     | NM_001265710 | CITED1     | NM_001266177 | MGMT        | NM_001257605 | TLR7        | NM_001130426 |
| PIM2      | NM_001265848 | DUSP9     | NM_001265730 | PHKA1      | NM_001261198 | C9H10orf93  | NM_001190957 | GEMIN8      | NM_001257640 |
| PLP2      | NM_001265866 | SLC6A8    | NM_001266276 | RLIM       | NM_001266839 | MTG1        | NM_001190917 | GLRA2       | NM_001266926 |
| FOXP3     | NM_001032918 | L1CAM     | NM_001261779 | CXHorf26   | NM_001194106 | PRKX        | NM_001258204 | ASB11       | NM_001194155 |
| MAGED4B   | NM_001266405 | MECP2     | NM_001257542 | FGF16      | NM_001194115 | NLGN4Y      | NM_001145058 | AP1S2       | NM_001194910 |
| RBBP7     | NM_001261191 | SCML2     | NM_001261359 | EIF1AX     | NM_001261777 | SAT1        | NM_001257662 | PRDX4       | NM_001193811 |
| SCML1     | NM_001114112 | RS1       | NM_001194911 | DRD1       | NM_001206975 | PDE8A       | NM_001266644 | MLH3        | NM_001257783 |
| SPATA4    | NM_001035527 | LIX1      | NM_001194032 | SFXN1      | NM_001260606 | SEC11A      | NM_001261576 | NEK9        | NM_001265631 |
| SPCS3     | NM_001194879 | RIOK2     | NM_001260597 | HRH2       | NM_001198697 | KLHL25      | NM_001258115 | FOS         | NM_001098399 |
| ODZ3      | NM_001193929 | RGMB      | NM_001265620 | TSPAN17    | NM_001261528 | NTRK3       | NM_001265637 | C7H14orf1   | NM_001194135 |
| DCTD      | NM_001260610 | FAM174A   | NM_001194071 | FAM193B    | NM_001194019 | ABHD2       | NM_001261263 | TGFB3       | NM_001257475 |
| CLDN24    | NM_001194880 | ST8SIA4   | NM_001266232 | AGXT2L2    | NM_001260930 | GDPGP1      | NM_001194046 | VASH1       | NM_001261805 |
| STOX2     | NM_001266165 | GIN1      | NM_001194084 |            |              |             |              |             |              |

Supplemental Table 1: (ii<sub>a</sub>) H3K4me3-enriched genes in the Baboon SVZ NB population

| Gene Name    | RefSeq ID    | Gene Name  | RefSeq ID    | Gene Name   | RefSeq ID    | Gene Name    | RefSeq ID    | Gene Name    | RefSeq ID    |
|--------------|--------------|------------|--------------|-------------|--------------|--------------|--------------|--------------|--------------|
| HMX1         | NM_001172429 | PIANP      | NM_001194405 | HNM7        | NM_001195823 | WSB1         | NM_001261284 | ARL6IP5      | NM_001257759 |
| PCGF3        | NM_001258171 | SLC2A3     | NM_001261533 | INSIG2      | NM_001194781 | KIAA0100     | NM_001194408 | SUCLG2       | NM_001261121 |
| VWA1         | NM_001260638 | TAS2R13    | NM_001080767 | TSN         | NM_001266679 | GOSR1        | NM_001257945 | RPP14        | NM_001266712 |
| SSU72        | NM_001261547 | TAS2R46    | NM_001080757 | MZT2B       | NM_001193944 | CCL4L1       | NM_001032873 | TEX264       | NM_001261993 |
| TPRG1L       | NM_001260515 | FAR2       | NM_001265709 | IMP4        | NM_001266231 | CCL11        | NM_001032874 | SNRK         | NM_001257661 |
| PHF13        | NM_001260753 | METTL20    | NM_001193718 | CFC1        | NM_001190851 | MRPL10       | NM_001260951 | LYZL4        | NM_001194683 |
| DFFA         | NM_001260683 | CNTN1      | NM_001261751 | CARS        | NM_001266326 | VMP1         | NM_001190897 | RPSA         | NM_001195480 |
| EFHD2        | NM_001265711 | TMEM117    | NM_001261543 | CFL1        | NM_001266605 | HNF1B        | NM_001194548 | CSRNP1       | NM_001258149 |
| SH2D5        | NM_001266317 | SLC38A1    | NM_001266098 | EHD1        | NM_001261195 | KRTAP4-1     | NM_001193889 | DCUN1D1      | NM_001257454 |
| TRIM63       | NM_001260704 | SLC38A2    | NM_001257811 | MACROD1     | NM_001194685 | TMEM106A     | NM_001194813 | DNAJC19      | NM_001266267 |
| SMAP2        | NM_001266730 | PRKAG1     | NM_001266032 | C14H11orf84 | NM_001194689 | CYTH1        | NM_001261797 | NDUFB5       | NM_001266533 |
| FOXJ3        | NM_001266996 | TMBIM6     | NM_001195449 | SDHAF2      | NM_001193692 | PYCR1        | NM_001265983 | SEC62        | NM_001195502 |
| BEND5        | NM_001266827 | TFCP2      | NM_001266217 | OR5AN1      | NM_001193824 | MRP63        | NM_001193743 | PDCD10       | NM_001266410 |
| JUN          | NM_001265850 | SLC4A8     | NM_001258188 | OR10Q1      | NM_001193880 | PSPC1        | NM_001257902 | SPTSSB       | NM_001193354 |
| NEGR1        | NM_001261637 | EIF4B      | NM_001195808 | TIMM10      | NM_001261523 | PROXONB      | NM_001194734 | SCHIP1       | NM_001265718 |
| PRKACB       | NM_001260959 | MAP3K12    | NM_001260812 | OR4B1       | NM_001194287 | SLC7A1       | NM_001266615 | GMPS         | NM_001261203 |
| ZNHIT6       | NM_001266313 | OR6C4      | NM_001194490 | NDUFS3      | NM_001194303 | STARD13      | NM_001261243 | TM4SF18      | NM_001261318 |
| LMO4         | NM_001257841 | WIBG       | NM_001257874 | SLC35C1     | NM_001258150 | HTR2A        | NM_001032966 | GK5          | NM_001261112 |
| ZCRB1        | NM_001195521 | STAC3      | NM_001194695 | TSPAN18     | NM_001266877 | OR5L1        | NM_001194579 | ACPL2        | NM_001171842 |
| TMED5        | NM_001266841 | TBK1       | NM_001261193 | ACCS        | NM_001260528 | PCDH17       | NM_001265711 | FAIM         | NM_001266110 |
| CNN3         | NM_001261809 | MDM2       | NM_001266402 | API5        | NM_001257933 | PCDH9        | NM_001258186 | SOX14        | NM_001194657 |
| CCDC76       | NM_001266714 | TPH2       | NM_001039946 | TRIM44      | NM_001260523 | FBXL3        | NM_001261635 | IL2ORB       | NM_001194658 |
| PTPN22       | NM_001261076 | PPFIA2     | NM_001266465 | ANO3        | NM_001265904 | SOX21        | NM_001193732 | SATB1        | NM_001265648 |
| NOTCH2       | NM_001260662 | DDT        | NM_001257668 | SVIP        | NM_001261697 | DNAJC3       | NM_001266404 | RAB5A        | NM_001261148 |
| SEC22B       | NM_001261329 | TMCC1      | NM_001261150 | BTBD10      | NM_001265857 | STK24        | NM_001266859 | UBE2E2       | NM_001193865 |
| GPR89B       | NM_001257436 | TMPO       | NM_001261527 | SWAP70      | NM_001172414 | UBAC2        | NM_001171176 | TGFBF2       | NM_001261151 |
| TXNIP        | NM_001257935 | SLC25A3    | NM_001257587 | RIC3        | NM_001261177 | TEX30        | NM_001266631 | CMTM7        | NM_001260694 |
| BOLA1        | NM_001257561 | SCYL2      | NM_001266890 | OR10A6      | NM_001194102 | ARGLU1       | NM_001194022 | UBP1         | NM_001266788 |
| SF3B4        | NM_001261232 | SART3      | NM_001257555 | OR2D3       | NM_001194381 | PSMG2        | NM_001193620 | EIF4A2       | NM_001195661 |
| ILF2         | NM_001266173 | GIT2       | NM_001266994 | OR52W1      | NM_001194213 | NDC80        | NM_001265902 | DECR2        | NM_001204462 |
| HAX1         | NM_001266445 | MAPKAPK5   | NM_001257850 | TRIM22      | NM_001113359 | SNRPD1       | NM_001260829 | FAHD1        | NM_001260690 |
| THBS3        | NM_001260514 | RFC5       | NM_001261662 | FOLR1       | NM_001194647 | IMPACT       | NM_001266605 | ZNF200       | NM_001261221 |
| RIT1         | NM_001261801 | HSPB8      | NM_001032937 | FCHSD2      | NM_001265957 | CHST9        | NM_001261472 | FAM86A       | NM_001194839 |
| LMNA         | NM_001257893 | RPLP0      | NM_001195428 | RAB6A       | NM_001261303 | TTR          | NM_001261679 | TMEM114      | NM_001194176 |
| FCGR2A       | NM_001257300 | FAM101A    | NM_001194211 | PAAF1       | NM_001265839 | B4GALT6      | NM_001257591 | EMP2         | NM_001265948 |
| FCGR2B       | NM_001257302 | PXMP2      | NM_001261587 | ACER3       | NM_001266753 | RIT2         | NM_001257707 | ZC3H7A       | NM_001257840 |
| UAP1         | NM_001266909 | SPOPL      | NM_001266382 | NDUFC2      | NM_001266174 | ST8SIA5      | NM_001083950 | BFAR         | NM_001260924 |
| RNF187       | NM_001164330 | ARL6IP6    | NM_001260607 | FAM181B     | NM_001194034 | CXXC1        | NM_001266605 | CDR2         | NM_001260929 |
| C1H1orf35    | NM_001265942 | GCA        | NM_001266140 | CCDC90B     | NM_001260811 | RNF152       | NM_001193834 | LCMT1        | NM_001260979 |
| ARF1         | NM_001193287 | CSRNP3     | NM_001257746 | TMEM126B    | NM_001267027 | CDH7         | NM_001193994 | TUFM         | NM_001266084 |
| TLR5         | NM_001130429 | GORASP2    | NM_001261707 | CTSC        | NM_001195651 | CNDP2        | NM_001257758 | C20H1orf54   | NM_001194257 |
| MOSC2        | NM_001257477 | COL3A1     | NM_001266039 | CHORDC1     | NM_001257756 | PQLC1        | NM_001265722 | C20H1orf58   | NM_001194596 |
| LYPLAL1      | NM_001266865 | NAB1       | NM_001257641 | C14H11orf75 | NM_001193371 | TXNL4A       | NM_001260866 | ARL2BP       | NM_001267028 |
| LOC100499547 | NM_001195508 | SDPR       | NM_001265645 | DCUN1D5     | NM_001260996 | GN7G         | NM_001193395 | GINS3        | NM_001260655 |
| CSR1P        | NM_001257285 | SLC39A10   | NM_001260918 | AMICA1      | NM_001261678 | VMAC         | NM_001193782 | CBFB         | NM_001266558 |
| NEK7         | NM_001258200 | MOBK13     | NM_001257738 | SC5DL       | NM_001257517 | DHPS         | NM_001266677 | CYB5B        | NM_001194167 |
| RG2          | NM_001265925 | BMPR2      | NM_001260859 | HSPA8       | NM_001261657 | IER2         | NM_001266014 | PSMD7        | NM_001257814 |
| C1H1orf27    | NM_001260697 | EEF1B2     | NM_001266385 | VPS26B      | NM_001257745 | CYP4F22      | NM_001194539 | DHX38        | NM_001257881 |
| TRMT1L       | NM_001260768 | GPR1       | NM_001047129 | C15H9orf172 | NM_001193965 | CYP4F12      | NM_001194560 | ST3GAL2      | NM_001266341 |
| RG5          | NM_001260517 | LANCL1     | NM_001258121 | LCN9        | NM_001171841 | OCEL1        | NM_001194959 | ADAT1        | NM_001194845 |
| ASTN1        | NM_001266732 | CNPPD1     | NM_001194773 | SURF6       | NM_001194177 | LPAR2        | NM_001266718 | KARS         | NM_001257593 |
| PGBD2        | NM_001258110 | SCG2       | NM_001194420 | UCK1        | NM_001194319 | PLEKHF1      | NM_001193737 | NUDT7        | NM_001194315 |
| COX20        | NM_001257785 | KIAA1486   | NM_001194144 | C15H9orf78  | NM_001267022 | LRP3         | NM_001260541 | SDR42E1      | NM_001194527 |
| AKT3         | NM_001266640 | PSMD1      | NM_001257805 | OR1Q1       | NM_001193814 | LSM14A       | NM_001257954 | MPHOSPH6     | NM_001193603 |
| GREM2        | NM_001266108 | NPPC       | NM_001194397 | DBC1        | NM_001260978 | SCN1B        | NM_001258167 | FOXC2        | NM_001198708 |
| CHRM3        | NM_001257740 | MYT1L      | NM_001265731 | SLC31A1     | NM_001257506 | COX7AH       | NM_001040278 | DPEP1        | NM_001260742 |
| TBCE         | NM_001265678 | ROCK2      | NM_001260913 | LPAR1       | NM_001260860 | ZNF790       | NM_001261671 | IFNAR1       | NM_001266513 |
| RHOJ         | NM_001265717 | RHOB       | NM_001194776 | TXN         | NM_001042732 | ZNF345       | NM_001194827 | ATP5J        | NM_001257938 |
| SPATA2       | NM_001260963 | PREB       | NM_001266941 | FAM206A     | NM_001260843 | SPINT2       | NM_001194343 | C3H21orf91   | NM_001194344 |
| ELMO2        | NM_001266903 | SUPT7L     | NM_001260750 | OR13C8      | NM_001194361 | ACTN4        | NM_001261802 | HSPA13       | NM_001193708 |
| VSTM2L       | NM_001260601 | PPP1CB     | NM_001260652 | TMOD1       | NM_001265684 | HNRNPL       | NM_001266000 | ABCC13       | NM_001032930 |
| RBM12        | NM_001032840 | YIPF4      | NM_001257440 | TRMT10B     | NM_001257537 | NFKB1B       | NM_001258157 | FAM20C       | NM_001193713 |
| SNTA1        | NM_001266239 | RASGRP3    | NM_001261700 | MTAP        | NM_001261737 | AKT2         | NM_001265989 | PAPOLB       | NM_001194858 |
| TM9SF4       | NM_001260631 | SLC8A1     | NM_001032861 | SNAPC3      | NM_001260804 | RABAC1       | NM_001260923 | ACTB         | NM_001033084 |
| NSFL1C       | NM_001266663 | KCNKG3     | NM_001261485 | RANBP6      | NM_001194574 | PRR19        | NM_001194317 | KDEL2        | NM_001260765 |
| TRMT6        | NM_001261660 | RTN4       | NM_001205127 | CDC37L1     | NM_001257827 | IRGQ         | NM_001265865 | BR13         | NM_001266634 |
| PLCB1        | NM_001257867 | PEX13      | NM_001258170 | KLF9        | NM_001265918 | C19orf61     | NM_001194356 | PDAP1        | NM_001266283 |
| FLRT3        | NM_001265872 | XPO1       | NM_001266844 | NTRK2       | NM_001261297 | PVR          | NM_001043386 | ACHE         | NM_001128088 |
| DSTN         | NM_001195492 | AFTPH      | NM_001257727 | NAA35       | NM_001194389 | FOXA3        | NM_001194519 | RABL5        | NM_001194410 |
| TMEM90B      | NM_001194092 | SERTAD2    | NM_001261684 | RPL12       | NM_001193560 | NAPA         | NM_001194588 | TMEM248      | NM_001193777 |
| NANP         | NM_001266157 | WDR92      | NM_001261137 | ANGPTL2     | NM_001109811 | BAX          | NM_001261016 | TPST1        | NM_001257855 |
| CECR5        | NM_001194230 | TIA1       | NM_001261758 | HSPA5       | NM_001266596 | LIN7B        | NM_001194649 | VKORC1L1     | NM_001266931 |
| TOP3B        | NM_001266407 | FAM136A    | NM_001267012 | OGN         | NM_001261240 | PPP2R1A      | NM_001257922 | CHCHD2       | NM_001198739 |
| ZNF280B      | NM_001261022 | SPR        | NM_001260549 | HSD17B3     | NM_001266504 | KIR3DL12     | NM_001105171 | MRPS17       | NM_001266196 |
| SNRPD3       | NM_001194052 | STAMBP     | NM_001260604 | GLOD4       | NM_001265952 | LOC100125569 | NM_001105176 | GRB10        | NM_001257428 |
| CRYBB2       | NM_001122894 | POLE4      | NM_001261810 | TLCD2       | NM_001194730 | FCAR         | NM_001039950 | CD7C         | NM_001266610 |
| RASL10A      | NM_001260903 | REG1B      | NM_001194568 | KIF1C       | NM_001266243 | ZNF805       | NM_001194103 | NUDCD3       | NM_001266593 |
| RBFOX2       | NM_001261516 | LRRTM1     | NM_001257467 | PLSCR3      | NM_001265888 | GBE1         | NM_001266287 | PSMA2        | NM_001266881 |
| EIF3D        | NM_001257511 | RETSAT     | NM_001257563 | C16H17orf59 | NM_001194556 | C2H3orf38    | NM_001190960 | C7orf36      | NM_001194130 |
| POLR2F       | NM_001265974 | ST3GAL5    | NM_001257500 | STX8        | NM_001265754 | TOMM70A      | NM_001266153 | STARD3NL     | NM_001266168 |
| GRAP2        | NM_001261710 | RNF103     | NM_001266577 | TVP23B      | NM_001260706 | NAA50        | NM_001261371 | GGCT         | NM_001266969 |
| TSPO         | NM_001258111 | KCNIP3     | NM_001257864 | ZNF287      | NM_001266709 | GTF2E1       | NM_001260889 | TAX1BP1      | NM_001266932 |
| RABL2B       | NM_001260670 | INPP4A     | NM_001261619 | TOM1L2      | NM_001260762 | SETD5        | NM_001265978 | NUPL2        | NM_001266179 |
| C11H12orf4   | NM_001194147 | LYG1       | NM_001194261 | B9D1        | NM_001266722 | CAV3         | NM_001194078 | SP4          | NM_001266828 |
| VWF          | NM_001243086 | C13H2orf40 | NM_001194457 | MAP2K3      | NM_001265947 | CRBN         | NM_001195647 | BET1         | NM_001260728 |
| KLHL28       | NM_001261270 | ESR2       | NM_001265821 | GSKIP       | NM_001194191 | FDFT1        | NM_001260724 | GINS4        | NM_001261222 |
| RPL10L       | NM_001194068 | GPHN       | NM_001257815 | TRMT61A     | NM_001257540 | TNKS         | NM_001261281 | THAP1        | NM_001257879 |
| RPS29        | NM_001267537 | DCAF4      | NM_001258114 | CRIP1       | NM_001266846 | TUSC3        | NM_001266279 | MCM4         | NM_001266203 |
| NGG2         | NM_001190910 | ELMSAN1    | NM_001257926 | ZNF596      | NM_001266814 | NAT2         | NM_001044736 | SNAI2        | NM_001260982 |
| EROL1        | NM_001266764 | POMT2      | NM_001260626 | C8H8orf42   | NM_001265984 | FGF17        | NM_001194186 | LOC100499551 | NM_001195073 |
| FERM2        | NM_001266319 | GTF2A1     | NM_001257710 | AGPAT5      | NM_001257833 | NEFL         | NM_001265845 | TCEA1        | NM_001260708 |
| JKAMP        | NM_001260993 | TDP1       | NM_001257779 | SPAG11B     | NM_001037282 | FZD3         | NM_001261141 | C8H8orf46    | NM_001194901 |

Supplemental Table 1: (ii<sub>b</sub>) H3K4me3-enriched genes in the Baboon SVZ NB population

| Gene Name  | RefSeq ID    | Gene Name    | RefSeq ID    | Gene Name    | RefSeq ID    | Gene Name    | RefSeq ID    | Gene Name  | RefSeq ID    |
|------------|--------------|--------------|--------------|--------------|--------------|--------------|--------------|------------|--------------|
| SRI        | NM_001266216 | PPID         | NM_001265834 | STMN2        | NM_001265775 | TRMT5        | NM_001261618 | CPSF2      | NM_001257580 |
| KIAA1324L  | NM_001194030 | C5H4orf43    | NM_001266649 | MRPS28       | NM_001261089 | RHOJ         | NM_001260613 | GOLGA5     | NM_001257502 |
| SEMA3C     | NM_001260533 | CBR4         | NM_001193693 | FABP5        | NM_001260789 | ROAD2        | NM_001131060 | LEPROTL1   | NM_001266983 |
| PHTF2      | NM_001258132 | FBXO8        | NM_001265874 | RALYL        | NM_001201567 | CTSB         | NM_001194899 | ERLIN2     | NM_001257541 |
| FGL2       | NM_001260674 | FRG1         | NM_001261228 | CA2          | NM_001195417 | ARFGEF1      | NM_001261046 | SEC23A     | NM_001261363 |
| RINT1      | NM_001257819 | EXOC3        | NM_001260656 | DCAF4L2      | NM_001198702 | PI15         | NM_001193804 | GRIA2      | NM_001185014 |
| IMMP2L     | NM_001261314 | CCDC127      | NM_001194083 | NBN          | NM_001265739 | GUCY1B3      | NM_001266845 | HECTD1     | NM_001261259 |
| TAS2R16    | NM_001080759 | DAP          | NM_001257566 | LRRC69       | NM_001193750 | TRAM1L1      | NM_001261483 | SV2B       | NM_001260629 |
| CALU       | NM_001260801 | FAM134B      | NM_001261775 | FAM92A1      | NM_001265930 | ANKRD50      | NM_001266441 | SLCO3A1    | NM_001261477 |
| BPGM       | NM_001266072 | LOC100499546 | NM_001195043 | MTDH         | NM_001266369 | SLC25A31     | NM_001194300 | MEF2A      | NM_001260914 |
| MTPN       | NM_001260744 | DROSHA       | NM_001261157 | OSR2         | NM_001267000 | MGST2        | NM_001261313 | ORAQ3      | NM_001194892 |
| MRPS33     | NM_001266016 | BRX1         | NM_001261247 | LRP12        | NM_001261683 | ZNF330       | NM_001266710 | TMEM55B    | NM_001194893 |
| C3H7orf33  | NM_001194007 | LMBRD2       | NM_001266468 | SYBU         | NM_001265668 | TMEM184C     | NM_001260921 | WDR12      | NM_001260900 |
| EZH2       | NM_001266503 | PTGER4       | NM_001266046 | UTP23        | NM_001193908 | ARFIP1       | NM_001266175 | SCFD1      | NM_001266523 |
| NCAPG2     | NM_001258148 | PLCXD3       | NM_001260577 | MED30        | NM_001266097 | THOC2        | NM_001260621 | SILTRK2    | NM_001261220 |
| TMEM170B   | NM_001261045 | SEPP1        | NM_001159490 | MRPL13       | NM_001258083 | FAM127A      | NM_001194127 | CETN2      | NM_001195814 |
| RNF144B    | NM_001265699 | FGF10        | NM_001193950 | TRIB1        | NM_001193695 | ARHGEF6      | NM_001266573 | CLIC2      | NM_001266882 |
| ID4        | NM_001265656 | SNX18        | NM_001261750 | FAM49B       | NM_001261694 | LDOC1        | NM_001260647 | LDHAL6B    | NM_001194113 |
| NRSN1      | NM_001257709 | IL6ST        | NM_001265991 | ST3GAL1      | NM_001261634 | HNRNPD       | NM_001261634 | PTPLAD1    | NM_001266546 |
| GMNN       | NM_001258199 | ELOVL7       | NM_001194255 | GPIHBP1      | NM_001266526 | STBD1        | NM_001194876 | PIAS1      | NM_001266301 |
| HIST1H2BH  | NM_001193825 | HTR1A        | NM_001198700 | TSTA3        | NM_001261649 | SUMO2        | NM_001198691 | HEXA       | NM_001261529 |
| TRIM27     | NM_001260792 | ENC1         | NM_001260583 | CPSF1        | NM_001267793 | LPHN3        | NM_001261704 | PML        | NM_001042434 |
| MAMU-A3    | NM_001171838 | AGGF1        | NM_001261037 | ZMYND11      | NM_001261702 | LOC100499503 | NM_001194967 | SCAMP5     | NM_001260562 |
| GNL1       | NM_001047139 | LHFPL2       | NM_001194391 | LARP4B       | NM_001260689 | TMEM165      | NM_001266322 | SIN3A      | NM_001266100 |
| C4H6orf136 | NM_001105163 | HOMER1       | NM_001261570 | WDR37        | NM_001260851 | CHIC2        | NM_001257545 | IMP3       | NM_001261712 |
| TUBB       | NM_001032813 | RPS23        | NM_001193580 | AKR1E2       | NM_001194235 | USP46        | NM_001266963 | SNX33      | NM_001257452 |
| FLOT1      | NM_001105168 | CCNH         | NM_001266446 | CDC123       | NM_001266654 | MAPK10       | NM_001260857 | STAR5      | NM_001260916 |
| MAMU-I     | NM_001079671 | MEF2C        | NM_001266447 | DCLRE1C      | NM_001204350 | TSPAN5       | NM_001194290 | C7H15orf40 | NM_001261261 |
| MAMU-B     | NM_001048245 | ARRDC3       | NM_001260940 | PTPLA        | NM_001193912 | DDIT4L       | NM_001194403 | PDE8A      | NM_001266644 |
| MICB       | NM_001114956 | FAM172A      | NM_001193887 | CACNB2       | NM_001257782 | PPP3CA       | NM_001261563 | MRPS11     | NM_001261578 |
| MAMU-DRB1  | NM_001044261 | RIOK2        | NM_001260597 | THNSL1       | NM_001266425 | INTS12       | NM_001260673 | NRGN       | NM_001266787 |
| MAMU-DMB   | NM_001265654 | ST8SIA4      | NM_001266232 | ARHGAP12     | NM_001260799 | ELOVL6       | NM_001266921 | MRFAP1     | NM_001193938 |
| TAF11      | NM_001261556 | DCP2         | NM_001266464 | LOC100499557 | NM_001195085 | MAGED2       | NM_001257614 | LYAR       | NM_001258141 |
| KCTD20     | NM_001257899 | TSSK1B       | NM_001193468 | CSGALNACT2   | NM_001172170 | SPIN3        | NM_001260981 | RAB28      | NM_001265724 |
| TREML1     | NM_001194729 | TRIM36       | NM_001266479 | ZNF22        | NM_001261786 | ZC4H2        | NM_001261736 | BTBD19     | NM_001260783 |
| CCND3      | NM_001265987 | DTWD2        | NM_001261379 | OGDHL        | NM_001265802 | MSN          | NM_001257696 | TBC1D1     | NM_001258065 |
| RPL7L1     | NM_001193633 | CSNK1G3      | NM_001258050 | SNCG         | NM_001266560 | EDA2R        | NM_001193467 | RHOH       | NM_001260809 |
| CD2AP      | NM_001266309 | GRAMD3       | NM_001265990 | FAM190B      | NM_001193762 | CXHXorf26    | NM_001194106 | GNPDA2     | NM_001194875 |
| IL17F      | NM_001261287 | FGFR1OP2     | NM_001257773 | MRPS16       | NM_001257904 | TGIF2LX      | NM_001032888 | OClAD2     | NM_001266991 |
| TMEM30A    | NM_001260817 | SAR1B        | NM_001261028 | ECD          | NM_001261188 | NAP1L3       | NM_001265658 | MRPS18C    | NM_001266126 |
| MYO6       | NM_001104536 | CAMLG        | NM_001202851 | DDX50        | NM_001258182 | DRP2         | NM_001266215 | EMC4       | NM_001260989 |
| MRAP2      | NM_001261086 | FAM13B       | NM_001260948 | CCAR1        | NM_001260782 | H2BFWT       | NM_001193918 | ATPBD4     | NM_001266595 |
| POLR1D     | NM_001257459 | LRRTM2       | NM_001266604 | LRRTM3       | NM_001266575 | PLS3         | NM_001266221 | SPRED1     | NM_001204360 |
| SLC35A1    | NM_001266759 | NDFIP1       | NM_001194017 | REEP3        | NM_001261663 | LOC100499562 | NM_001195093 | VPS18      | NM_001257653 |
| GJA10      | NM_001193951 | FGF1         | NM_001266029 | MBL2         | NM_001105535 | ZBTB33       | NM_001266950 | CHP1       | NM_001266371 |
| C4H6orf203 | NM_001266984 | CSNK1A1      | NM_001261235 | PAPSS2       | NM_001266008 | C1GALT1C1    | NM_001260840 | PDIA3      | NM_001195716 |
| ZDHHC14    | NM_001266260 | DCTN4        | NM_001260767 | CH25H        | NM_001198699 | AMELX        | NM_001098513 | CTDSPL2    | NM_001266809 |
| OPRM1      | NM_001032824 | CCDC69       | NM_001260862 | FRA10AC1     | NM_001266720 | TMSB4X       | NM_001260557 | RSL24D1    | NM_001258062 |
| GINM1      | NM_001193728 | C6H5orf4     | NM_001257519 | POLL         | NM_001266906 | MAGEB1       | NM_001260599 | RAB27A     | NM_001193855 |
| UST        | NM_001257513 | MRPL22       | NM_001194584 | NT5C2        | NM_001257875 | GPR34        | NM_001266567 | CCR6       | NM_001032935 |
| FBXO30     | NM_001261073 | THG1L        | NM_001194604 | GSTO1        | NM_001260555 | DUSP21       | NM_001265675 | PSMB1      | NM_001260636 |
| PEX3       | NM_001257927 | GABRG2       | NM_001261778 | CACUL1       | NM_001266943 | SERPINB6     | NM_001202551 | GPR78      | NM_001193900 |
| MED23      | NM_001261479 | MAT2B        | NM_001257473 | HTRA1        | NM_001258176 | MAGED4B      | NM_001266405 | SNRPN      | NM_001261205 |
| CENPW      | NM_001193377 | RARS         | NM_001261218 | BCCIP        | NM_001265671 | XAGE5        | NM_001193739 | GABRB3     | NM_001260702 |
| PLN        | NM_001190894 | ATP6V0E1     | NM_001261126 | NKX6-2       | NM_001266630 | HUWE1        | NM_001266752 | NDNL2      | NM_001257507 |
| HS3ST5     | NM_001193687 | DRD1         | NM_001206975 | CYP2E1       | NM_001040213 | MAMU-B18     | NM_001114964 | PACRG      | NM_001266357 |
| SNX3       | NM_001257953 | ARL10        | NM_001266393 | APOBEC3A     | NM_001246231 | COX7A2L      | NM_001266821 | NDN        | NM_001172102 |
| PLG        | NM_001043075 | B4GALT7      | NM_001260676 | MAMU-AG      | NM_001134230 | NLGN4Y       | NM_001145058 | MRPL41     | NM_001258134 |



Supplemental Table 1: (iii<sub>a</sub>) H3K4me3-enriched genes in the Baboon SVZ Total progenitors

| Gene Name | RefSeq ID    | Gene Name  | RefSeq ID    | Gene Name    | RefSeq ID    | Gene Name    | RefSeq ID    | Gene Name   | RefSeq ID    |
|-----------|--------------|------------|--------------|--------------|--------------|--------------|--------------|-------------|--------------|
| HMX1      | NM_001172429 | ZNRANB2    | NM_001257636 | NCSTN        | NM_001260780 | GNPAT        | NM_001265780 | NOL12       | NM_001193831 |
| ADD1      | NM_001261471 | NEGR1      | NM_001261637 | PFDN2        | NM_001260521 | GALNT2       | NM_001261355 | RPL3        | NM_001193554 |
| MAEA      | NM_001258174 | FPGT       | NM_001204799 | DEDD         | NM_001257441 | RHOU         | NM_001265717 | SMCR7L      | NM_001194095 |
| PCGF3     | NM_001258171 | TYW3       | NM_001257439 | B4GALT3      | NM_001257845 | C10H20orf195 | NM_001193505 | ATF4        | NM_001266632 |
| ISG15     | NM_001266806 | RABGGTB    | NM_001261560 | SDHC         | NM_001193587 | ATP5E        | NM_001032901 | GRAP2       | NM_001261710 |
| VWA1      | NM_001260638 | ST6GALNAC3 | NM_001261629 | FCGR2A       | NM_001257300 | STX16        | NM_001257651 | ST13        | NM_001261322 |
| SSU72     | NM_001261547 | PIGK       | NM_001260944 | FCGR2B       | NM_001257302 | RTFDC1       | NM_001193871 | EP300       | NM_001266486 |
| RER1      | NM_001257522 | AK5        | NM_001266348 | UHMK1        | NM_001266768 | ZFP64        | NM_001257633 | TEF         | NM_001266252 |
| TPRG1L    | NM_001260515 | PTGFR      | NM_001266439 | UAP1         | NM_001266909 | ADNP         | NM_001266818 | CENPM       | NM_001194334 |
| RPL22     | NM_001193564 | PRKACB     | NM_001260959 | RNF187       | NM_001164330 | SPATA2       | NM_001260963 | C10H22orf32 | NM_001194351 |
| PHF13     | NM_001260757 | RPF1       | NM_001261571 | TRIM11       | NM_001261480 | KCNB1        | NM_001265653 | RRP7A       | NM_001194373 |
| VAMP3     | NM_001261368 | C1H1orf52  | NM_001258201 | C1H1orf35    | NM_001265942 | STAU1        | NM_001266308 | POLDIP3     | NM_001190901 |
| ERRF1     | NM_001261681 | ZNHIT6     | NM_001266313 | ARF1         | NM_001193287 | CSE1L        | NM_001257815 | TSP0        | NM_001258111 |
| REER      | NM_001265662 | CLCA1      | NM_001032912 | ADCK3        | NM_001258190 | ELMO2        | NM_001266903 | CERK        | NM_001266852 |
| ENO1      | NM_001195611 | SH3GLB1    | NM_001266360 | PSEN2        | NM_001261617 | WFDC13       | NM_001193446 | ZBED4       | NM_001261128 |
| CTNNBIP1  | NM_001260588 | SEP15      | NM_001159416 | PYCR2        | NM_001261780 | TP53TG5      | NM_001194416 | RABL2B      | NM_001260670 |
| DFFA      | NM_001260683 | LMO4       | NM_001257841 | EPHX1        | NM_001258087 | C10H20orf111 | NM_001172172 | SLC6A12     | NM_001266900 |
| SRM       | NM_001257807 | ZCRB1      | NM_001195521 | LBR          | NM_001261333 | IFT52        | NM_001261644 | FBXL14      | NM_001260522 |
| DHRS3     | NM_001260537 | LRRRC8D    | NM_001266553 | CNIH4        | NM_001260666 | EMILIN3      | NM_001193776 | LRTM2       | NM_001261503 |
| EFHD2     | NM_001265791 | CDC7       | NM_001266610 | TIMM8B       | NM_001267792 | ZHX3         | NM_001265777 | FKBP4       | NM_001261339 |
| ZBTB17    | NM_001257470 | FAM69A     | NM_001266885 | TLR5         | NM_001130429 | ADIG         | NM_001193372 | TULP3       | NM_001266799 |
| FBXO42    | NM_001266406 | TMED5      | NM_001266841 | DUSP10       | NM_001257695 | RPRD1B       | NM_001261686 | C11H12orf4  | NM_001194147 |
| NECAP2    | NM_001258172 | DR1        | NM_001257839 | MOSC2        | NM_001257477 | VSTM2L       | NM_001260601 | VWF         | NM_001243086 |
| EMC1      | NM_001261118 | CNN3       | NM_001261809 | LYPLAL1      | NM_001266865 | CTNBNL1      | NM_001261665 | MRPL51      | NM_001194316 |
| AKR7A2    | NM_001265698 | TMEM56     | NM_001260969 | TGFB2        | NM_001266518 | BLCAP        | NM_001190863 | GAPDH       | NM_001195426 |
| SH2D5     | NM_001266317 | CCDC76     | NM_001266714 | KCTD3        | NM_001261234 | C10H20orf132 | NM_001193970 | PIANP       | NM_001194405 |
| CELA3B    | NM_001195397 | EXTL2      | NM_001267005 | ATF3         | NM_001266010 | DLGAP4       | NM_001266455 | MLF2        | NM_001266330 |
| PITHD1    | NM_001260794 | SLC30A7    | NM_001266184 | DTL          | NM_001260630 | SCAND1       | NM_001190908 | PHB2        | NM_001266316 |
| SRSF10    | NM_001195584 | DPH5       | NM_001257957 | NEK2         | NM_001258137 | ROMO1        | NM_001190916 | EMG1        | NM_001266361 |
| CLIC4     | NM_001261607 | OLFM3      | NM_001266811 | HSD11B1      | NM_001195425 | RBM12        | NM_001032840 | SLC2A3      | NM_001261533 |
| TMEM50A   | NM_001261245 | AMY2B      | NM_001266186 | CD46         | NM_001195746 | FAM83C       | NM_001194151 | PHC1        | NM_001260906 |
| TMEM57    | NM_001038650 | PRMT6      | NM_001257521 | LOC100499547 | NM_001195058 | EDEM2        | NM_001261036 | MAGOHB      | NM_001265616 |
| CEP85     | NM_001257628 | SLC25A24   | NM_001258085 | PKFB2        | NM_001265621 | EIF2S2       | NM_001266866 | STYK1       | NM_001257594 |
| SFN       | NM_001258131 | FAM102B    | NM_001261603 | SLC41A1      | NM_001261146 | SNTA1        | NM_001266239 | TAS2R13     | NM_001080767 |
| GPN2      | NM_001266887 | HENMT1     | NM_001257553 | NUCKS1       | NM_001266481 | MARE1        | NM_001266800 | TAS2R46     | NM_001080757 |
| FGR       | NM_001258057 | TMEM167B   | NM_001261468 | TMEM81       | NM_001258123 | TM9SF4       | NM_001260631 | LOH12CR1    | NM_001261647 |
| IFI6      | NM_001048170 | PSRC1      | NM_001266394 | REN          | NM_001032916 | PDRG1        | NM_001265982 | CREBL2      | NM_001261237 |
| STX12     | NM_001265898 | PSTMA5     | NM_001260609 | SNRPE        | NM_001266775 | BCL2L1       | NM_001260717 | CDKN1B      | NM_001261005 |
| PPP1R8    | NM_001266462 | GSTM2      | NM_001261651 | TMEM183A     | NM_001266281 | RBCK1        | NM_001266297 | SLCO1B3     | NM_001032941 |
| EYA3      | NM_001266060 | GSTM3      | NM_001261580 | SYT2         | NM_001265809 | CSNK2A1      | NM_001260877 | LDHB        | NM_001195809 |
| ATPIF1    | NM_001260663 | AHCYL1     | NM_001258058 | GPR37L1      | NM_001266071 | C20orf46     | NM_001194413 | CMAS        | NM_001257801 |
| SESN2     | NM_001261068 | SLC16A4    | NM_001265727 | CAMSAP1L1    | NM_001266713 | NSFL1C       | NM_001266663 | LYRM5       | NM_001257657 |
| YTHDF2    | NM_001265926 | LRIF1      | NM_001266807 | NEK7         | NM_001258200 | VPS16        | NM_001266190 | KRAS        | NM_001261512 |
| MECR      | NM_001261169 | WDR77      | NM_001195443 | ASPM         | NM_001104535 | GNRH2        | NM_001034202 | RASSF8      | NM_001266170 |
| SNRNP40   | NM_001195650 | ATP5F1     | NM_001260679 | CDC73        | NM_001260567 | FASTKD5      | NM_001190877 | FGFR1OP2    | NM_001257773 |
| PTP4A2    | NM_001266129 | RAP1A      | NM_001261638 | RGS2         | NM_001265925 | MAVS         | NM_001042666 | MED21       | NM_001258120 |
| KPNA6     | NM_001266992 | CTTNBP2NL  | NM_001257547 | FAM5C        | NM_001261478 | PCNA         | NM_001266900 | PPFIBP1     | NM_001265753 |
| S100BPB   | NM_001266754 | CAPZA1     | NM_001261214 | C1H1orf27    | NM_001260697 | C10H20orf196 | NM_001260687 | MFRS35      | NM_001194252 |
| SMIM12    | NM_001260616 | SLC16A1    | NM_001257704 | TRMT1L       | NM_001260768 | TMX4         | NM_001260550 | FAR2        | NM_001265709 |
| ZMYM4     | NM_001260875 | PTPN22     | NM_001261076 | EDEM3        | NM_001266794 | PLCB1        | NM_001257867 | IPO8        | NM_001257497 |
| PSMB2     | NM_001257425 | OLFM3      | NM_001261337 | RGL1         | NM_001266879 | C20orf103    | NM_001194698 | METTL20     | NM_001193718 |
| TRAPPC3   | NM_001266767 | SIKE1      | NM_001261494 | GLUL         | NM_001266013 | PAK7         | NM_001260987 | CNTN1       | NM_001261751 |
| MTF1      | NM_001257795 | ATP1A1     | NM_001266673 | STX6         | NM_001261300 | MKS2         | NM_001266509 | GXYL1       | NM_001193857 |
| FHL3      | NM_001266674 | CD2        | NM_001195473 | ACBD6        | NM_001261348 | FLRT3        | NM_001265872 | YAF2        | NM_001266167 |
| PPT1      | NM_001261332 | TRIM45     | NM_001266726 | TOR1AIP2     | NM_001261631 | SNRFB2       | NM_001260894 | ADAMTS20    | NM_001110539 |
| SMAP2     | NM_001266730 | NOTCH2     | NM_001260662 | RGS5         | NM_001260517 | PET117       | NM_001266528 | IRAK4       | NM_001136101 |
| RIMS3     | NM_001261567 | SEC22B     | NM_001261329 | XRFG         | NM_001257610 | POLR3F       | NM_001260665 | TMEM117     | NM_001261543 |
| FOXJ3     | NM_001266996 | GPR89B     | NM_001257436 | MGST3        | NM_001266781 | DTD1         | NM_001266658 | NELL2       | NM_001261759 |
| PPIH      | NM_001260637 | RNF115     | NM_001266784 | UCK2         | NM_001265960 | THBD         | NM_001266049 | SLC38A1     | NM_001266098 |
| LEPRE1    | NM_001258160 | GNRHR2     | NM_001032842 | MAEL         | NM_001260961 | NXT1         | NM_001194163 | SLC38A2     | NM_001257811 |
| C1H1orf50 | NM_001266364 | TXNIP      | NM_001257935 | CD247        | NM_001077423 | CST3         | NM_001032924 | FAM113B     | NM_001194048 |
| CDC20     | NM_001261117 | FCGR1      | NM_001257304 | SFT2D2       | NM_001265679 | TMEM90B      | NM_001194092 | ASB8        | NM_001261721 |
| ELOVL1    | NM_001261559 | BOLA1      | NM_001257561 | XCL1         | NM_001032947 | APMAP        | NM_001266050 | C11H12orf68 | NM_001194183 |
| ATP6V0B   | NM_001257721 | SFB3A      | NM_001261232 | ATP1B1       | NM_001195530 | NANP         | NM_001266157 | CACNB3      | NM_001266978 |
| LOC702919 | NM_001205210 | OTUD7B     | NM_001266823 | C1H1orf114   | NM_001261349 | CECR5        | NM_001194230 | CDC65       | NM_001194281 |
| HECTD3    | NM_001257654 | PLEKHO1    | NM_001260966 | SLC19A2      | NM_001257523 | PEX26        | NM_001260660 | WNT10B      | NM_001194299 |
| TESK2     | NM_001267790 | MFRS21     | NM_001266914 | METTL18      | NM_001266262 | DGCR14       | NM_001194280 | PRKAG1      | NM_001266032 |
| MMACHC    | NM_001266340 | MCL1       | NM_001266501 | FMO3         | NM_001032893 | THAP7        | NM_001261590 | LMBR1L      | NM_001194754 |
| GPBP1L1   | NM_001261345 | GOLPH3L    | NM_001257573 | FMO2         | NM_001042777 | SNAP29       | NM_001261361 | TMBIM6      | NM_001195449 |
| IPP       | NM_001260743 | CDC42SE1   | NM_001257482 | PIGC         | NM_001261250 | TOP3B        | NM_001266407 | COX14       | NM_001261469 |
| PIK3R3    | NM_001266826 | SCNM1      | NM_001257712 | PRDX6        | NM_001266085 | ZNF280B      | NM_001261022 | ATF1        | NM_001261536 |
| LURAP1    | NM_001266426 | PSMD4      | NM_001136568 | CENPL        | NM_001261531 | GUCCD1       | NM_001260970 | SLC11A2     | NM_001266689 |
| UQCRH     | NM_001198720 | MRPL9      | NM_001265691 | SERPINC1     | NM_001104583 | SNRPD3       | NM_001194052 | TFCP2       | NM_001266217 |
| CMPK1     | NM_001193618 | OAZ3       | NM_001128630 | CACYBP       | NM_001266661 | CRYBB2       | NM_001122894 | SLC4A8      | NM_001258188 |
| BEND5     | NM_001266827 | LOC717324  | NM_001257530 | ASTN1        | NM_001266732 | TFIP11       | NM_001080120 | ACVR1B      | NM_001265630 |
| RAB3B     | NM_001266792 | S100A8     | NM_001266907 | PGBD2        | NM_001258110 | PITPNB       | NM_001266329 | MFSD5       | NM_001260639 |
| TXNDC12   | NM_001266161 | SNAPIN     | NM_001257650 | SH3BP5L      | NM_001261606 | XBP1         | NM_001190861 | PRR13       | NM_001266483 |
| GPX7      | NM_001159368 | ILF2       | NM_001266713 | NLRP3        | NM_001114351 | EWSR1        | NM_001266241 | MAP3K12     | NM_001260812 |
| CPT2      | NM_001265884 | TPM3       | NM_001257843 | SMYD3        | NM_001265933 | RASL10A      | NM_001260903 | NFE2        | NM_001194758 |
| MAGOH     | NM_001257602 | HAX1       | NM_001266445 | COX20        | NM_001257785 | NF2          | NM_001266255 | OR6C4       | NM_001194490 |
| TMEM59    | NM_001266204 | CHRN2      | NM_001265649 | PPPDE1       | NM_001257794 | ZMAT5        | NM_001194345 | CD63        | NM_001266295 |
| TCEANC2   | NM_001266853 | CKS1B      | NM_001265747 | AKT3         | NM_001266640 | OSM          | NM_001194474 | WIBG        | NM_001257874 |
| SSBP3     | NM_001261084 | THBS3      | NM_001260514 | GREM2        | NM_001266108 | SF3A1        | NM_001257699 | RPS26       | NM_001193581 |
| TTC4      | NM_001266162 | RIT1       | NM_001261801 | LGALS8       | NM_001266745 | GAL3ST1      | NM_001266653 | ESYT1       | NM_001194625 |
| PCSK9     | NM_001112660 | LMNA       | NM_001257893 | TBCE         | NM_001265678 | DUSP18       | NM_001261330 | MYL6        | NM_001266736 |
| JUN       | NM_001265850 | SMG5       | NM_001260844 | GGPS1        | NM_001257690 | MORC2        | NM_001261599 | RNF41       | NM_001194648 |
| ATG4C     | NM_001257887 | RHGB       | NM_001040418 | RBM34        | NM_001257648 | DRG1         | NM_001266937 | IL23A       | NM_001194669 |
| EFCAB7    | NM_001267010 | HAPLN2     | NM_001265852 | TOMM20       | NM_001261051 | YWHAH        | NM_001266591 | SPRY4       | NM_001194675 |
| JAK1      | NM_001257909 | IFI16      | NM_001261661 | KIAA1804     | NM_001265676 | C10H22orf28  | NM_001194558 | ATP5B       | NM_001195494 |
| LEPR      | NM_001032819 | TAGLN2     | NM_001265900 | NTPCR        | NM_001267032 | TMEM251      | NM_001193852 | PTGES3      | NM_001261514 |
| SLC35D1   | NM_001258070 | ATP1A2     | NM_001265686 | TSNAX        | NM_001261354 | RFBOX2       | NM_001261516 | RDH16       | NM_001194686 |
| LRRRC40   | NM_001261023 | PEA15      | NM_001198667 | EXOC8        | NM_001258061 | EIF3D        | NM_001257511 | STAC3       | NM_001194695 |

Supplemental Table 1: (iii<sub>b</sub>) H3K4me3-enriched genes in the Baboon SVZ Total progenitors

| Gene Name   | RefSeq ID    | Gene Name    | RefSeq ID    |
|-------------|--------------|-------------|--------------|-------------|--------------|-------------|--------------|--------------|--------------|
| STOM        | NM_001266229 | KIF1C       | NM_001266243 | C1QL1       | NM_001194672 | THOC1       | NM_001260975 | PSMC4        | NM_001266336 |
| TRAF1       | NM_001265893 | DERL2       | NM_001194187 | DCAKD       | NM_001194673 | ROCK1       | NM_001261134 | AKT2         | NM_001265989 |
| DBC1        | NM_001260978 | WSCD1       | NM_001257765 | GOSR2       | NM_001257778 | SNRPD1      | NM_001260829 | ADCK4        | NM_001265945 |
| TNFSF8      | NM_001266670 | TXNDC17     | NM_001266428 | CRHR1       | NM_001032803 | RBBP8       | NM_001258203 | SNRPA        | NM_001257505 |
| ATP6V1G1    | NM_001193602 | MED31       | NM_001194236 | METTL2A     | NM_001266641 | SS18        | NM_001257494 | TMEM91       | NM_001194828 |
| PRPF4       | NM_001261569 | GABARAP     | NM_001261029 | TACO1       | NM_001194703 | AQP4        | NM_001257671 | RABAC1       | NM_001260923 |
| SLC31A1     | NM_001257506 | KCTD11      | NM_001194377 | CCDC47      | NM_001261244 | TTR         | NM_001261679 | PRR19        | NM_001194317 |
| HSDL2       | NM_001199126 | PLSCR3      | NM_001265888 | PSMC5       | NM_001261301 | MAPRE2      | NM_001194241 | IRGQ         | NM_001265865 |
| UGCG        | NM_001257723 | SPEM1       | NM_001194417 | DDX5        | NM_001258162 | ZNF397      | NM_001261310 | ZNF576       | NM_001194336 |
| DNAJC25     | NM_001204971 | MPDU1       | NM_001266148 | PRKCA       | NM_001260733 | ZNF24       | NM_001266015 | PVR          | NM_001043386 |
| LPAR1       | NM_001260860 | FXR2        | NM_001266676 | PSMD12      | NM_001265853 | INO80C      | NM_001266502 | TRAPPC6A     | NM_001194478 |
| TXN         | NM_001042732 | WRAP53      | NM_001260926 | C16H17orf58 | NM_001190961 | RPRD1A      | NM_001260968 | BLOC1S3      | NM_001266400 |
| AKAP2       | NM_001204120 | TRAPPC1     | NM_001194511 | KPNA2       | NM_001266111 | C18orf10    | NM_001260587 | OPA3         | NM_001258146 |
| FAM206A     | NM_001260843 | CNTROB      | NM_001261206 | MAP2K6      | NM_001261706 | RIT2        | NM_001257707 | QPCTL        | NM_001194501 |
| RAD23B      | NM_001261788 | VAMP2       | NM_001032820 | KCNJ2       | NM_001032859 | ATP5A1      | NM_001266412 | FOXA3        | NM_001194519 |
| TMEM38B     | NM_001194325 | RANGRF      | NM_001194570 | SOX9        | NM_001032868 | ST8SIA5     | NM_001083950 | IRF2BP1      | NM_001194518 |
| TAL2        | NM_001194446 | CCDC42      | NM_001194589 | RAB37       | NM_001266608 | C18H18orf32 | NM_001190838 | AP2S1        | NM_001261143 |
| FCMD        | NM_001257495 | STX8        | NM_001265754 | HN1         | NM_001039945 | CXCC1       | NM_001266605 | TMEM160      | NM_001266299 |
| OR13C8      | NM_001194361 | HS3ST3A1    | NM_001194643 | MRPS7       | NM_001261058 | SMAD4       | NM_001261090 | NAPA         | NM_001194588 |
| PPP3R2      | NM_001195420 | COX10       | NM_001194644 | KIAA0195    | NM_001265878 | TXNL1       | NM_001261708 | GLTSCR2      | NM_001261574 |
| RNF20       | NM_001261573 | ZNF287      | NM_001266709 | SAP30BP     | NM_001261024 | RNF152      | NM_001193834 | CYTH2        | NM_001260891 |
| STX17       | NM_001194798 | UBB         | NM_001194808 | SEC14L1     | NM_001258116 | KDSR        | NM_001257943 | SPHK2        | NM_001257487 |
| SEC61B      | NM_001266938 | TOM1L2      | NM_001260762 | PGS1        | NM_001194399 | TMX3        | NM_001266505 | FUT1         | NM_001047154 |
| ALG2        | NM_001260984 | DRG2        | NM_001257836 | CYTH1       | NM_001261797 | C18orf55    | NM_001193707 | BAX          | NM_001261016 |
| C15H9orf156 | NM_001194620 | SHMT1       | NM_001257431 | C16H17orf70 | NM_001194508 | CYB5A       | NM_001266273 | LIN7B        | NM_001194649 |
| TMOD1       | NM_001265684 | MAP2K3      | NM_001265947 | SIRT7       | NM_001257960 | CNDP2       | NM_001257758 | PIH1D1       | NM_001194666 |
| MCART1      | NM_001194642 | WSP1        | NM_001261284 | MRP63       | NM_001193743 | QLC1        | NM_001265722 | IRF3         | NM_001135797 |
| TRMT10B     | NM_001257537 | LYRM9       | NM_001193351 | SAP18       | NM_001261034 | TXNL4A      | NM_001260866 | AP2A1        | NM_001266208 |
| ZBTB5       | NM_001261623 | SARM1       | NM_001265713 | ZMYM2       | NM_001265737 | C2CD4C      | NM_001194820 | TBC1D17      | NM_001266919 |
| CREB3       | NM_001265647 | KIAA0100    | NM_001194408 | PSPC1       | NM_001257902 | GAMT        | NM_001261132 | ZNF473       | NM_001260571 |
| KIAA1539    | NM_001193876 | DHRS13      | NM_001194463 | MTMR6       | NM_001267015 | FAM108A1    | NM_001267030 | IZUMO2       | NM_001194696 |
| STOML2      | NM_001260882 | NUFIP2      | NM_001261811 | CDK8        | NM_001261340 | IZUMO4      | NM_001194062 | CTU1         | NM_001194705 |
| UBAP1       | NM_001266514 | CORO6       | NM_001194512 | RASL11A     | NM_001194015 | PLEKHJ1     | NM_001266867 | PPP2R1A      | NM_001257922 |
| AQP3        | NM_001258043 | SLC6A4      | NM_001032823 | PRHOXNB     | NM_001194734 | GADD45B     | NM_001260874 | TFPT         | NM_001194720 |
| CHMP5       | NM_001266568 | TMIGD1      | NM_001194531 | POMP        | NM_001257806 | GNP7        | NM_001193395 | TSEN34       | NM_001261765 |
| SMU1        | NM_001265906 | GOSR1       | NM_001257945 | SLC7A1      | NM_001266615 | SLC39A3     | NM_001267794 | LILRA3       | NM_001040675 |
| APT4        | NM_001266434 | CCL4L1      | NM_001032873 | UBL3        | NM_001257793 | SGTA        | NM_001194732 | LILRA1       | NM_001040670 |
| NDUFB6      | NM_001260997 | OMG         | NM_001260823 | KATNAL1     | NM_001194119 | GNA11       | NM_001266856 | KIR3DL2      | NM_001104552 |
| TOPORS      | NM_001266141 | UTP6        | NM_001261608 | HMGB1       | NM_001265806 | GIPC3       | NM_001194162 | KIR3DL12     | NM_001105171 |
| ACO1        | NM_001257865 | RHBDL3      | NM_001194571 | ALOX5AP     | NM_001266489 | VMAC        | NM_001193782 | KIRDL8       | NM_001105172 |
| C15H9orf72  | NM_001257526 | ASIC2       | NM_001271252 | STAR1D3     | NM_001261243 | SLC25A23    | NM_001257915 | KIR3DL21     | NM_001104553 |
| PLAA        | NM_001260548 | CCL11       | NM_001032874 | RFC3        | NM_001266801 | MCOLN1      | NM_001260540 | LOC100125569 | NM_001105176 |
| CAAP1       | NM_001194328 | LIG3        | NM_001265970 | RFXAP       | NM_001265913 | PCP2        | NM_001127693 | FCAR         | NM_001039950 |
| ELAVL2      | NM_001261000 | FNDC8       | NM_001194617 | UFM1        | NM_001257925 | RETN        | NM_001243087 | NLRP7        | NM_001114354 |
| MTAP        | NM_001261737 | RASL10B     | NM_001194639 | STOML3      | NM_001193787 | RPS28       | NM_001193436 | ZNF581       | NM_001194834 |
| PTPLAD2     | NM_001194139 | C16H17orf66 | NM_001194645 | LHFP        | NM_001261616 | ACTL9       | NM_001194016 | ESP16.9      | NM_001171845 |
| RRAGA       | NM_001194800 | CCL3        | NM_001034200 | ELF1        | NM_001260954 | ZNF177      | NM_001266619 | ZNF805       | NM_001194103 |
| SNAPC3      | NM_001260804 | MRPL10      | NM_001260951 | KBTBD6      | NM_001266403 | UBL5        | NM_001261050 | ZNF304       | NM_001261557 |
| CER1        | NM_001194495 | PNPO        | NM_001265856 | NAA16       | NM_001266616 | ICAM3       | NM_001195749 | ZNF671       | NM_001260628 |
| RANBP6      | NM_001194574 | CDK5RAP3    | NM_001261645 | C13orf15    | NM_001193922 | CDKN2D      | NM_001266521 | ZSCAN1       | NM_001190963 |
| CDC37L1     | NM_001257827 | ATP5G1      | NM_001195495 | GTF2F2      | NM_001266711 | RAB3D       | NM_001194269 | RPS5         | NM_001265719 |
| SLC1A1      | NM_001265831 | ZNF652      | NM_001266395 | TPT1        | NM_001266379 | TMEM205     | NM_001194823 | ZBTB45       | NM_001266696 |
| VLDLR       | NM_001032907 | SPOP        | NM_001258173 | LCP1        | NM_001266307 | ELOF1       | NM_001190902 | UBE2M        | NM_001194143 |
| CBWD1       | NM_001193953 | NME2        | NM_001204518 | HTR2A       | NM_001032966 | ACP5        | NM_001258183 | GBE1         | NM_001266287 |
| TMEM252     | NM_001193966 | COX11       | NM_001195440 | MED4        | NM_001265782 | C19orf56    | NM_001194406 | CHMP2B       | NM_001266802 |
| KLF9        | NM_001265918 | COIL        | NM_001257478 | ITM2B       | NM_001258055 | WDR83       | NM_001194400 | CGGBP1       | NM_001261776 |
| C15H9orf85  | NM_001261161 | AKAP1       | NM_001261641 | LPAR6       | NM_001194165 | TNP02       | NM_001261575 | C2H3orf38    | NM_001190960 |
| CYP11D1     | NM_001246671 | MRPS23      | NM_001266408 | RCBTB1      | NM_001260614 | C19H19orf43 | NM_001194424 | PROS1        | NM_001044726 |
| RORB        | NM_001260751 | SEPT4       | NM_001266717 | ARL11       | NM_001194262 | JUNB        | NM_001194461 | ARL6         | NM_001257760 |
| NMRK1       | NM_001261283 | TRIM37      | NM_001258090 | ALG11       | NM_001190890 | KLF1        | NM_001194455 | OR5K1        | NM_001193790 |
| GNA14       | NM_001265908 | SKA2        | NM_001266054 | OR5L1       | NM_001194579 | STX10       | NM_001261693 | TOMM70A      | NM_001266153 |
| GNAQ        | NM_001261595 | C17orf71    | NM_001194385 | PCDH17      | NM_001265711 | IER2        | NM_001266014 | RPL24        | NM_001265968 |
| TLE1        | NM_001265628 | PTRH2       | NM_001194439 | PCDH9       | NM_001258186 | RLN3        | NM_001104576 | CEP97        | NM_001257570 |
| GKAP1       | NM_001266459 | VMP1        | NM_001190897 | KLHL1       | NM_001195300 | AKAP8L      | NM_001260986 | ALCAM        | NM_001257702 |
| C15H9orf64  | NM_001260888 | PPM1D       | NM_001260836 | KLF12       | NM_001258129 | CYP4F22     | NM_001194539 | CD47         | NM_001266517 |
| HNRNPK      | NM_001266946 | ZNHIT3      | NM_001195418 | COMMD6      | NM_001261673 | CYP4F12     | NM_001194560 | IFT57        | NM_001258196 |
| NTRK2       | NM_001261297 | PIGW        | NM_001257700 | FBXL3       | NM_001261635 | AP1M1       | NM_001257538 | DPPE2        | NM_001266584 |
| NAA35       | NM_001194389 | AATF        | NM_001257577 | SLITRK1     | NM_001260787 | SLC35E1     | NM_001266345 | CD200        | NM_001257544 |
| DAPK1       | NM_001257788 | SYNRG       | NM_001266089 | SLITRK5     | NM_001265627 | USE1        | NM_001257921 | SLC35A5      | NM_001260559 |
| CDK20       | NM_001032925 | HNF1B       | NM_001194548 | SOX21       | NM_001193732 | ABHD8       | NM_001265784 | NAA50        | NM_001261371 |
| NAIF1       | NM_001193947 | C16H17orf96 | NM_001193705 | DNAJC3      | NM_001266404 | MRPL34      | NM_001193420 | ATP6V1A      | NM_001260658 |
| FAM102A     | NM_001266645 | PSMB3       | NM_001257817 | RAP2A       | NM_001193832 | BST2        | NM_001161666 | QTRTD1       | NM_001265882 |
| CDK9        | NM_001266230 | LASP1       | NM_001265873 | STK24       | NM_001266859 | COPE        | NM_001194660 | IGSF11       | NM_001257906 |
| RPL12       | NM_001193560 | PGAP3       | NM_001265734 | UBAC2       | NM_001171176 | LPAR2       | NM_001266718 | TMEM39A      | NM_001258076 |
| HSPA5       | NM_001266596 | PSMD3       | NM_001260856 | TEX30       | NM_001266631 | PLEKHF1     | NM_001193737 | NR112        | NM_001032882 |
| SYK         | NM_001261035 | CASC3       | NM_001260566 | ARGLU1      | NM_001194022 | CEBPQ       | NM_001260600 | HCL51        | NM_001257947 |
| AUH         | NM_001257675 | SMARCE1     | NM_001261306 | ABHD13      | NM_001190904 | LSM14A      | NM_001257954 | EAF2         | NM_001193490 |
| NFIL3       | NM_001266913 | KRTAP4-1    | NM_001193889 | ING1        | NM_001265941 | KIAA0355    | NM_001193886 | FAM162A      | NM_001261743 |
| CENPP       | NM_001194801 | JUP         | NM_001266127 | ANKRD10     | NM_001257442 | SCN1B       | NM_001258167 | WDR5B        | NM_001194550 |
| OGN         | NM_001261240 | FKBP10      | NM_001260551 | F7          | NM_001080136 | PSENBEN     | NM_001194826 | SEC22A       | NM_001194575 |
| BICD2       | NM_001257956 | DNAJC7      | NM_001261251 | F10         | NM_001104584 | HCST        | NM_001032835 | PTPLB        | NM_001261129 |
| C15H9orf89  | NM_001260938 | RAB5C       | NM_001266171 | ZNF828      | NM_001260800 | SDHA1F      | NM_001194164 | UMPS         | NM_001261598 |
| HIATL1      | NM_001194284 | HCRT        | NM_001194432 | MC5R        | NM_001193897 | COX7AH      | NM_001040278 | ITGB5        | NM_001266206 |
| FBP1        | NM_001193652 | HSD17B1     | NM_001047132 | PSMG2       | NM_001193620 | ZNF790      | NM_001261671 | CHCHD6       | NM_001266664 |
| HSD17B3     | NM_001266504 | FAM134C     | NM_001194496 | CHMP1B      | NM_001194816 | ZNF345      | NM_001194827 | WNNTA        | NM_001265938 |
| GLOD4       | NM_001265952 | TUBG1       | NM_001261011 | NAPG        | NM_001258101 | SPINT2      | NM_001194343 | RPL32        | NM_001193573 |
| BHLHA9      | NM_001194728 | EZH1        | NM_001257456 | TWSG1       | NM_001257525 | ACTN4       | NM_001261802 | VGLL4        | NM_001194848 |
| INPP5K      | NM_001260646 | BECN1       | NM_001266885 | NDUFV2      | NM_001257585 | HNRNPL      | NM_001266000 | SLC6A1       | NM_001257768 |
| PAFAH1B1    | NM_001258130 | RPL27       | NM_001265822 | ZFP161      | NM_001265870 | NFKBIB      | NM_001258157 | SEC13        | NM_001266970 |
| EMC6        | NM_001266545 | BRCA1       | NM_001114949 | SMCHD1      | NM_001258166 | MED29       | NM_001266003 | NYFB         | NM_001257720 |
| CYB5D2      | NM_001193968 | TMEM106A    | NM_001194813 | NDC80       | NM_001265902 | SUP25H      | NM_001266951 | CRELD1       | NM_001266467 |
| PSMB6       | NM_001195714 | GJC1        | NM_001194656 | TYMS        | NM_001195507 | DYRK1B      | NM_001266667 | JAGN1        | NM_001260648 |

Supplemental Table 1: (iii) H3K4me3-enriched genes in the Baboon SVZ Total progenitors

| Gene Name  | RefSeq ID    | Gene Name | RefSeq ID    | Gene Name    | RefSeq ID    | Gene Name  | RefSeq ID    | Gene Name   | RefSeq ID    |
|------------|--------------|-----------|--------------|--------------|--------------|------------|--------------|-------------|--------------|
| SYNCRIP    | NM_001193845 | COPS4     | NM_001105280 | BRD9         | NM_001261189 | CDC42SE2   | NM_001257601 | EID1        | NM_001265838 |
| POLR1D     | NM_001257459 | HNRNP     | NM_001260807 | CCDC127      | NM_001194083 | IL3        | NM_001101734 | COPS2       | NM_001193601 |
| SLC35A1    | NM_001266759 | GK2       | NM_001193898 | MED10        | NM_001260853 | PDLIM4     | NM_001257803 | GABPB1      | NM_001194637 |
| PNRC1      | NM_001266366 | CCNI      | NM_001195445 | PAPD7        | NM_001261299 | UQCRCQ     | NM_001198732 | USP8        | NM_001265619 |
| ANKRD6     | NM_001261717 | STBD1     | NM_001194876 | ADCY2        | NM_001265652 | VDAC1      | NM_001261754 | SCG3        | NM_001266092 |
| LYRM2      | NM_001265787 | CXCL11    | NM_001032950 | C6H5orf49    | NM_001193716 | SKP1       | NM_001193590 | TMOD3       | NM_001266419 |
| GJA10      | NM_001193951 | CXCL9     | NM_001032936 | SEMA5A       | NM_001266494 | UBE2B      | NM_001194433 | RSL24D1     | NM_001258062 |
| FUT9       | NM_001194065 | CDKL2     | NM_001136013 | CCT5         | NM_001258189 | SAR1B      | NM_001261028 | RAB27A      | NM_001193855 |
| UFL1       | NM_001266325 | THAP6     | NM_001261521 | CMBL         | NM_001193768 | C6H5orf24  | NM_001194883 | MNS1        | NM_001266861 |
| NDUFAF4    | NM_001260754 | PARM1     | NM_001266923 | DAP          | NM_001257566 | LECT2      | NM_001194884 | LDHAL6B     | NM_001194113 |
| KLHL32     | NM_001261738 | CXCL3     | NM_001032879 | FAM105A      | NM_001193791 | SPOCK1     | NM_001266535 | FAM81A      | NM_001257823 |
| FBXL4      | NM_001260363 | ALB       | NM_001195649 | FAM134B      | NM_001261775 | CDC23      | NM_001257557 | GTF2A2      | NM_001258054 |
| FAXC       | NM_001266112 | DCK       | NM_001257554 | LOC100499546 | NM_001195043 | FAM53C     | NM_001266240 | RPS27L      | NM_001193433 |
| DCUN1D1    | NM_001257454 | IGJ       | NM_001260886 | DROSHA       | NM_001261157 | LRRTM2     | NM_001266604 | RAB8B       | NM_001257955 |
| BVES       | NM_001266212 | ODAM      | NM_001080135 | C6H5orf22    | NM_001193783 | MATR3      | NM_001205238 | USP3        | NM_001266070 |
| PREP       | NM_001257914 | UGT2B9*2  | NM_001033027 | SUB1         | NM_001261211 | PFDN1      | NM_001266275 | SNX1        | NM_001266850 |
| C4H6orf203 | NM_001266984 | SUMO2     | NM_001198691 | AMACR        | NM_001266997 | HBEGF      | NM_001257469 | TRIP4       | NM_001266220 |
| PDSS2      | NM_001266911 | LPHN3     | NM_001261704 | RAD1         | NM_001261160 | APBB3      | NM_001266106 | PLEKH02     | NM_001266727 |
| GTF2H5     | NM_001190969 | POLR2B    | NM_001261497 | BRIX1        | NM_001261247 | NDUFA2     | NM_001261499 | CLPX        | NM_001266087 |
| ZDHHC14    | NM_001266260 | C4orf14   | NM_001193688 | LMBRD2       | NM_001266468 | IK         | NM_001256897 | PTPLAD1     | NM_001266546 |
| TFB1M      | NM_001261482 | SRP72     | NM_001260722 | SLC1A3       | NM_001266066 | WDR55      | NM_001256898 | RAB11A      | NM_001261789 |
| CNKSR3     | NM_001265835 | PPAT      | NM_001260819 | PTGER4       | NM_001266046 | ZMAT2      | NM_001261767 | RPL4        | NM_001266200 |
| OPRM1      | NM_001032824 | TMEM165   | NM_001266322 | ITTC33       | NM_001261196 | PCDH8      | NM_001193851 | SMAD3       | NM_001266160 |
| VIP        | NM_001260752 | KIT       | NM_001266095 | C6H5orf51    | NM_001193823 | RNF14      | NM_001260813 | C7H15orf61  | NM_001194312 |
| C4H6orf211 | NM_001257928 | CHIC2     | NM_001257545 | SEPP1        | NM_001159490 | GNPDA1     | NM_001257944 | PIAS1       | NM_001256301 |
| ZBTB2      | NM_001258066 | USP46     | NM_001266693 | NIM1         | NM_001266646 | NDFIP1     | NM_001194017 | ANP32A      | NM_001260818 |
| GINM1      | NM_001193728 | MAPK10    | NM_001260857 | HMGCS1       | NM_001260869 | FGF1       | NM_001266029 | RPLP1       | NM_001193574 |
| UST        | NM_001257513 | C5H4orf36 | NM_001190949 | PAIP1        | NM_001266304 | YIPF5      | NM_001260957 | SENP8       | NM_001193847 |
| C6orf103   | NM_001193764 | HSD17B11  | NM_001257582 | FGF10        | NM_001193950 | SPINK9     | NM_001193441 | HEXA        | NM_001261529 |
| FBXO30     | NM_001261073 | NUDT9     | NM_001261782 | PELO         | NM_001190867 | GRPEL2     | NM_001261153 | NEO1        | NM_001261500 |
| PLAGL1     | NM_001260788 | SPP1      | NM_001261806 | ITGA2        | NM_001260822 | CSNK1A1    | NM_001261235 | NPTN        | NM_001266786 |
| PEX3       | NM_001257927 | ABCG2     | NM_001032919 | IL6ST        | NM_001265991 | RBM22      | NM_001257496 | PML         | NM_001042434 |
| AIG1       | NM_001260565 | PPM1K     | NM_001266195 | C5orf35      | NM_001194171 | DCTN4      | NM_001260767 | SEMA7A      | NM_001266762 |
| VTA1       | NM_001261520 | NAP1L5    | NM_001266934 | RAB3C        | NM_001265995 | CCDC69     | NM_001260862 | SCAMP5      | NM_001260562 |
| ABRACL     | NM_001193359 | HPGDS     | NM_001194212 | DEPDC1B      | NM_001194881 | G3BP1      | NM_001261742 | SIN3A       | NM_001266100 |
| HEBP2      | NM_001194081 | TSPAN5    | NM_001194290 | ELOVL7       | NM_001194255 | GLRA1      | NM_001194977 | IMP3        | NM_001261712 |
| IFNGR1     | NM_001266300 | EIF4E     | NM_001266219 | NDUFAF2      | NM_001266244 | SAP30L     | NM_001261790 | FBXO22      | NM_001266238 |
| TCF21      | NM_001260958 | METAP1    | NM_001261513 | SMIM15       | NM_001190845 | C6H5orf4   | NM_001257519 | HMG20A      | NM_001261564 |
| RPS12      | NM_001195665 | DDIT4L    | NM_001194403 | KIF2A        | NM_001266858 | MRPL22     | NM_001194584 | WDR61       | NM_001260815 |
| MED23      | NM_001261479 | PPP3CA    | NM_001261563 | SREK1P1      | NM_001261537 | ITK        | NM_001266444 | IREB2       | NM_001260947 |
| C4H6orf58  | NM_001193718 | NFKB1     | NM_001266053 | PPWD1        | NM_001266376 | THG1L      | NM_001194604 | MORF4L1     | NM_001266183 |
| ECHDC1     | NM_001261505 | UBE2D3    | NM_001261204 | C6H5orf44    | NM_001266356 | UBLCP1     | NM_001266391 | STARD5      | NM_001260916 |
| HEY2       | NM_001194380 | TACR3     | NM_001037862 | PIK3R1       | NM_001261197 | TTC1       | NM_001266114 | C7H15orf40  | NM_001261261 |
| CLVS2      | NM_001194395 | INTS12    | NM_001260673 | CCNB1        | NM_001261149 | SLU7       | NM_001266559 | RPS17L      | NM_001265804 |
| SERINC1    | NM_001257550 | SGMS2     | NM_001193740 | CDK7         | NM_001266657 | GABRB2     | NM_001168328 | PDE8A       | NM_001266644 |
| GJA1       | NM_001261067 | HADH      | NM_001261209 | SMN1         | NM_001260664 | GABRA1     | NM_001260932 | SEC11A      | NM_001261576 |
| NUS1       | NM_001194492 | PLA2G12A  | NM_001194877 | MAP1B        | NM_001265687 | MAT2B      | NM_001257473 | KLHL25      | NM_001258115 |
| FAM162B    | NM_001194873 | ELOVL6    | NM_001266921 | FCHO2        | NM_001257784 | RARS       | NM_001261218 | NTRK3       | NM_001265637 |
| RWDD1      | NM_001266855 | NEUROG2   | NM_001193972 | UTP15        | NM_001260832 | KCNMB1     | NM_001266453 | MRPS11      | NM_001261578 |
| TSPYL4     | NM_001194874 | TRAM1L1   | NM_001261483 | ENC1         | NM_001260583 | UBTD2      | NM_001194090 | ABHD2       | NM_001261263 |
| NT5DC1     | NM_001261622 | METTL14   | NM_001261720 | NSA2         | NM_001261761 | DUSP1      | NM_001257450 | AP3S2       | NM_001194004 |
| HS3ST5     | NM_001193687 | MAD2L1    | NM_001195813 | FAM169A      | NM_001194120 | RPL26L1    | NM_001267013 | GDGPG1      | NM_001194046 |
| C4H6orf225 | NM_001193364 | NDNF      | NM_001193470 | AGGF1        | NM_001261037 | ATP6V0E1   | NM_001261126 | SV2B        | NM_001260629 |
| TRAF3IP2   | NM_001266136 | CCNA2     | NM_001266158 | LHFPL2       | NM_001194391 | DRD1       | NM_001206975 | RCMA        | NM_001266917 |
| RPF2       | NM_001258154 | IL2       | NM_001047130 | HOMER1       | NM_001261570 | THOC3      | NM_001257488 | LRRC28      | NM_001257772 |
| FIG4       | NM_001172433 | IL21      | NM_001194242 | PAPD4        | NM_001261739 | FUNDC1     | NM_001266574 | MEF2A       | NM_001260914 |
| SMPD2      | NM_001266860 | ANKRD50   | NM_001266441 | ZCCHC9       | NM_001195739 | HIGD2A     | NM_001257901 | ASB7        | NM_001266289 |
| SNX3       | NM_001257953 | SLC25A31  | NM_001194300 | RPS23        | NM_001193580 | B4GALT7    | NM_001260676 | ALDH1A3     | NM_001266556 |
| OSTM1      | NM_001261748 | BANF1     | NM_001193373 | CCNH         | NM_001266446 | RMND5B     | NM_001261593 | OR4F6       | NM_001193818 |
| SOD2       | NM_001032805 | SLC7A11   | NM_001266291 | MEF2C        | NM_001266447 | CLK4       | NM_001257694 | OSGEP       | NM_001257838 |
| WTAP       | NM_001260846 | MGARP     | NM_001193816 | CETN3        | NM_001266092 | MGAT4B     | NM_001266822 | TMEM55B     | NM_001194893 |
| MRPL18     | NM_001265858 | RAB33B    | NM_001257437 | MBLAC2       | NM_001193835 | RASGEF1C   | NM_001194225 | PNP         | NM_001193551 |
| PLG        | NM_001043075 | ELMOD2    | NM_001193877 | ARRDC3       | NM_001260940 | MGAT1      | NM_001257830 | RNASE4      | NM_001261770 |
| PACRG      | NM_001263357 | ZNF330    | NM_001266710 | FAM172A      | NM_001193887 | NIPA2      | NM_001194886 | RNASE1      | NM_001044738 |
| BRP44L     | NM_001260570 | IL15      | NM_001044731 | RHOBTB3      | NM_001260883 | NDN        | NM_001172102 | TPPP2       | NM_001193990 |
| CCR6       | NM_001032935 | SMARCA5   | NM_001266324 | GLRX         | NM_001198722 | SNRPN      | NM_001261205 | TOX4        | NM_001172413 |
| PSMB1      | NM_001260636 | ABCE1     | NM_001266954 | HNRNPC       | NM_001261233 | UBE3A      | NM_001261040 | RBM23       | NM_001266374 |
| GPR78      | NM_001193900 | LSM6      | NM_001266965 | LIX1         | NM_001194032 | NDNL2      | NM_001257507 | PRMT5       | NM_001258067 |
| GRPEL1     | NM_001261551 | EDNRA     | NM_001261492 | RIOK2        | NM_001260597 | CHRNA7     | NM_001032883 | C7H14orf119 | NM_001190873 |
| MRFAP1     | NM_001193938 | TMEM184C  | NM_001260921 | RGMB         | NM_001265620 | SCG5       | NM_001260672 | NGDN        | NM_001266254 |
| LYAR       | NM_001258141 | FBXW7     | NM_001257948 | FAM174A      | NM_001194071 | CHRM5      | NM_001032931 | NM9SF1      | NM_001266461 |
| ZNF518B    | NM_001261812 | ARFIP1    | NM_001266175 | ST8SIA4      | NM_001266232 | EMC4       | NM_001260989 | NEED8       | NM_001266888 |
| HS3ST1     | NM_001194098 | TLR2      | NM_001130425 | GIN1         | NM_001194084 | ATPBD4     | NM_001266595 | WDR12       | NM_001260900 |
| NKX3-2     | NM_001194111 | LRAT      | NM_001193939 | C6H5orf30    | NM_001194882 | SPRED1     | NM_001204360 | G2E3        | NM_001194652 |
| CD38       | NM_001261773 | NPY2R     | NM_001032832 | NUDT12       | NM_001194123 | GPR176     | NM_001266154 | SCFD1       | NM_001266523 |
| LAP3       | NM_001260698 | GUCY1B3   | NM_001266845 | EFGA5        | NM_001265728 | SRP14      | NM_001265919 | COCH        | NM_001260563 |
| DCAF16     | NM_001194742 | GRIA2     | NM_001185014 | SLC25A46     | NM_001266009 | VPS18      | NM_001257653 | HECTD1      | NM_001261259 |
| LCORL      | NM_001172360 | PPID      | NM_001265834 | STARDA4      | NM_001260934 | CHP1       | NM_001266371 | HTD2        | NM_001194671 |
| DHX15      | NM_001260731 | C5H4orf43 | NM_001266649 | NREP         | NM_001193355 | OIP5       | NM_001258125 | ARHGAP5     | NM_001198663 |
| ANAPC4     | NM_001266920 | SC4MOL    | NM_001260803 | DCP2         | NM_001266464 | TMEM87A    | NM_001261600 | SPTSSA      | NM_001193346 |
| RBPJ       | NM_001260693 | CBR4      | NM_001193693 | TSSK1B       | NM_001193468 | GANC       | NM_001257679 | CFL2        | NM_001261184 |
| TBC1D19    | NM_001260783 | C5H4orf27 | NM_001260760 | TRIM36       | NM_001266479 | SNAP25     | NM_001261338 | SRP54       | NM_001260852 |
| C5H4orf19  | NM_001257674 | SAP30     | NM_001266332 | LOC696437    | NM_001261210 | LRRC57     | NM_001194887 | FAM177A1    | NM_001266493 |
| UGDH       | NM_001261103 | FBXO8     | NM_001265874 | CDO1         | NM_001260608 | CDAN1      | NM_001194310 | PSMA6       | NM_001193553 |
| UBE2K      | NM_001260841 | AGA       | NM_001199093 | DTWD2        | NM_001261379 | PDIA3      | NM_001195716 | INSM2       | NM_001198728 |
| RHOH       | NM_001260809 | ODZ3      | NM_001193929 | TNFAIP8      | NM_001261083 | HYPK       | NM_001194889 | BRMS1L      | NM_001261019 |
| TMEM33     | NM_001261135 | IRF2      | NM_001135793 | SFRFBP1      | NM_001266668 | MFAF1      | NM_001266342 | PAX9        | NM_001040417 |
| GRXCR1     | NM_001194126 | TLR3      | NM_001036685 | SNX24        | NM_001266411 | CTDSP2     | NM_001266809 | SLC25A21    | NM_001266544 |
| GNPDA2     | NM_001194875 | CYP4V2    | NM_001193838 | PPIC         | NM_001193973 | EIF3J      | NM_001261052 | SEC23A      | NM_001261363 |
| SLAIN2     | NM_001266145 | FRG1      | NM_001261228 | CSNK1G3      | NM_001258050 | C7H15orf43 | NM_001193506 | TRAPPC6B    | NM_001261238 |
| OCIA2      | NM_001266991 | EXOC3     | NM_001260656 | ISOC1        | NM_001266437 | DUOXA2     | NM_001194505 | CTAGE5      | NM_001195820 |
| MRPS18C    | NM_001266126 | TPPP      | NM_001266695 | HINT1        | NM_001258104 | MYE2F      | NM_001261256 | KLHL28      | NM_001261270 |

Supplemental Table 1: (iii) H3K4me3-enriched genes in the Baboon SVZ Total progenitors

| Gene Name   | RefSeq ID    | Gene Name  | RefSeq ID    | Gene Name  | RefSeq ID    | Gene Name   | RefSeq ID    | Gene Name   | RefSeq ID    |
|-------------|--------------|------------|--------------|------------|--------------|-------------|--------------|-------------|--------------|
| DDIT3       | NM_001194700 | TNFAIP6    | NM_001265940 | BOK        | NM_001266922 | ERCC3       | NM_001266408 | RAB6A       | NM_001261303 |
| PIP4K2C     | NM_001261154 | CACNB4     | NM_001261360 | PDCD1      | NM_001114358 | LIMS2       | NM_001265694 | PAAF1       | NM_001265839 |
| METTL21B    | NM_001194759 | ARL6IP6    | NM_001260607 | MYT1L      | NM_001265731 | POLR2D      | NM_001267787 | PGM2L1      | NM_001265664 |
| GEMIN7      | NM_001194715 | RPRM       | NM_001193741 | RNASEH1    | NM_001257858 | MZT2B       | NM_001193944 | LIP2T       | NM_001194503 |
| USP15       | NM_001266957 | KCNJ3      | NM_001261696 | RPS7       | NM_001266796 | IMP4        | NM_001266231 | SPCS2       | NM_001265830 |
| C11H12orf66 | NM_001194721 | NR4A2      | NM_001266910 | IAH1       | NM_001193736 | CFC1        | NM_001190851 | RPS3        | NM_001266290 |
| XPOT        | NM_001258184 | GPD2       | NM_001261055 | PDIA6      | NM_001266635 | FAM168B     | NM_001194008 | SERPINH1    | NM_001261087 |
| TBK1        | NM_001261193 | ACVR1C     | NM_001266690 | ROCK2      | NM_001260913 | BET1L       | NM_001257611 | ACER3       | NM_001266751 |
| MSRB3       | NM_001257851 | WDSUB1     | NM_001258191 | FAM84A     | NM_001266538 | TOLLIP      | NM_001261271 | AQP11       | NM_001266495 |
| LLPH        | NM_001266795 | PSMD14     | NM_001261490 | DDX1       | NM_001266562 | CARS        | NM_001266326 | AAMDC       | NM_001266228 |
| CAND1       | NM_001261692 | SLC4A10    | NM_001266840 | LAPTM4A    | NM_001261172 | ORAOV1      | NM_001194174 | NDUFC2      | NM_001266174 |
| DYRK2       | NM_001261216 | PPP4       | NM_001039190 | C13H2orf43 | NM_001194777 | SUV420H1    | NM_001260793 | RPS2        | NM_001193577 |
| IL22        | NM_001194724 | GCA        | NM_001266140 | DNAJC27    | NM_001257595 | TBC1D10C    | NM_001260757 | FAM181B     | NM_001194034 |
| RAP1B       | NM_001198678 | CSRNP3     | NM_001257746 | KIF3C      | NM_001266930 | SSH3        | NM_001266980 | PRCP        | NM_001261249 |
| SLC35E3     | NM_001194726 | LASS6      | NM_001266123 | HADHA      | NM_001265890 | KDM2A       | NM_001266388 | CCDC90B     | NM_001260811 |
| MDM2        | NM_001266402 | BBS5       | NM_001194768 | EPT1       | NM_001135563 | YIF1A       | NM_001194498 | TMEM126B    | NM_001267027 |
| LYZ         | NM_001101733 | PIIG       | NM_001266543 | PREB       | NM_001266941 | KLC2        | NM_001261630 | TMEM126A    | NM_001261136 |
| CNOT2       | NM_001265869 | PHOSPHO2   | NM_001194769 | ATRAID     | NM_001193926 | CCDC85B     | NM_001261659 | PICALM      | NM_001266499 |
| THAP2       | NM_001193501 | KLHL23     | NM_001260558 | MPV17      | NM_001260977 | CFL1        | NM_001266605 | EED         | NM_001261266 |
| TPH2        | NM_001039946 | GORASP2    | NM_001261707 | SNX17      | NM_001265975 | FAM89B      | NM_001194782 | C14H11orf73 | NM_001260980 |
| KRR1        | NM_001265714 | CYBRD1     | NM_001193742 | IFT172     | NM_001257589 | FRMD8       | NM_001260904 | CTSC        | NM_001195651 |
| OSBPL8      | NM_001260879 | DYNC112    | NM_001261589 | SUPT7L     | NM_001260750 | CDC42EP2    | NM_001194619 | CHORDC1     | NM_001257756 |
| ZDHC17      | NM_001260892 | SLC25A12   | NM_001261376 | MRPL33     | NM_001193419 | MRPL49      | NM_001266995 | C14H11orf75 | NM_001193371 |
| PPP1R12A    | NM_001266093 | DLX1       | NM_001260619 | PPP1CB     | NM_001260652 | FAU         | NM_001194638 | TAF1D       | NM_001257644 |
| DDT         | NM_001257668 | OLA1       | NM_001266628 | EHD3       | NM_001257730 | GPHA2       | NM_001194654 | FOLR4       | NM_001193805 |
| CHCHD4      | NM_001198709 | ATP5G3     | NM_001198734 | DPY30      | NM_001261093 | EHD1        | NM_001261195 | ANKRD49     | NM_001260919 |
| LSM3        | NM_001261364 | HOXD12     | NM_001194772 | YIPF4      | NM_001257440 | RASGRP2     | NM_001261279 | CWC15       | NM_001266625 |
| CCDC174     | NM_001193964 | NFE2L2     | NM_001257607 | EIF2AK2    | NM_001083948 | GPR137      | NM_001261715 | SRSF8       | NM_001266335 |
| MRPS25      | NM_001257670 | PRKRA      | NM_001260842 | CYP1B1     | NM_001266868 | FKBP2       | NM_001266815 | SESN3       | NM_001266247 |
| TMCC1       | NM_001261150 | SESTD1     | NM_001257515 | SRSF7      | NM_001195586 | COX8A       | NM_001266102 | FAM76B      | NM_001193920 |
| H1FX        | NM_001266083 | UBE2E3     | NM_001257571 | SLC8A1     | NM_001032861 | C14H11orf84 | NM_001194689 | JRKL        | NM_001265892 |
| C11H3orf37  | NM_001194040 | PDE1A      | NM_001257584 | COX7A2L    | NM_001266821 | PLA2G16     | NM_001257427 | BIRC2       | NM_001261321 |
| GP9         | NM_001142313 | NCKAP1     | NM_001266519 | MTA3       | NM_001265625 | CHRM1       | NM_001032945 | DCUN1D5     | NM_001260996 |
| RPN1        | NM_001195652 | DUSP19     | NM_001194218 | PPM1B      | NM_001266202 | STX5        | NM_001261004 | CASP12      | NM_001042431 |
| TPRA1       | NM_001261656 | NUP35      | NM_001266251 | PREPL      | NM_001194545 | TMEM179B    | NM_001194702 | CASP4       | NM_001260956 |
| C11H12orf29 | NM_001258198 | ZC3H15     | NM_001258198 | SOCS5      | NM_001266928 | TTC9C       | NM_001194704 | AASDHPPT    | NM_001171189 |
| EPYC        | NM_001194215 | ITGAV      | NM_001265953 | EPCAM      | NM_001040029 | BSCL2       | NM_001260552 | ELMOD1      | NM_001266487 |
| COX7C       | NM_001267540 | TFPI       | NM_001195022 | FOXN2      | NM_001261043 | SCGB1D1     | NM_001193438 | SLC35F2     | NM_001260513 |
| NUDT4       | NM_001261255 | COL3A1     | NM_001266039 | CHAC2      | NM_001194778 | FTH1        | NM_001195380 | ACAT1       | NM_001265693 |
| PLXNC1      | NM_001261691 | ASNSD1     | NM_001194770 | ERLEC1     | NM_001194631 | SDHAF2      | NM_001193692 | C14H11orf87 | NM_001194288 |
| NDUFA12     | NM_001194335 | OSGEPL1    | NM_001261190 | GPR75      | NM_001204509 | PGA4        | NM_001104594 | C14H11orf1  | NM_001194787 |
| METAP2      | NM_001266460 | ORMDL1     | NM_001266349 | RPS27A     | NM_001193586 | PRPF19      | NM_001261081 | DLAT        | NM_001257575 |
| NTN4        | NM_001266055 | MFSD6      | NM_001265700 | CCDC104    | NM_001190915 | MRPL16      | NM_001266431 | C14H11orf57 | NM_001194375 |
| CDK17       | NM_001194763 | NAB1       | NM_001257641 | PDX13      | NM_001195570 | OR5AN1      | NM_001193824 | SDHD        | NM_001261763 |
| TMPO        | NM_001261527 | LOC694510  | NM_001266816 | XPO1       | NM_001266844 | GLYAT       | NM_001257270 | ZBTB16      | NM_001257623 |
| SLC25A3     | NM_001257587 | OBFC2A     | NM_001261728 | FAM161A    | NM_001194624 | OR10Q1      | NM_001193880 | REB7        | NM_001261071 |
| SCYL2       | NM_001266890 | SDPR       | NM_001265645 | EHBP1      | NM_001261566 | C14H11orf31 | NM_001159501 | REXO2       | NM_001193813 |
| DRAM1       | NM_001193971 | SLC39A10   | NM_001260918 | UGP2       | NM_001261518 | TMX2        | NM_001195759 | PAFAH1B2    | NM_001257739 |
| NUP37       | NM_001260738 | GTF3C3     | NM_001257564 | PEL1       | NM_001260952 | TIMM10      | NM_001261523 | AMICA1      | NM_001261678 |
| HSP90B1     | NM_001195524 | C12H2orf66 | NM_001190741 | SERTAD2    | NM_001261684 | SSRP1       | NM_001257891 | CD3G        | NM_001266295 |
| C11H12orf73 | NM_001193345 | SF3B1      | NM_001265963 | SPRED2     | NM_001261100 | OR4B1       | NM_001194287 | ATP5L       | NM_001258127 |
| CHST11      | NM_001258082 | COQ10B     | NM_001195786 | C1D        | NM_001193604 | NDUFS3      | NM_001194303 | ARCN1       | NM_001265905 |
| TCP11L2     | NM_001261173 | MOBK13     | NM_001257738 | CNRIP1     | NM_001266378 | DBD2        | NM_001260837 | HMB5        | NM_001266660 |
| POLR3B      | NM_001266933 | RFTN2      | NM_001266607 | ANXA4      | NM_001266953 | PAC3IN3     | NM_001266225 | CBL         | NM_001258147 |
| RFX4        | NM_001261061 | PLCL1      | NM_001260854 | TIA1       | NM_001261758 | C14H11orf49 | NM_001267006 | RNF26       | NM_001266883 |
| PRDM4       | NM_001257560 | C2orf60    | NM_001193883 | FAM136A    | NM_001267012 | HARBI1      | NM_001261506 | OAF         | NM_001265793 |
| SART3       | NM_001257555 | C12H2orf47 | NM_001193896 | MPHOSPH10  | NM_001266435 | PHF21A      | NM_001265672 | SC5DL       | NM_001257517 |
| ISCU        | NM_001261474 | SPATS2L    | NM_001260595 | CCT7       | NM_001265751 | SLC35C1     | NM_001258150 | UBASH3B     | NM_001261286 |
| USP30       | NM_001257829 | CLK1       | NM_001261781 | STAMBP     | NM_001260604 | ALKBH3      | NM_001190865 | HSPA8       | NM_001261657 |
| KCTD10      | NM_001261187 | FAM126B    | NM_001194005 | MRPL53     | NM_001194467 | API5        | NM_001257933 | OR6X1       | NM_001194286 |
| GIT2        | NM_001266994 | ALS2CR4    | NM_001257889 | POLE4      | NM_001261810 | C14H11orf74 | NM_001267023 | OR10G7      | NM_001194295 |
| PPP1CC      | NM_001257831 | BMPR2      | NM_001260859 | CKB        | NM_001267031 | COMMD9      | NM_001266242 | OR8B8       | NM_001193494 |
| BRAP        | NM_001265936 | CD28       | NM_001042641 | REG1B      | NM_001194568 | TRIM44      | NM_001260523 | SIAE        | NM_001261504 |
| MAPKAPK5    | NM_001257850 | EEF1B2     | NM_001266385 | LRRTM1     | NM_001257467 | ELF5        | NM_001194687 | NRGN        | NM_001267599 |
| ADAM1       | NM_001195734 | GPR1       | NM_001047129 | TMSB10     | NM_001193442 | LMO2        | NM_001266207 | ESAM        | NM_001257484 |
| TRAFD1      | NM_001266507 | CREB1      | NM_001261120 | RETSAT     | NM_001257563 | DNAJC24     | NM_001261745 | STT3A       | NM_001257421 |
| PTPN11      | NM_001261109 | METTL21A   | NM_001194117 | MAT2A      | NM_001195289 | METTL15     | NM_001260955 | PATE4       | NM_001194407 |
| CCDC42B     | NM_001194263 | CRYGD      | NM_001265732 | ST3GAL5    | NM_001257500 | LIN7C       | NM_001266451 | FAM118B     | NM_001260816 |
| SDS         | NM_001194522 | RPE        | NM_001261714 | RNF103     | NM_001266577 | ANO3        | NM_001265904 | SRPR        | NM_001266746 |
| MED13L      | NM_001261532 | LANCL1     | NM_001258121 | IMPACT     | NM_001266051 | SVIP        | NM_001261697 | BARX2       | NM_001194603 |
| TESC        | NM_001257539 | IKZF2      | NM_001258078 | KCNIP3     | NM_001257864 | GAS2        | NM_001257624 | TMEM45B     | NM_001194533 |
| RFC5        | NM_001261662 | XRCC5      | NM_001257366 | CIAO1      | NM_001258112 | MRGPRX2     | NM_001040422 | VPS26B      | NM_001257745 |
| PEBP1       | NM_001246199 | ARPC2      | NM_001261239 | ACTR1B     | NM_001257417 | TSG101      | NM_001195481 | ZMYND19     | NM_001194731 |
| RAB35       | NM_001194766 | AAMP       | NM_001171059 | INPP4A     | NM_001261619 | LDHA        | NM_001257735 | TMEM203     | NM_001261202 |
| RPLP0       | NM_001195428 | CRYBA2     | NM_001194054 | COA5       | NM_001267542 | RPS13       | NM_001265917 | LCN9        | NM_001171841 |
| RNF10       | NM_001260820 | CNPPD1     | NM_001194773 | MGAT4A     | NM_001194224 | C14H11orf58 | NM_001193864 | FAM163B     | NM_001194739 |
| UNC119B     | NM_001266482 | STK16      | NM_001266973 | LYG1       | NM_001194261 | CYP2R1      | NM_001193958 | SURF6       | NM_001194177 |
| RNF34       | NM_001265820 | DNAJB2     | NM_001266581 | EIF5B      | NM_001261610 | PSMA1       | NM_001261021 | NTNG2       | NM_001265764 |
| VPS33A      | NM_001257848 | INHA       | NM_001032955 | RPL31      | NM_001257287 | TBTD10      | NM_001265857 | MED27       | NM_001266508 |
| GPR81       | NM_001145254 | SCG2       | NM_001194420 | CREG2      | NM_001194358 | ARNTL       | NM_001257837 | UCK1        | NM_001194319 |
| ABC9        | NM_001261296 | KIAA1486   | NM_001194144 | MRPS9      | NM_001257485 | DKK3        | NM_001265749 | FAM78A      | NM_001194327 |
| RILPL2      | NM_001260833 | TM4SF20    | NM_001194504 | C13H2orf40 | NM_001194457 | RNF141      | NM_001266485 | AIF1L       | NM_001194341 |
| FAM101A     | NM_001194211 | PID1       | NM_001265883 | TTL        | NM_001266278 | SWAP70      | NM_001172414 | C15H9orf78  | NM_001267022 |
| PIWIL1      | NM_001195711 | CAB39      | NM_001267016 | SLC20A1    | NM_001193854 | RIC3        | NM_001261177 | LRRRC8A     | NM_001257576 |
| RAN         | NM_001260776 | PSMD1      | NM_001257805 | IL1B       | NM_001042756 | OR10A6      | NM_001194102 | ZER1        | NM_001266249 |
| NOC4L       | NM_001258179 | PDE6D      | NM_001194606 | HNMT       | NM_001195823 | ORD2D3      | NM_001194381 | SPTAN1      | NM_001266024 |
| PXMP2       | NM_001261587 | COPS7B     | NM_001194616 | CXCR4      | NM_001042645 | ILK         | NM_001195713 | GLE1        | NM_001261814 |
| SOPPL       | NM_001266382 | UGT1A1     | NM_001032869 | MCM6       | NM_001260615 | OR52W1      | NM_001194213 | URM1        | NM_001266132 |
| ARHGAP15    | NM_001258096 | ASB1       | NM_001261538 | DPP10      | NM_001265998 | TRIM22      | NM_001113359 | RPL35       | NM_001265735 |
| GTDC1       | NM_001261488 | TWIST2     | NM_001193812 | INSIG2     | NM_001194781 | TRIM68      | NM_001260732 | WDR38       | NM_001193696 |
| MBD5        | NM_001266707 | OTOS       | NM_001260881 | PTPN4      | NM_001266624 | PGAP2       | NM_001194594 | ZBTB26      | NM_001261685 |
| MMADHC      | NM_001265642 | GPR35      | NM_001193858 | TSN        | NM_001266679 | PDE2A       | NM_001130826 | OR1Q1       | NM_001193814 |

Supplemental Table 1: (iii) H3K4me3-enriched genes in the Baboon SVZ Total progenitors

| Gene Name | RefSeq ID    | Gene Name   | RefSeq ID    | Gene Name  | RefSeq ID    | Gene Name | RefSeq ID    | Gene Name  | RefSeq ID    |
|-----------|--------------|-------------|--------------|------------|--------------|-----------|--------------|------------|--------------|
| TADA3     | NM_001266137 | C2H3orf58   | NM_001261041 | CDH8       | NM_001257905 | SEPT7     | NM_001258100 | TMEM170B   | NM_001261045 |
| OGG1      | NM_001260579 | PAQR9       | NM_001194535 | CDH11      | NM_001266613 | NPSR1     | NM_001032942 | PHACTR1    | NM_001260596 |
| SETD5     | NM_001265978 | TRPC1       | NM_001260937 | CKLF       | NM_001265912 | RP9       | NM_001257627 | GFOD1      | NM_001266214 |
| OXTR      | NM_001044732 | TFDP2       | NM_001261774 | PDP2       | NM_001260605 | KBTBD2    | NM_001257464 | CD83       | NM_001261335 |
| CAV3      | NM_001194078 | ATP1B3      | NM_001261524 | CBFB       | NM_001266558 | LSM5      | NM_001257816 | MYLIP      | NM_001261795 |
| EDEM1     | NM_001265750 | RBP2        | NM_001194599 | E2F4       | NM_001257692 | INMT      | NM_001266113 | FAM8A1     | NM_001258124 |
| BHLHE40   | NM_001257518 | FAIM        | NM_001266110 | PARD6A     | NM_001266564 | GGCT      | NM_001266969 | RNF144B    | NM_001265699 |
| LRRN1     | NM_001194133 | ARMC8       | NM_001261014 | GFOD2      | NM_001260710 | FKBP14    | NM_001266094 | ID4        | NM_001265656 |
| CRBN      | NM_001195647 | DBR1        | NM_001266043 | RANBP10    | NM_001266835 | CHN2      | NM_001261577 | PRL        | NM_001047128 |
| EBLN2     | NM_001265951 | IL20RB      | NM_001194658 | PSKH1      | NM_001265966 | TAX1BP1   | NM_001266932 | ACOT13     | NM_001171950 |
| GXYLT2    | NM_001193691 | TMEM22      | NM_001260796 | DPEP3      | NM_001194056 | CBX3      | NM_001193607 | GMNN       | NM_001258199 |
| FOXP1     | NM_001266321 | MSL2        | NM_001266958 | PLA2G15    | NM_001265818 | NPVF      | NM_001130827 | HIST1H3D   | NM_001193714 |
| MITF      | NM_001266857 | ANAPC13     | NM_001190866 | CYB5B      | NM_001194167 | NUPL2     | NM_001266179 | HIST1H2AE  | NM_001193724 |
| ARL6IP5   | NM_001257759 | TMEM108     | NM_001265634 | NOB1       | NM_001258197 | KLHL7     | NM_001260642 | HFE        | NM_001260576 |
| UBA3      | NM_001265961 | NUDT16      | NM_001260890 | DHX38      | NM_001257881 | FAM126A   | NM_001266156 | HIST1H2AC  | NM_001193778 |
| SUCLG2    | NM_001261121 | ATP2C1      | NM_001266023 | HP         | NM_001260775 | SP4       | NM_001266828 | HIST1H2AD  | NM_001193793 |
| SLC25A26  | NM_001261056 | METTL6      | NM_001266134 | FTSJ1      | NM_001261079 | TMEM196   | NM_001194223 | HIST1H1D   | NM_001193819 |
| FHIT      | NM_001257821 | ZCSSL2      | NM_001260520 | IL34       | NM_001194359 | FERD3L    | NM_001194245 | HIST1H2BH  | NM_001193825 |
| FAM107A   | NM_001257546 | OXNAD1      | NM_001265832 | ST3GAL2    | NM_001266341 | AGR2      | NM_001194304 | ZNF322A    | NM_001265932 |
| SLMAP     | NM_001261125 | TBC1D5      | NM_001258153 | CLEC18A    | NM_001194394 | ANKMY2    | NM_001257747 | HIST1H2BJ  | NM_001193949 |
| ARF4      | NM_001195582 | SATB1       | NM_001265648 | TMEM231    | NM_001258202 | SOSTDC1   | NM_001194311 | HIST1H2BK  | NM_001260530 |
| PDE12     | NM_001258194 | RAB5A       | NM_001261148 | ADAT1      | NM_001194845 | ARL4A     | NM_001172161 | HIST1H2BM  | NM_001194045 |
| CHDH      | NM_001257809 | UBE2E2      | NM_001193865 | NUDT7      | NM_001194315 | TMEM106B  | NM_001193700 | HIST1H2BO  | NM_001193884 |
| SPCS1     | NM_001193749 | TOP2B       | NM_001265701 | SDR42E1    | NM_001194527 | NDUFA4    | NM_001035524 | GPX6       | NM_001159358 |
| GLT8D1    | NM_001266211 | LRRC3B      | NM_001193981 | MPHOSPH6   | NM_001193603 | ICA1      | NM_001265706 | GPX5       | NM_001159302 |
| PHF7      | NM_001258069 | CMC1        | NM_001261273 | COTL1      | NM_001261155 | RPA3      | NM_001266105 | TRIM27     | NM_001260792 |
| BAP1      | NM_001261378 | AZ12        | NM_001266975 | KIAA0513   | NM_001194581 | MIOS      | NM_001257861 | OR14J1     | NM_001194203 |
| WDR82     | NM_001261101 | TGFB2       | NM_001261151 | FOXC2      | NM_001198708 | TAC1      | NM_001257461 | MAMU-A     | NM_001048246 |
| PCBP4     | NM_001260867 | CMTM7       | NM_001260694 | FBXO31     | NM_001258079 | SHFM1     | NM_001266805 | MAMU-A3    | NM_001171838 |
| TEX264    | NM_001266193 | CMTM6       | NM_001266122 | DPEP1      | NM_001260742 | DNC1I     | NM_001261582 | ZNRD1      | NM_001114945 |
| RBM15B    | NM_001265669 | UBP1        | NM_001266788 | GAS8       | NM_001257569 | COL1A2    | NM_001266337 | RPP21      | NM_001047138 |
| CYB561D2  | NM_001194850 | E1F4A2      | NM_001195661 | PRMT2      | NM_001265880 | BET1      | NM_001260728 | GNL1       | NM_001047139 |
| CAMKV     | NM_001261530 | ST6GAL1     | NM_001258080 | YBEY       | NM_001265798 | GNG11     | NM_001266194 | MRPS18B    | NM_001105165 |
| IP6K1     | NM_001257763 | CLDN1       | NM_001193969 | KRTAP12-4  | NM_001194238 | CDK6      | NM_001261307 | C4H6orf136 | NM_001105163 |
| GMPPB     | NM_001265981 | IL1RAP      | NM_001032960 | LRRC3      | NM_001194240 | FAM133B   | NM_001261033 | FLOT1      | NM_001105168 |
| APEH      | NM_001261735 | PYDC2       | NM_001193432 | PKNOX1     | NM_001261289 | KRIT1     | NM_001261769 | DDR1       | NM_001114952 |
| LAMB2     | NM_001194468 | FGF12       | NM_001194006 | MX2        | NM_001079696 | CLDN12    | NM_001194860 | TCF19      | NM_001114951 |
| NCKIPSD   | NM_001257711 | MB21D2      | NM_001194011 | LCA5L      | NM_001194409 | ABCB1     | NM_001032887 | POU5F1     | NM_001114955 |
| TMEM89    | NM_001194540 | FAM43A      | NM_001194070 | DYRK1A     | NM_001258143 | DMTF1     | NM_001266901 | MAMU-I     | NM_001079671 |
| CCDC72    | NM_001193367 | NCBP2       | NM_001265847 | CLDN14     | NM_001193733 | KIAA1324L | NM_001194030 | MAMU-B     | NM_001048245 |
| ELP6      | NM_001194851 | TM4SF19     | NM_001194166 | CBR3       | NM_001193746 | SEMA3C    | NM_001260533 | MICB       | NM_001114956 |
| CCR5      | NM_001042773 | ITFG3       | NM_001266354 | SETD4      | NM_001266274 | PHTF2     | NM_001258132 | CD9        | NM_001114965 |
| SACM1L    | NM_001194852 | NDUFB10     | NM_001204758 | TMEM50B    | NM_001266579 | RSBN1L    | NM_001257886 | LY6G6C     | NM_001194576 |
| ZNF501    | NM_001194298 | NUPF        | NM_001204349 | IFNAR1     | NM_001266513 | DNAJC2    | NM_001260798 | LSM2       | NM_001260685 |
| SNRK      | NM_001257661 | E4F1        | NM_001265697 | C3H21orf59 | NM_001194041 | ORC5      | NM_001261088 | NEU1       | NM_001266298 |
| SEC22C    | NM_001194677 | TBC1D24     | NM_001257565 | SOD1       | NM_001032804 | SRPK2     | NM_001257472 | DOM3Z      | NM_001266982 |
| LYZL4     | NM_001194683 | FLYWCH2     | NM_001190858 | KRTAP8-1   | NM_001193918 | RINT1     | NM_001257819 | PRRT1      | NM_001257967 |
| ENTPD3    | NM_001266748 | OR1F1       | NM_001193913 | CCT8       | NM_001261501 | HBP1      | NM_001261020 | RNF5       | NM_001205116 |
| MOBP      | NM_001190966 | ZNF200      | NM_001261221 | USP16      | NM_001260999 | CBLL1     | NM_001260727 | MAMU-DRB1  | NM_001044261 |
| RPSA      | NM_001195480 | CREBBP      | NM_001260715 | ADAMTS1    | NM_001266264 | IMMP2L    | NM_001261314 | PSMB9      | NM_001194864 |
| MYD88     | NM_001130681 | NMRAL1      | NM_001265685 | GABPA      | NM_001266585 | IFRD1     | NM_001261783 | MAMU-DMA   | NM_001265654 |
| TBCCD1    | NM_001266952 | ROGD1       | NM_001265992 | ATP5J      | NM_001257938 | GPR85     | NM_001266820 | MAMU-DMA   | NM_001193474 |
| TRA2B     | NM_001261336 | UBN1        | NM_001257606 | C3H21orf91 | NM_001194344 | CTTNBP2   | NM_001168625 | SLC39A7    | NM_001261144 |
| TMEM41A   | NM_001257828 | FAM86A      | NM_001194839 | BTG3       | NM_001266041 | NAA38     | NM_001266597 | RPS10      | NM_001193579 |
| EHHADH    | NM_001257492 | TMEM114     | NM_001194176 | HSPA13     | NM_001193708 | KCND2     | NM_001261699 | TAF11      | NM_001261556 |
| C2H3orf70 | NM_001193899 | METTL22     | NM_001194202 | ABCC13     | NM_001032930 | FAM3C     | NM_001266245 | STK38      | NM_001260590 |
| CAMK2N2   | NM_001193366 | ZC3H7A      | NM_001257840 | FAM20C     | NM_001193713 | NDUFA5    | NM_001198685 | C4H6orf89  | NM_001258161 |
| AP2M1     | NM_001260598 | BFAR        | NM_001260924 | COX19      | NM_001257834 | GPR37     | NM_001257869 | FTSJD2     | NM_001257787 |
| EIF2B5    | NM_001266121 | RRN3        | NM_001257664 | PAPOLB     | NM_001194858 | GCC1      | NM_001265763 | CCDC167    | NM_001261613 |
| ABCC5     | NM_001260653 | C20H16orf45 | NM_001194421 | ACTB       | NM_001033084 | CALU      | NM_001260801 | GLO1       | NM_001261764 |
| KLHL24    | NM_001260584 | TMC7        | NM_001257826 | KDELRL2    | NM_001260765 | TNPO3     | NM_001266048 | TREML1     | NM_001194729 |
| DNAJC19   | NM_001266267 | GDE1        | NM_001260575 | ZDHHC4     | NM_001261639 | UBE2H     | NM_001261059 | CCND3      | NM_001265987 |
| USP13     | NM_001265638 | THUMPD1     | NM_001265929 | BRI3       | NM_001266634 | MEST      | NM_001260942 | RPL7L1     | NM_001193633 |
| NDUFB5    | NM_001266533 | UQCRC2      | NM_001261133 | PDAP1      | NM_001266283 | MKLN1     | NM_001260802 | XPO5       | NM_001266942 |
| GNB4      | NM_001261165 | CDR2        | NM_001260929 | CPSF4      | NM_001257618 | BPGM      | NM_001266072 | GTPBP2     | NM_001266862 |
| MFN1      | NM_001266266 | UBFD1       | NM_001266120 | FAM200A    | NM_001194538 | MTPN      | NM_001260744 | MAD2L1BP   | NM_001265944 |
| ZMAT3     | NM_001194853 | CACNG3      | NM_001261544 | AZGP1      | NM_001194114 | TRIM24    | NM_001260835 | MRPS18A    | NM_001257635 |
| NLGN1     | NM_001257734 | LCMT1       | NM_001260979 | ZKSCAN1    | NM_001194124 | C3H7orf55 | NM_001194423 | CDCSL      | NM_001261272 |
| TNFSF10   | NM_001266034 | C20H16orf82 | NM_001145761 | FIS1       | NM_001266401 | MRPS33    | NM_001266016 | SUPT3H     | NM_001266569 |
| TNIK      | NM_001261217 | TUFM        | NM_001266084 | RABL5      | NM_001194410 | AGK       | NM_001260561 | ENPP4      | NM_001266236 |
| EIF5A2    | NM_001260939 | C20H16orf54 | NM_001194257 | BAZ1B      | NM_001261643 | PRSS37    | NM_001194861 | CD2AP      | NM_001266309 |
| CLDN11    | NM_001260553 | PAGR1       | NM_001194289 | GATSL2     | NM_001266104 | TAS2R39   | NM_001080763 | MUT        | NM_001261561 |
| GPR160    | NM_001193759 | CDIPT       | NM_001260643 | WBSR17     | NM_001265889 | FAM115C   | NM_001193948 | GLYATL3    | NM_001194067 |
| SEC2E     | NM_001195502 | TMEM219     | NM_001260842 | TMEM248    | NM_001193777 | OR2A2     | NM_001193978 | CRISP1     | NM_001032811 |
| PDCD10    | NM_001266410 | INO80E      | NM_001194364 | TPST1      | NM_001257885 | C3H7orf33 | NM_001194007 | IL17F      | NM_001261287 |
| SPTSSB    | NM_001193354 | CD2BP2      | NM_001260696 | VKORC1L1   | NM_001266931 | EZH2      | NM_001266503 | FBXO9      | NM_001160298 |
| B3GALNT1  | NM_001266280 | SEPHS2      | NM_001159420 | CHCHD2     | NM_001198739 | ZNF862    | NM_001266842 | LRRC1      | NM_001266506 |
| SMC4      | NM_001261676 | RNF40       | NM_001194214 | MRPS17     | NM_001266196 | GIMAP4    | NM_001257713 | FAM83B     | NM_001194454 |
| IL12A     | NM_001044734 | ORAI3       | NM_001194521 | VSTM2A     | NM_001193935 | CDK5      | NM_001266418 | PRIM2      | NM_001266600 |
| SCHIP1    | NM_001265718 | BCKDK       | NM_001257638 | GRB10      | NM_001257428 | CHPF2     | NM_001244592 | LMBRD1     | NM_001194516 |
| LXN       | NM_001266988 | C20H16orf58 | NM_001194596 | IGFBP3     | NM_001260547 | RHEB      | NM_001261182 | C4H6orf57  | NM_001194396 |
| GFM1      | NM_001261690 | ORC6L       | NM_001194605 | RAMP3      | NM_001257448 | ACTR3B    | NM_001266189 | KHDC1      | NM_001257908 |
| MLF1      | NM_001261200 | PHKB        | NM_001261044 | LOC705636  | NM_001261009 | HTR5A     | NM_001195824 | EEF1A1     | NM_001195750 |
| SSR3      | NM_001266544 | CBLN1       | NM_001193684 | PPIA       | NM_001032809 | DNAJB6    | NM_001257911 | TMEM30A    | NM_001260817 |
| KCNAB1    | NM_001260716 | SNX20       | NM_001261262 | TMED4      | NM_001266681 | NCAPG2    | NM_001258148 | MYO6       | NM_00104536  |
| GMPS      | NM_001261203 | RPGRIP1L    | NM_001257423 | NUDCD3     | NM_001266593 | DUSP22    | NM_001260542 | IRAK1BP1   | NM_001194610 |
| MME       | NM_001260814 | CES5A       | NM_001168494 | YKT6       | NM_001266540 | EXOC2     | NM_001266944 | LCA5       | NM_001266344 |
| RAP2B     | NM_001194854 | MT3         | NM_001266138 | COA1       | NM_001265636 | PSMG4     | NM_001261808 | ELOVL4     | NM_001040419 |
| P2RY1     | NM_001261723 | MT1E        | NM_001195830 | PSMA2      | NM_001266881 | FAM50B    | NM_001267791 | TPBG       | NM_001193701 |
| COMMD2    | NM_001194418 | ARL2BP      | NM_001267028 | C7orf36    | NM_001194130 | NRN1      | NM_001194743 | PRSS35     | NM_001048244 |
| TM4SF18   | NM_001261318 | GINS3       | NM_001260655 | STARSD3NL  | NM_001266168 | SLC35B3   | NM_001257835 | CYB5R4     | NM_001193767 |
| PLSCR4    | NM_001266547 | SLC38A7     | NM_001260850 | ELMO1      | NM_001257647 | C4H6orf52 | NM_001193881 | MRAP2      | NM_001261086 |

Supplemental Table 1: (iii) H3K4me3-enriched genes in the Baboon SVZ Total progenitors

| Gene Name   | RefSeq ID    | Gene Name    | RefSeq ID    | Gene Name    | RefSeq ID    | Gene Name | RefSeq ID    | Gene Name | RefSeq ID    |
|-------------|--------------|--------------|--------------|--------------|--------------|-----------|--------------|-----------|--------------|
| RPL10L      | NM_001194068 | MAK16        | NM_001260675 | KIN          | NM_001261813 | SMNDC1    | NM_001266756 | CLN8      | NM_001194050 |
| RPS29       | NM_001267537 | RNF122       | NM_001266064 | OPTN         | NM_001032897 | PDCD4     | NM_001257846 | AGPAT5    | NM_001257833 |
| SAV1        | NM_001261241 | DUSP26       | NM_001257818 | PRPF18       | NM_001260784 | GPAM      | NM_001266771 | MNP1A     | NM_001032862 |
| ERO1L       | NM_001266764 | ERLIN2       | NM_001257541 | CDNF         | NM_001193826 | TRUB1     | NM_001266998 | SPAG11B   | NM_001037282 |
| GNPNAT1     | NM_001260696 | TM2D2        | NM_001260764 | DCLRE1C      | NM_001204350 | CCDC172   | NM_001193986 | DEFB2L    | NM_001128851 |
| FERMT2      | NM_001266319 | IDO1         | NM_001077483 | FAM188A      | NM_001193862 | CACUL1    | NM_001266943 | LOC574310 | NM_001032922 |
| CGRRF1      | NM_001266210 | GOLGA7       | NM_001194104 | C1QL3        | NM_001265799 | BAG3      | NM_001266507 | MNP2      | NM_001032863 |
| FBXO34      | NM_001266246 | GINS4        | NM_001261222 | PTPLA        | NM_001193912 | MCMBP     | NM_001257663 | ROAD2     | NM_001131060 |
| OTX2        | NM_001177645 | POLB         | NM_001257703 | CACNB2       | NM_001257782 | WDR11     | NM_001266829 | CTSB      | NM_001194899 |
| MUDENG      | NM_001194895 | SLC20A2      | NM_001266611 | ARL5B        | NM_001193479 | HTRA1     | NM_001258176 | TNKS      | NM_001261281 |
| PSMA3       | NM_001260896 | THAP1        | NM_001257879 | DNAJC1       | NM_001261677 | OAT       | NM_001266478 | TUSC3     | NM_001266279 |
| DAAM1       | NM_001257504 | MCM4         | NM_001266203 | COMMD3       | NM_001195447 | FAM53B    | NM_001193710 | CNOT7     | NM_001266847 |
| JKAMP       | NM_001260993 | UBE2V2       | NM_001266843 | RAB18        | NM_001266790 | BCCIP     | NM_001265671 | NAT2      | NM_001044736 |
| DHRS7       | NM_001260168 | SNAI2        | NM_001260982 | ARHGAP12     | NM_001260799 | MGMT      | NM_001257605 | INTS10    | NM_001266582 |
| MNAT1       | NM_001261796 | LOC100499551 | NM_001195073 | NRP1         | NM_001265816 | NKX6-2    | NM_001266630 | FGF17     | NM_001194186 |
| TRMT5       | NM_001261618 | PCMTD1       | NM_001260718 | CUL2         | NM_001257552 | SPRN      | NM_001194653 | KIAA1967  | NM_001194900 |
| SNAPC1      | NM_001257672 | FAM150A      | NM_001194437 | LOC100499557 | NM_001195085 | CYP2E1    | NM_001040213 | PEBP4     | NM_001190951 |
| RHOJ        | NM_001260613 | RB1CC1       | NM_001266144 | CSGALNACT2   | NM_001172170 | APOBEC3A  | NM_001246231 | NEFL      | NM_001265845 |
| PPP2R5E     | NM_001266743 | TCEA1        | NM_001260708 | ZNF32        | NM_001260922 | MAMU-AG   | NM_001134230 | BNIP3L    | NM_001037284 |
| ESR2        | NM_001265821 | RPS20        | NM_001257253 | CXCL12       | NM_001032934 | MRPL41    | NM_001258134 | PNMA2     | NM_001257697 |
| ZBTB25      | NM_001194209 | UBXN2B       | NM_001261602 | ZNF22        | NM_001261786 | MAMU-B18  | NM_001114964 | ADRA1A    | NM_001114733 |
| GPX2        | NM_001115137 | TOX          | NM_001261489 | OR13A1       | NM_001194549 | PRKX      | NM_001258204 | TRIM35    | NM_001257556 |
| FNTB        | NM_001257705 | RAB2A        | NM_001193860 | TIMM23       | NM_001190973 | NLGN4Y    | NM_001145058 | CCDC25    | NM_001266572 |
| GPHN        | NM_001257815 | CLVS1        | NM_001265738 | OGDHL        | NM_001265802 | PNPLA4    | NM_001193844 | FZD3      | NM_001261141 |
| TMEM229B    | NM_001194355 | GGH          | NM_001260712 | SNCG         | NM_001266560 | AMELX     | NM_001098513 | LEPROTL1  | NM_001266983 |
| VT1B        | NM_001266359 | ARMC1        | NM_001261315 | GRID1        | NM_001257667 | TMSB4X    | NM_001260557 | XPNPEP1   | NM_001266962 |
| RDH11       | NM_001257659 | PDE7A        | NM_001266863 | GHITM        | NM_001266702 | RAB9A     | NM_001194908 | ENY2      | NM_001265903 |
| RDH12       | NM_001194401 | C8H8orf46    | NM_001194901 | TMEM254      | NM_001266368 | GLRA2     | NM_001266926 | SYBU      | NM_001265668 |
| ERH         | NM_001260564 | VCIPI1       | NM_001260931 | SFTPA1       | NM_001195376 | TMEM27    | NM_001194195 | UTP23     | NM_001193908 |
| SLC39A9     | NM_001194438 | COPS5        | NM_001260680 | PIPF         | NM_001266124 | AP1S2     | NM_001194910 | EXT1      | NM_001258133 |
| KIAA0247    | NM_001194447 | ARFGEF1      | NM_001261046 | RPS24        | NM_001261027 | RBBP7     | NM_001261191 | TAF2      | NM_001266380 |
| SYNJ2BP     | NM_001260960 | TRAM1        | NM_001266375 | KCNMA1       | NM_001032810 | SCML1     | NM_001114112 | MRPL13    | NM_001258083 |
| ADAM21      | NM_001194322 | RPL7         | NM_001193556 | VDAC2        | NM_001257424 | SCML2     | NM_001261359 | DERL1     | NM_001257937 |
| PNMA1       | NM_001257567 | UBE2W        | NM_001266510 | ADK          | NM_001266651 | RS1       | NM_001194911 | WDYHV1    | NM_001265979 |
| ELMSAN1     | NM_001257926 | TMEM70       | NM_001266511 | CHCHD1       | NM_001258084 | EIF1AX    | NM_001261777 | FBXO32    | NM_001257729 |
| VRTN        | NM_001194898 | PI15         | NM_001193804 | ANXA7        | NM_001260935 | DCAF8L2   | NM_001266964 | RNF139    | NM_001261771 |
| FCF1        | NM_001261542 | PKIA         | NM_001193422 | MRPS16       | NM_001257904 | MAGEB10   | NM_001193982 | TRIB1     | NM_001193695 |
| DLST        | NM_001260749 | STMN2        | NM_001265775 | ECD          | NM_001261188 | FTHL17    | NM_001194051 | MYC       | NM_001142873 |
| MLH3        | NM_001257783 | MRPS28       | NM_001261089 | DDIT4        | NM_001257796 | PRRG1     | NM_001261082 | FAM49B    | NM_001261694 |
| NEK9        | NM_001265631 | FABP12       | NM_001194902 | C9H10orf54   | NM_001190878 | GPR34     | NM_001266567 | ST3GAL1   | NM_001261634 |
| AHSA1       | NM_001266884 | CHMP4C       | NM_001193985 | PCBD1        | NM_001266886 | DUSP21    | NM_001265675 | PTPA3     | NM_001193694 |
| ADCK1       | NM_001266902 | RALYL        | NM_001201567 | LRRC20       | NM_001194412 | SERPINB6  | NM_001202551 | GIHPB1    | NM_001266526 |
| DIO2        | NM_001159294 | C8H8orf59    | NM_001257266 | H2AFY2       | NM_001266414 | FOXP3     | NM_001032918 | TSTA3     | NM_001261649 |
| TSHR        | NM_001195395 | CA2          | NM_001195417 | DDX50        | NM_001258182 | MAGED4B   | NM_001266405 | EXOSC4    | NM_001261104 |
| GTF2A1      | NM_001257710 | DCAF4L2      | NM_001198702 | CCAR1        | NM_001260782 | XAGE5     | NM_001193739 | GPA1      | NM_001266834 |
| FLRT2       | NM_001266473 | NBN          | NM_001265739 | HNRNPH3      | NM_001266749 | FAM156A   | NM_001193751 | ZNF7      | NM_001266571 |
| KCNK10      | NM_001261558 | LOC696190    | NM_001261304 | DEK          | NM_001257528 | GPR173    | NM_001257596 | ZNF250    | NM_001267795 |
| ZC3H14      | NM_001266592 | LRRC69       | NM_001193750 | LRRMT3       | NM_001266575 | HUWE1     | NM_001266752 | ZMYND11   | NM_001261102 |
| TDP1        | NM_001257779 | FAM92A1      | NM_001265930 | EGR2         | NM_001258086 | APEX2     | NM_001261365 | LARP4B    | NM_001260689 |
| NRDE2       | NM_001193888 | KIAA1429     | NM_001193848 | ZNF365       | NM_001257568 | MAGEH1    | NM_001260625 | WDR37     | NM_001260851 |
| CPSF2       | NM_001257580 | TP53INP1     | NM_001266580 | C9H10orf107  | NM_001194905 | SPIN3     | NM_001260981 | AKR1E2    | NM_001194235 |
| GOLGA5      | NM_001257502 | SDC2         | NM_001260964 | CDK1         | NM_001261470 | ZC4H2     | NM_001261736 | MXI1      | NM_001261031 |
| IFI27       | NM_001048169 | MTDH         | NM_001266369 | UBE2D1       | NM_001257863 | EDA2R     | NM_001193467 | FRA10AC1  | NM_001266720 |
| GSKIP       | NM_001194191 | COX6C        | NM_001193384 | CISD1        | NM_001257590 | NONO      | NM_001194913 | LGI1      | NM_001261057 |
| PAPOLA      | NM_001265897 | ANKRD46      | NM_001266498 | MBL2         | NM_001105535 | CXCR3     | NM_001145040 | CYP2C18   | NM_001194066 |
| C7H14orf177 | NM_001194226 | PABPC1       | NM_001257897 | CSTF2T       | NM_001266798 | PHKA1     | NM_001261198 | CYP2C75   | NM_001040211 |
| SETD3       | NM_001260871 | YWHAZ        | NM_001260899 | SGMS1        | NM_001257652 | RLIM      | NM_001266839 | CYP2C76   | NM_001177788 |
| DIO3        | NM_001122649 | NCALD        | NM_001257764 | PAPSS2       | NM_001266008 | UPRT      | NM_001261749 | DNTT      | NM_001266694 |
| WDR20       | NM_001266073 | AZIN1        | NM_001260734 | ATAD1        | NM_001257770 | PGK1      | NM_001195658 | AVP1      | NM_001266977 |
| CINP        | NM_001266052 | SLC25A32     | NM_001266738 | PTEN         | NM_001260965 | TGIF2LX   | NM_001032888 | SLC25A28  | NM_001265757 |
| TRMT61A     | NM_001257540 | LRP12        | NM_001261683 | FAS          | NM_001032933 | PABPC5    | NM_001044728 | ABCC2     | NM_001032847 |
| SIVA1       | NM_001261325 | ANGPT1       | NM_001266116 | IFIT2        | NM_001261730 | NAP1L3    | NM_001265658 | ERLIN1    | NM_001194366 |
| C7H14orf79  | NM_001193779 | EIF3E        | NM_001258088 | PPP1R3C      | NM_001257737 | PCDH19    | NM_001265688 | CWF19L1   | NM_001266734 |
| CRIP1       | NM_001266846 | EMC2         | NM_001257604 | IDE          | NM_001258074 | DRP2      | NM_001266215 | BLOC1S2   | NM_001266915 |
| ZNF596      | NM_001266814 | TMEM74       | NM_001193905 | CYP26A1      | NM_001193915 | H2BFWT    | NM_001193918 | NDUF8     | NM_001265766 |
| CXHorf57    | NM_001193976 | FAM127A      | NM_001194127 | CETN2        | NM_001195814 | WBP1L     | NM_001194587 | LBX1      | NM_001194466 |
| PLS3        | NM_001266221 | CXHorf48     | NM_001194153 | SLC6A8       | NM_001266276 | PCGF6     | NM_001194611 | POLL      | NM_001266906 |
| WDR44       | NM_001266328 | DDX26B       | NM_001265682 | G6PD         | NM_001266470 | USMG5     | NM_001265824 | FBXW4     | NM_001257946 |
| C1GALT1C1   | NM_001260840 | ARHGFEF6     | NM_001266573 | DKC1         | NM_001260994 | GSTO1     | NM_001260555 | KCNIP2    | NM_001194520 |
| THOC2       | NM_001260621 | SOX3         | NM_001193752 | GTF2E2       | NM_001260927 | PRKCG     | NM_001261312 | LDB1      | NM_001266417 |
| CXHorf64    | NM_001193842 | LDOC1        | NM_001260647 | PTP2CB       | NM_001260748 | TRIM8     | NM_001266728 | CUEDC2    | NM_001257660 |
| RAP2C       | NM_001194044 | MAGEC2       | NM_001265825 | RBM17        | NM_001257732 | MTM1      | NM_001261718 | ACTR1A    | NM_001257775 |
| GPC4        | NM_001265741 | SPANXN       | NM_001032954 | MOSPD1       | NM_001261620 |           |              |           |              |

**Supplemental Table 1: (iv.) H3K4me3-enriched genes in the Baboon SVZ overlap comparison between NSC and NB populations**

| NSC-specific Genes (2160) |           |              |             |             |            |             |             |             |             |             |           |
|---------------------------|-----------|--------------|-------------|-------------|------------|-------------|-------------|-------------|-------------|-------------|-----------|
| ADD1                      | RWDD3     | ACBD6        | GNAZ        | LSM3        | IDH1       | EIF5B       | BIRC2       | RCL1        | EZH1        | TXNL1       | ZSCAN1    |
| MAEA                      | DBT       | TOR1AIP2     | GUCD1       | MRPS25      | IKZF2      | CHST10      | DDI1        | SLC1A1      | BECN1       | LMAN1       | ZBTB45    |
| ITLL10                    | EXTL2     | NUF2         | CRYBA4      | GP9         | MREG       | CREG2       | KIAA1826    | CBWD1       | HEXIM2      | PMAP1       | CHMP2A    |
| GLTPD1                    | SLC30A7   | RXRG         | PITPNB      | RPN1        | RPL37A     | IL1R2       | AASDHPPT    | PTAR1       | CRHR1       | KDSR        | CHMP2B    |
| MRPL20                    | OLFM3     | MGST3        | GAL3ST1     | RUVBL1      | CXCR1      | TMEM182     | ELMOD1      | CYP1D1      | METTL2A     | SERPINB10   | POU1F1    |
| GNB1                      | PRMT6     | UCK2         | DUSP18      | TPRA1       | ARPC2      | MPEP9       | C14H11orf65 | RORB        | CYB561      | TMX3        | CGGBP1    |
| RER1                      | SLC25A24  | MAEL         | SELM        | C11H12orf29 | TMBIM1     | C13H2orf49  | C14H11orf87 | NMRK1       | FTSJ3       | DOCK6       | PROS1     |
| RPL22                     | HENMT1    | CD247        | YWHAH       | DUSP6       | CTDSP1     | TTL         | C14H11orf1  | GNA14       | DDX5        | CD226       | ARL6      |
| VAMP3                     | PSRC1     | SFT2D2       | TIMP3       | GNLNT4      | CRYBA2     | IL1B        | HSPB2       | TLE1        | PRKCA       | NETO1       | MINA      |
| RERE                      | PSMA5     | XCL1         | LARGE       | POC1B       | DNAJB2     | CXCR4       | C14H11orf57 | GKAP1       | PSMD12      | C18orf55    | GPR15     |
| SPSB1                     | GSTM3     | SLC19A2      | TOM1        | BTG1        | DES        | MCM6        | TEX12       | DAPK1       | C16H17orf58 | RNF126      | CMSS1     |
| CTNBP1                    | AHCYL1    | METTL18      | TST         | CRADD       | CHPF       | DPP10       | PTS         | CDK20       | MAP2K6      | GPX4        | TMEM45A   |
| TNFRSF1B                  | KCNA2     | FMO2         | CSNK1E      | PLXNC1      | INHA       | C1QL2       | ZBTB16      | SHC3        | KCNJ2       | ATP5D       | FAM55C    |
| DHR33                     | KCNA3     | PIGC         | DNAL4       | NDUFA12     | EPHA4      | C13H2orf76  | REXO2       | CKS2        | SOX9        | CIRBP       | ALCAM     |
| ZBTB17                    | LRIF1     | FASLG        | SMCR7L      | VEZT        | CUL3       | TMEM177     | BACE1       | GADD45G     | COG1        | GAMT        | CD47      |
| NECAP2                    | DENND2D   | CENPL        | FAM109B     | METAP2      | TM4SF20    | PTPN4       | FXYD6       | NAIF1       | CDC42EP4    | UQCR        | IFT57     |
| IGSF21                    | WDR77     | SERPINC1     | LDLOC1L     | ELK3        | CCL20      | RALB        | SCN2B       | FAM102A     | RAB37       | FAM108A1    | ABHD10    |
| EMC1                      | CTTNBP2NL | CACYBP       | NUP50       | CDK17       | PID1       | ERC3        | ARC1        | SYK         | SLC9A3R1    | SLC39A3     | CD200     |
| ALPL                      | SLC16A1   | LOC100423509 | ATXN10      | FAM71C      | CAB39      | POLR2D      | DPAGT1      | AUH         | CDR2L       | S1PR4       | ATP6V1A   |
| CELA3B                    | OLFML3    | TNR          | PPARA       | DRAM1       | EIF4E2     | FAM168B     | USP2        | NFIL3       | HN1         | EEF2        | QTRT1D    |
| KDM1A                     | SIKE1     | RFWD2        | CDPF1       | IGF1        | EFHD1      | CD151       | THY1        | CENPP       | MRPS7       | TNFIP8L1    | IGSF11    |
| ZNF436                    | ATP1A1    | ZNF692       | CERK        | CHST11      | ATG16L1    | CHID1       | TBCEL       | BICD2       | KIAA0195    | KDM4B       | B4GALT4   |
| GALE                      | CD58      | SH3BP5L      | ZBED4       | C11H12orf45 | UGT1A1     | TOLLIP      | UBASH3B     | NINJ1       | ACOX1       | SLC25A23    | TMEM39A   |
| RHCE                      | CD2       | NLRP3        | FAM116B     | TCP11L2     | SH3BP4     | CTSD        | SCN3B       | HIATL1      | SEC14L1     | CRB3        | ADPRH     |
| TMEM57                    | TRIM45    | SMYD3        | ADM2        | C11H12orf23 | AGAP1      | MRPL23      | OR4D5       | FBP1        | TNRC6C      | MCOLN1      | FSTL1     |
| ZNF593                    | WDR3      | ADSS         | SLC6A12     | CRY1        | CXCR7      | CD81        | ESAM        | INPP5K      | SOC53       | CD209       | RABL3     |
| CD52                      | ACP6      | LGALS8       | FBXL14      | PRDM4       | ASB1       | TSSC4       | ST3GAL4     | CYB5D2      | TBC1D16     | RAB11B      | EAF2      |
| SFN                       | GNAQ      | RBM34        | LRTM2       | ISCU        | TWIST2     | CTTN        | BARX2       | MED11       | NPTX1       | ACTL9       | CSTA      |
| GNP2                      | FCGR1     | KIAA1804     | FKBP4       | ALKBH2      | OTOS       | ORAOV1      | TMEM45B     | PSMB6       | C16H17orf70 | OR1M1       | SEC22A    |
| TRNP1                     | CA14      | NTPCR        | PARP11      | FAM222A     | GPR35      | SUV420H1    | ZMYND19     | SLC25A11    | SIRT7       | OR7D4       | PTPLB     |
| FGR                       | LASS2     | DISC1        | CD9         | PPTC7       | BOK        | YIF1A       | C15H9orf142 | RPAIN1      | TEX19       | ZNF177      | ITGB5     |
| EYA3                      | POGZ      | GNPAT        | MLF2        | PPP1CC      | DTYMK      | CCDC85B     | INPP5E      | WSCD1       | FN3KRP      | UBL5        | ROPN1B    |
| YTHDF2                    | MRPL9     | GALNT2       | C11H12orf57 | BRAP        | ING5       | FAM89B      | NACC2       | XAF1        | CRYL1       | PPAN        | SLC41A3   |
| SRSF4                     | S100A10   | CCSAP        | PHC1        | PTPN11      | RNASEH1    | FRMD8       | BRD3        | KCTD11      | ZMYM2       | P2RY11      | ALDH1L1   |
| MECR                      | SMCP      | PCMTD2       | KLRF1       | OAS1        | IAH1       | MRPL49      | VAV2        | TNFSF12     | MTMR6       | ICAM3       | CHST13    |
| SNRNP40                   | CHTOP     | GID8         | OLR1        | CCDC42B     | ODC1       | DNAJC4      | SURF4       | TMEM107     | SHISA2      | C19H19orf52 | CHCHD6    |
| KPNA6                     | CREB3L4   | LSM14B       | ETV6        | SDS         | PDIA6      | COX8A       | GTF3C4      | MFS6L       | POMP        | ACP5        | WNT7A     |
| ADC                       | RAB13     | ATP5E        | LOH12CR1    | MED13L      | KCNF1      | C14H11orf83 | TNNG2       | RCVRN       | UBL3        | C19orf56    | HDAC11    |
| SMIM12                    | SHC1      | STX16        | CREBL2      | TESC        | E2F6       | GANAB       | MED27       | TMEM220     | KATNAL1     | TNPO2       | VGLL4     |
| NCDN                      | EFNA3     | RAB22A       | HEBP1       | PRKAB1      | FAM84A     | FAD52       | AIF1L       | HS3ST3A1    | ALOX5AP     | C19H19orf43 | ATG7      |
| TRAPPC3                   | RHBG      | RBM38        | WBP11       | RNF10       | DDX1       | C14H11orf10 | METTL11A    | COX10       | RXFP2       | JUNB        | SLC6A11   |
| LSM10                     | HAPLN2    | CBLN4        | C11H12orf69 | SPPL3       | FAM49A     | C14H11orf9  | CRAT        | PMP22       | RFC3        | CALR        | SEC13     |
| MEAF6                     | MRPL24    | PFDN4        | MGP         | RNF34       | TTC32      | PRPF11      | SH3GLB2     | ZSWIM7      | MAB21L1     | STX10       | NFYB      |
| MTF1                      | PRCC      | ZFP64        | RERF        | GPR81       | C13H2orf43 | MS4A7       | LRR8C8A     | FLCN        | RFXAP       | NDUF87      | EDEM1     |
| FHL3                      | CD1D      | STAU1        | EPS8        | ABC89       | AFBLNR     | URM1        | ATPAF2      | EXOSC8      | AKAP8L      | BHLHE40     |           |
| PPT1                      | CD1B      | CSE1L        | LMO3        | RILPL2      | PTRHD1     | OR4A47      | PSMB7       | ALKBH5      | STOML3      | AP1M1       | LRRN1     |
| RIMKLA                    | ATP1A2    | MMP9         | SLCO1A2     | ZNF664      | ADCY3      | CHRM4       | LHX2        | GRAP        | LHFP        | SLC35E1     | EBLN2     |
| C1H1orf50                 | PEA15     | MYBL2        | LYRM5       | PWIL1       | DNAJC27    | PHF21A      | STRBP       | DHR57B      | ELF1        | USE1        | FOXP1     |
| SLC2A1                    | NCSTN     | IIFT52       | KRAS        | NOC4L       | KIF3C      | CHST1       | ZBTB26      | LYRM9       | C13orf15    | ABHD8       | MITF      |
| CDC20                     | F11R      | ZHX3         | RASSF8      | ARHGAP15    | EPT1       | C14H11orf74 | RBM18       | FAM222B     | C13orf31    | MRPL34      | UBA3      |
| ELOVL1                    | UHMK1     | TOP1         | SSPN        | GTDCC1      | C13H2orf70 | SLC1A2      | STOM        | CRYBA1      | GTF2F2      | INSL3       | FAM19A1   |
| ATP6V0B                   | TRIM11    | SLC32A1      | MED21       | MBD5        | C13H2orf18 | ELF5        | RAB14       | NUFIP2      | LCP1        | PIK3R2      | SLC25A26  |
| EIF2B3                    | GUK1      | ADIG         | STK38L      | RND3        | LBH        | LMO2        | TRAF1       | CORO6       | ESD         | SUGP1       | PRICKLE2  |
| HECTD3                    | PSEN2     | RPRD1B       | REP15       | CACNB4      | EHD3       | CSTF3       | TLR4        | TMIGD1      | MED4        | ZNF507      | PSMD6     |
| PRDX1                     | C1H1orf95 | C10H2orf118  | MRPS35      | RPRM        | DPY30      | QSER1       | TRIM32      | OMG         | RB1         | PDCD5       | SYNPR     |
| LURAP1                    | PYCR2     | DLGAP4       | PTHLH       | NR4A2       | FAM98A     | PAX6        | TNFSF8      | CDK5R1      | LPAR6       | KCTD15      | C2H3orf14 |
| MOB3C                     | EPHX1     | SCAND1       | GXYLT1      | GPD2        | EIF2AK2    | DNAJC24     | C15H9orf91  | ASIC2       | ARL11       | KIAA0355    | FHIT      |
| CMPK1                     | LBR       | EDEM2        | YAF2        | ACVR1C      | CCDC42EP3  | MPPED2      | POLE3       | NLE1        | ALG11       | FAM187B     | FAM107A   |
| SPATA6                    | CAPN2     | TP53INP2     | ADAMTS20    | PKP4        | CYP1B1     | ARL14E4P    | HDHD3       | RASL10B     | KLHL1       | HCST        | SLMAP     |
| ELAVL4                    | DUSP10    | KIF3B        | NELL2       | TANK        | SRSF7      | LINC7       | KIAA1958    | NFE2L1      | KLF12       | POLR2I      | PDE12     |
| FAF1                      | TGFB2     | DEFB129      | FAM113B     | B3GALT1     | MTA3       | FIBIN       | HSDL2       | HOXB8       | TBC1D4      | MED29       | SELK      |
| CDKN2C                    | KCTD3     | NRSN2        | C11H12orf68 | LASS6       | PPM1B      | GAS2        | UGCG        | ATP5F1      | UCHL3       | SUPT5H      | CHDH      |
| RNF11                     | PROX1     | CSNK2A1      | CACNB3      | BBS5        | PREPL      | MGRPRX2     | DNAJC25     | NXPH3       | KCTD12      | DYRK1B      | WDR82     |
| GPX7                      | KCNH1     | C20orf54     | CCDC65      | PHOSPHO2    | PRKCE      | LOC96844    | C15H9orf152 | SPOP        | SLITRK1     | PLD3        | RPL29     |
| DIO1                      | DIEXF     | PDYN         | COX14       | DYNC1I2     | ATP6V1E2   | RP513       | AKAP2       | NME1        | SLITRK5     | CYP2B6      | ABHD14B   |
| TMEM59                    | IRF6      | SNRNP        | ATF1        | DLX1        | C13H2orf61 | C14H11orf58 | C9orf4      | CA10        | RAP2A       | MIA         | RBM15B    |
| SSBP3                     | TRAF3IP3  | ZNF343       | C11H12orf44 | ITGA6       | EPCAM      | SPON1       | KLF4        | TOM1L1      | SLC15A1     | EGLN2       | TMEM115   |
| PCSK9                     | PFKFB2    | IDH3B        | HOXC4       | OLA1        | FOXN2      | ARNTL       | RAD23B      | HLF         | ANKRD10     | B9D2        | CYB561D2  |
| ATG4C                     | EIF2D     | GNRH2        | OR10P1      | ATP5G3      | ASB3       | DKK3        | TAL2        | MMD         | F7          | GSK3A       | TUSC2     |
| PGM1                      | AVPR1B    | FSTKD5       | CD63        | HOXD12      | SPTBN1     | RNF141      | PPP3R2      | TMEM100     | F10         | PAFAH1B3    | GNAI2     |
| JAK1                      | NUCKS1    | DDR6K1       | IL23A       | MTX2        | CCDC104    | C11orf17    | ZNF189      | NOG         | CDC16       | ZNF428      | CAMKV     |
| LEPR                      | ELK4      | C10H2orf194  | STAT2       | PRKRA       | C13H2orf74 | RPL27A      | ALG2        | SCPEP1      | ML5R        | GEMIN7      | CCDC72    |
| PDE4B                     | KLHDC8A   | SPEF1        | HSD17B6     | SESTD1      | B3GNT2     | OR10A4      | GALNT12     | AKAP1       | LDLRAD4     | OPA3        | CAMP      |
| SGIP1                     | TMCC2     | MAVS         | NAB2        | PDE1A       | EHBP1      | TAF10       | EXOSC3      | MRPS23      | CHMP1B      | SNRPD2      | CCR5      |
| GADD45A                   | CNTN2     | PRNP         | STAT6       | DUSP19      | VPS54      | HBE1        | ZBTB5       | SRSF1       | NAPG        | PP5C        | SACM1L    |
| DIRAS3                    | REN       | SLC23A1      | OS9         | NUP35       | PELL1      | OR51G2      | CCIN        | 41521       | RAB31       | AP2S1       | TMEM42    |
| LRR40                     | ETNK2     | MCM8         | AGAP2       | ZC3H15      | RAB1A      | OR52M1      | GLIPR2      | C17orf71    | NDUFV2      | EMP3        | LOC714979 |
| ZRANB2                    | ZC3H11A   | C20orf103    | CYP27B1     | ITGAV       | ACTR2      | RHOG        | RUSC2       | PTRH2       | ZFP161      | RYTH2       | ZNF501    |
| FPGT                      | BTG2      | PAK7         | CTDSP2      | ASN5D1      | SPRED2     | LRTOMT      | FANCG       | C6H5orf48   | MSCHD1      | RPL13A      | ABHD5     |
| TNNI3K                    | SYT2      | SNAP25       | USP15       | ORMDL1      | C1D        | C11orf59    | AQP3        | PPM1D       | TYMS        | IZUMO2      | SEC22C    |
| RABGGTB                   | GPR37L1   | MKKS         | C11H12orf61 | MSTN        | ARHGAP25   | PDE2A       | SMU1        | APPBP2      | RBBP8       | LRR40B      | CTNBP1    |
| ST6GALNAC3                | TIMM17A   | PCSK2        | C11H12orf66 | STAT1       | ANXA4      | FAM168A     | TMEM215     | DHR511      | SS18        | SIGLEC11    | ENTPD3    |
| PIGK                      | TNNT2     | PET117       | WIF1        | OBFC2A      | ADD2       | PGM2L1      | C15H9orf72  | AATF        | AQP4        | ZNF175      | MOBP      |
| AK5                       | CAMSAP1L1 | C10H2orf26   | CAND1       | GTF3C3      | TEX261     | OR2AT4      | MOB3B       | C16H17orf96 | NOL4        | PRPF31      | OXSR1     |
| RPF1                      | ASPM      | RALGAPA2     | DYRK2       | SF3B1       | PAIP2B     | SERPINH1    | PLAA        | RPL23       | MAPRE2      | RPS9        | MYD88     |
| C1H1orf52                 | B3GALT2   | THBD         | IFNG        | PLCL1       | RTKN       | RAB30       | CAAP1       | LASP1       | ZNF24       | NLRP7       | TBCCD1    |
| DDAH1                     | RGS1      | NXT1         | NUP107      | C2orf60     | TACR1      | PICALM      | TUSC1       | PPP1R1B     | GALNT1      | COX6B2      | C2H3orf70 |
| GTF2B                     | FAM5C     | CST11        | SLC35E3     | SPATS2L     | CTNNA2     | FZD4        | ELAVL2      | CASC3       | RPRD1A      | UBE2S       | KLHL24    |
| LRR8C                     | IVNS1ABP  | APMAP        | CNOT2       | FAM126B     | RNF181     | FOLR4       | KLHL9       | IGFBP4      | C18orf10    | ZNF581      | SOX2      |
| LRR8C8                    | EDEM3     | ABHD12       | THAP2       | NOP58       | RPIA       | PWIL4       | PTPLAD2     | CCR7        | ATP5A1      | NLRP11      | PIK3CA    |

Supplemental Table 1: (iv<sub>b</sub>) H3K4me3-enriched genes in the Baboon SVZ overlap comparison between NSC and NB populations

| NSC-specific Genes continued (2160) |             |            |            |           |            |            |            |             |             |           |             |
|-------------------------------------|-------------|------------|------------|-----------|------------|------------|------------|-------------|-------------|-----------|-------------|
| EIF5A2                              | GPR56       | TMEM106B   | NUDT3      | BRP44L    | CPNE2      | SOSTDC1    | COX5A      | DICER1      | ARL5B       | DCAF8L2   | TNFSF10     |
| SLC7A14                             | ZNF319      | ICA1       | RPL10A     | RNASET2   | TMEM144    | MZB1       | ETFA       | GLRX5       | DNAJC1      | MAGEB10   | TNIK        |
| CLDN11                              | C20H16orf80 | MIOS       | P116       | GRPEL1    | C5H4orf146 | CUTA       | TSPAN3     | VRK1        | COMMD3      | NR0B1     | FAM69A      |
| SERPIN1                             | SLC38A7     | TAC1       | CCDC167    | KIAA0232  | NPY1R      | WTAP       | CIB2       | C7H14orf177 | GAD2        | CXH2orf21 | DR1         |
| SMC4                                | CDH8        | SHFM1      | GLO1       | MRFAP1L1  | CPE        | FAM198B    | FAH        | SETD3       | NRP1        | FTHL17    | RNASEL      |
| IL12A                               | CDH11       | DNC1       | KCNK17     | JAKMIP1   | MFAP3L     | CXCC5      | MESDC1     | DIO3        | CUL2        | TMEM47    | STX6        |
| LXN                                 | CKLF        | COL1A2     | TFEB       | CYTL1     | SAP30      | IGIP       | IL16       | HSP90AA1    | CCNY        | PRRG1     | SLC6A2      |
| MLF1                                | NAE1        | CDK6       | PTCRA      | ZNF518B   | GPM6A      | PFDN1      | CPEB1      | C7H14orf79  | HNRNPF      | DYNLT3    | GNAO1       |
| KCNAB1                              | LOC696623   | KRIT1      | GTPBP2     | HS3ST1    | SPATA4     | NDUFA2     | SEC11A     | CLN8        | ZNF32       | TSPAN7    | MT3         |
| MME                                 | PSKH1       | CLDN12     | MRPS18A    | NKX3-2    | SPCS3      | PCDH45     | KLHL25     | CSGALNACT1  | CXCL12      | MID1P1    | RPAP2       |
| RAP2B                               | PSMB10      | ABCB1      | SLC29A1    | CD38      | ODZ3       | PCDH8      | NTRK3      | NUDT18      | DRGX        | ATP6AP2   | FERD3L      |
| P2RY1                               | PLA2G15     | C3H7orf23  | SUPT3H     | PROM1     | DCTD       | PCDH8B     | ABHD2      | REEP4       | C10orf72    | CASK      | AGR2        |
| P2RY12                              | NOB1        | CD36       | ENPP4      | LDB2      | CLDN24     | TAF7       | GDPGP1     | KIAA1967    | BMPR1A      | NDP       | BZW2        |
| SLAH2                               | WWP2        | TMEM60     | MUT        | LAP3      | STOX2      | KIAA0141   | RGMA       | PEBP4       | GRID1       | FUNDC1    | RGL1        |
| SELT                                | FTSJD1      | DNAJC2     | RHAG       | LCORL     | HELT       | GNPDA1     | IGF1R      | NKX3-1      | TMEM254     | ZNF673    | SLC39A7     |
| COMMD2                              | VAC14       | ORC5       | DEFB114    | DHX15     | SLC25A4    | YIPF5      | TTC23      | GNRH1       | PIIF        | CHST7     | RING1       |
| PLSCR1                              | FA2H        | SRPK2      | TRAM2      | SOD3      | PDLIM3     | KCTD16     | ASB7       | BNIP3L      | RPS24       | RGN       | TAPBP       |
| PLSCR4                              | CTRB1       | PIK3CG     | GSTA4      | ANAPC4    | CYP4V2     | RBM27      | OR4K13     | ADRA1A      | KCNMA1      | TIMP1     | KLHL22      |
| C2H3orf58                           | GABARAPL2   | PNPLA8     | FBXO9      | C5H4orf19 | SLC6A3     | JAKMIP2    | OR4K2      | TRIM35      | VDAC2       | TBC1D25   | SDF2L1      |
| CHST2                               | DYNLRB2     | DNAJB9     | GCLC       | KLF3      | MED10      | SPINK9     | PARP2      | CCDC25      | CHCHD1      | PIM2      | COMT        |
| ZBTB38                              | CDH13       | IFRD1      | LRRC1      | TLR10     | PAPD7      | PCYOX1L    | RNASE4     | PNOC        | ANAPC16     | PLP2      | OSTM1       |
| MRAS                                | HSDL1       | GPR85      | FAM83B     | WDR19     | ADCY2      | SLC6A7     | OR4E2      | GFTE2       | C9H10orf54  | FOXP3     | SOD2        |
| NCK1                                | KIAA0513    | FOXP2      | BEND6      | TMEM33    | C6H5orf49  | NDST1      | DAD1       | MAK16       | LRRC20      | HSD17B10  | ZDHH17      |
| TMEM22                              | COX4NB      | CAPZA2     | PRIM2      | ATP8A1    | SEMA5A     | MYOZ3      | MRPL52     | RNF122      | H2AFY2      | FAM104B   | PPP1R12A    |
| PCCB                                | MAP1LC3B    | ST7        | UBE2E3     | GRXCR1    | CMBL       | GPX3       | PSMB11     | DUSP26      | TSPAN15     | MAGEH1    | OSBP18      |
| MSL2                                | MVD         | ASZ1       | LMBRD1     | GABRA2    | FAM105A    | GLRA1      | SLC22A17   | FGFR1       | SRGN        | RRAGB     | NPY2R       |
| PPP2R3A                             | TRAPPC2L    | CTTNBP2    | C4H6orf57  | COMMD8    | FAM105B    | SAP30L     | JPH4       | TM2D2       | HERC4       | AR        | GLRB        |
| RAB6B                               | BDND5       | KCNQ5      | SLAIN2     | ANKH      | ITK        | PCK2       | SFRP1      | NRBF2       | OPHN1       | CREB1     | CYBB        |
| TMEM108                             | PRMT2       | FAM3C      | SLC17A5    | SCD5      | FBXL7      | CYFIP2     | TM9SF1     | GOLGA7      | ADO         | EFNB1     | CRYGC       |
| ATP2C1                              | YBEY        | RNF133     | IRAK1BP1   | HNRPDL    | ZNF622     | C5orf40    | CMA1       | IKKBK       | ZNF365      | OTUD6A    | ICOS        |
| METTL6                              | WPW2        | NDUFA5     | LCA5       | GK2       | C6H5orf22  | UBLCP1     | STXBP6     | SLC20A2     | C9H10orf107 | DLG3      | SPOCK1      |
| OXNAD1                              | TRAPPC10    | WASL       | ELOVL4     | PAQR3     | MTMR12     | TTC1       | NOVA1      | UBE2V2      | RHOBTB1     | SNX12     | MATR3       |
| TBC1D5                              | RSPH1       | GPR37      | TPBG       | CNOT6L    | TOMM40     | PTTG1      | G2E3       | EFCAB1      | CDK1        | NONO      | ACTR1B      |
| KCNH8                               | C2CD2       | GRM8       | PRSS35     | CXCL13    | RAD1       | GABRB2     | DTD2       | PCMTD1      | UBE2D1      | CXCR3     | MGAT4A      |
| NKIRAS1                             | MX2         | GCC1       | CYB5R4     | CCNI      | SLC1A3     | FAM196B    | ARHGAP5    | FAM150A     | CSTF2T      | CITED1    | SEMA4C      |
| TOP2B                               | LCA5L       | TNPO3      | SNX14      | PARM1     | TTC33      | KCNMB1     | EGLN3      | RB1CC1      | SGMS1       | PHKA1     | SEMA7A      |
| LRRC3B                              | DYRK1A      | UBE2H      | SYNCRIP    | MTHFD2L   | C6H5orf51  | FBXW11     | CFL2       | NPBWR1      | PTEN        | FGF16     | CSK         |
| CMC1                                | DISCR3      | C3H7orf45  | CNR1       | IL8       | NIM1       | UBT2D      | SRP54      | SDR16C5     | STAMBPL1    | P2RY10    | MTMR2       |
| AZ12                                | CLDN14      | TSGA14     | PNRC1      | ALB       | HMGCS1     | DUSP1      | INSM2      | IMPAD1      | FAS         | IT2A2     | JRKL        |
| CRTAP                               | SETD4       | MKLN1      | ANKRD6     | DCK       | CCL28      | SFXN1      | PAX9       | FAM110B     | PPP1R3C     | FAM46D    | SESN3       |
| ST6GAL1                             | RUNX1       | SLC35B4    | LYRM2      | IGJ       | PAIP1      | HRH2       | SLC25A21   | UBXN2B      | TNKS2       | SH3BGR1   | KIAA1409    |
| RTP4                                | ATP5O       | PTN        | SULT1B1    | PELO      | TSPAN17    | TRAPPC6B   | CYP7A1     | CYP26A1     | POU3F4      | SERPINA5  | SRPNA5      |
| BCL6                                | C3H21orf59  | TRIM24     | KLHL32     | UGT2A3    | ITGA2      | FAM193B    | C7H14orf28 | TOX         | LG1         | PCDH19    | PDCD1LG2    |
| CLDN1                               | SOD1        | C3H7orf55  | FBXL4      | STAP1     | ARL15      | AGXT2L2    | ARF6       | CA8         | HELLS       | ARMCX3    | JAK2        |
| IL1RAP                              | GRIK1       | RAB19      | FAXC       | POLR2B    | C5orf35    | CLK4       | METTL21D   | RAB2A       | CYP2C76     | ARMCX2    | CER1        |
| PYDC2                               | BACH1       | AGK        | MCHR2      | SRP72     | GAPT       | MGAT4B     | SOS2       | CLVS1       | DNTT        | ARMCX5    | FAM188A     |
| FGF12                               | USP16       | PRSS37     | POPC3      | PPAT      | RAB3C      | SQSTM1     | ATL1       | GGH         | PIK3AP1     | TMEM31    | C1QL3       |
| MB21D2                              | ADAMTS1     | EPHB6      | PREP       | EXOC1     | DEPDC1B    | RASGEF1C   | SAV1       | PDE7A       | UBTD1       | PLP1      | DNAJC7      |
| FAM43A                              | GABPA       | TAS2R40    | QRSL1      | SRD5A3    | NDUFAF2    | OR2Y1      | GNPNAT1    | RDH10       | AVP11       | FAM199X   | HCRT        |
| ACAP2                               | BTG3        | FAM115C    | SOBP       | KIT       | KIF2A      | MGAT1      | CDKN3      | UBE2W       | GOLGA7B     | CXH2orf57 | CNP         |
| DLG1                                | COX19       | ZNF862     | SEC63      | PPM1K     | RGS7BP     | CHRNA7     | CNIH       | PKIA        | NDUF88      | MORC4     | KLHL15      |
| CEP19                               | ZFAND2A     | GIMAP4     | GTF2H5     | NAP1L5    | SREK1IP1   | SCG5       | FBXO34     | IL7         | C9H10orf2   | ITC22D3   | PCYT1B      |
| LOC711340                           | FTSJ2       | GIMAP2     | TFB1M      | HPGDS     | C6H5orf44  | GREM1      | NAA30      | TPD52       | LBX1        | ATG4A     | MPK4        |
| PDIA2                               | NUDT1       | CDK5       | CNKSR3     | BMPR1B    | PIK3R1     | ZNF770     | PSMA3      | ZNF704      | ELOVL3      | NXT2      | SMAD4       |
| C20H16orf13                         | ZDHH4       | RHEB       | IPCEF1     | E1F4E     | SLC30A5    | GPR176     | DAAM1      | PMP2        | ACTR1A      | RGAG1     | C18H18orf32 |
| FAM195A                             | MYCT1       | ACTR3B     | METAP1     | GTF2H2    | PLCB2      | MNAT1      | CHMP4C     | SFXN2       | CHRD1L      | ZNF304    | SERPINA5    |
| STUB1                               | FAM200A     | HTR5A      | C4H6orf211 | MAPKSP1   | CARTPT     | C7H15orf57 | SNAPC1     | LOC696190   | C9H10orf32  | LHFPL1    | ZNF671      |
| NARFL                               | ZNF498      | CNPY1      | ZBTB2      | NFKB1     | MAP1B      | PLA2G4B    | ZBTB25     | TRIQK       | OBFC1       | HNRNPH2   | ESP16.9     |
| GNG13                               | ZKSCAN1     | NDUSP2     | TAB2       | UBE2D3    | UTP15      | CDAN1      | GPX2       | TP53INP1    | XPNPEP1     | WDR44     | NLGN1       |
| TRAF7                               | C3H7orf43   | EXOC2      | C6orf103   | TACR3     | FAM169A    | HYPK       | FNTB       | PLEKHF2     | MX1         | ZCCHC12   | LSM2        |
| ZNF263                              | CUTL1       | GMSD       | RAB32      | SGMS2     | PAPD4      | MFAP1      | MAX        | C8H8orf37   | PDCD4       | PGRMC1    | FKBP1       |
| TIGD7                               | ORAI2       | PSMG4      | STX11      | HADH      | FAM151B    | DUOX2A     | FAM71D     | PTSD5       | SHOC2       | LAMP2     | SMPD2       |
| ZNF174                              | CCL24       | FAM50B     | PLAGL1     | PLA2G12A  | CETN3      | MYEF2      | TMEM229B   | SDC2        | GPAM        | SH2D1A    | CEP57L1     |
| CREBBP                              | DNAJC30     | NRN1       | AIG1       | ENPEP     | GLRX       | EID1       | ARG2       | STK3        | AFAP1L2     | CXH2orf64 | NR2E1       |
| NMRAL1                              | CLDN4       | SLC35B3    | VTA1       | NEUROG2   | LIX1       | SECISBP2L  | RDH12      | ANKRD46     | CCDC172     | OCRL      | MND1        |
| METTL22                             | GTF2IRD1    | C4H6orf52  | ABRACL     | NDST3     | RGBM       | COPS2      | DCAF5      | PABPC1      | EMX2        | SASH3     | TLR2        |
| CARHSP1                             | GATSL2      | C4H6orf228 | HEBP2      | METTL14   | FAM174A    | FGF7       | KIAA0247   | NCALD       | RGS10       | RAB33A    | LRAT        |
| DEXI                                | WBSCR17     | C6orf105   | TNFAIP3    | NDNF      | GIN1       | DTWD1      | PCNX       | KLF10       | PPAPDC1A    | RBMX2     | SKP1        |
| PRM1                                | PHKG1       | PHACTR1    | IFNGR1     | TMEM155   | C6H5orf30  | RLIM       | SIPA1L1    | BAALC       | WDR11       | MST4      | UBE2B       |
| RRN3                                | LANCL2      | GFOD1      | TFCF21     | IL21      | NUDT12     | USP8       | RGS6       | SLC25A32    | C9H10orf120 | GPC4      | LECT2       |
| TM7                                 | VSTM2A      | CD83       | MOXD1      | SPRY1     | EFNA5      | TNFAIP8L3  | PSEN1      | ANGPT1      | ACADSB      | CCDC160   | GLCE        |
| ITPR1L2                             | IGFBP3      | MYLIP      | C4H6orf58  | PHF17     | SLC25A46   | TMOD3      | ACOT6      | EMC2        | BUB3        | PLAC1     | SENP8       |
| IQCK                                | BLVRA       | CAP2       | HEY2       | SLC1T     | STAR4D     | ARPP19     | VRTN       | EXT1        | GPR26       | BR3       | NEO1        |
| THUMPD1                             | HECW1       | NUP153     | CLVS2      | C5H4orf33 | NREP       | MNS1       | MLH3       | NOV         | FAM53B      | CD40LG    | NR2E2       |
| UBFD1                               | SFRP4       | PRL        | GJA1       | SLC7A11   | FEM1C      | FAM81A     | NEK9       | TAF2        | FAM196A     | F9        | FBLN5       |
| PRKCB                               | ELMO1       | ACOT13     | ASF1A      | MGARP     | TMED7      | GCNT3      | FOS        | DERL1       | MGMT        | SOX3      | C7H14orf142 |
| CACNG3                              | 41524       | CMAH       | SLC35F1    | NAA15     | CDO1       | RPS27L     | C7H14orf1  | FBXO32      | C9H10orf93  | TMEM185A  | CCDC3       |
| C20H16orf82                         | NPSR1       | HIST1H1A   | NUS1       | RAB33B    | TNFAIP8    | CA12       | TGFB3      | RNF139      | MTG1        | MTM1      | PRPF18      |
| PPP4C                               | RP9         | HIST1H1T   | FAM162B    | SETD7     | SRFBP1     | SNX1       | VASH1      | MYC         | PRKX        | CD99L2    | ACBD7       |
| GDPD3                               | LSM5        | HIST1H1D   | RWDD1      | ELMOD2    | 41336      | SNX22      | KIAA1737   | CHRA2       | PNPLA4      | FATE1     | E1F1AX      |
| BOLA2                               | CHN2        | ZNF322A    | COL10A1    | IL15      | C6H5orf63  | KIAA0101   | ADCK1      | PTP4A3      | TLR7        | NSDHL     | PRDX4       |
| ZNF688                              | SKAP2       | HIST1H1B   | NT5DC1     | USP38     | CTXN3      | ZNF609     | DIO2       | LYNX1       | GEMIN8      | DUSP9     | SAT1        |
| ORAI3                               | SNX10       | GPX6       | C4H6orf225 | GAB1      | SLC12A2    | RASL12     | TSHR       | LRRC14      | GLRA2       | SLC6A8    | MTCP1       |
| COX6A2                              | HNRNPA2B1   | GPX5       | TRAF3IP2   | SMARCA5   | KIAA1024L  | CLPX       | FLRT2      | ZNF7        | ASB11       | L1CAM     | RAB39B      |
| ORC6L                               | NPVF        | GABBR1     | SLC16A10   | HHP       | CDC42SE2   | RAB11A     | GALC       | ZNF250      | AP1S2       | MCEP2     | VAMP7       |
| C20H16orf87                         | MPP6        | MOG        | RPF2       | SMAD1     | IL3        | SNAPC5     | KCNK10     | IL2RA       | RBBP7       | TAZ       | USP6NL      |
| PHKB                                | NPY         | RPP21      | C6orf186   | C5H4orf51 | IRF1       | RN4        | TTC8       | PRKCQ       | SCML1       | G6PD      | RS1         |
| SLAH1                               | RAPGEF5     | NRM        | CDC40      | EDNRA     | IL13       | SMAD3      | KCNK13     | KIN         | SCML2       | H2AFB3    | MTCP1NB     |
| CBLN1                               | CDC47L      | MDC1       | FIG4       | FBXW7     | LEAP2      | FEM1B      | PSMC1      | SNX20       | ITGB8       | RPGRIPL1  | TMEM196     |
| ZNF326                              | C1H1orf21   | PX26       | GLIPR1     | CD28      | C1A01      | ENDOD1     | RRAGA      | FKBP10      | SMAD2       | NLRP8     | KCNMB2      |



**Supplemental Table 1: (iv<sub>c</sub>) H3K4me3-enriched genes in the Baboon SVZ overlap comparison between NSC and NB populations**

| NB-specific Genes (273) |             |              |          |              |              |         |            |              |              |         |          |
|-------------------------|-------------|--------------|----------|--------------|--------------|---------|------------|--------------|--------------|---------|----------|
| SSU72                   | C16H17orf59 | MRPS18C      | SNRPD3   | KIR3DL12     | PDIA3        | REG1B   | FAM20C     | MRPS16       | RANBP6       | RPL7L1  | ARL10    |
| SH2D5                   | STX8        | HNRNPD       | CRYBB2   | LOC100125569 | RSL24D1      | LYG1    | ACTB       | ECD          | CDC37L1      | TMEM30A | B4GALT7  |
| BEND5                   | GOSR1       | SUMO2        | RABL2B   | C2H3orf38    | LDHAL6B      | HNMT    | PDAP1      | DDX50        | RPL12        | MRAP2   | SPRED1   |
| PRKACB                  | CCL4L1      | LOC100499503 | PIANP    | NAA50        | SIN3A        | TSN     | ACHE       | CCAR1        | HSPA5        | OPRM1   | CHP1     |
| LMO4                    | CCL11       | TMEM165      | TAS2R13  | GTF2E1       | IMP3         | CFL1    | RABL5      | PAPSS2       | OGN          | PEX3    | FAM136A  |
| ZCRB1                   | MRPL10      | ELOVL6       | TAS2R46  | SUCLG2       | SNX33        | EHD1    | CHCHD2     | CH25H        | NSFL1C       | FOXA3   | STAMBIP  |
| TMED5                   | VMP1        | TRAM1L1      | PRKAG1   | RPP14        | MRPS11       | SDHAF2  | MRPS17     | FRA10AC1     | TRMT6        | NAPA    | POLE4    |
| GPR89B                  | HNF1B       | GUCY1B3      | SLC4A8   | TEX264       | NRGN         | OR5AN1  | STARD3NL   | POLL         | TMEM90B      | BAX     | TIA1     |
| BOLA1                   | KRTAP4-1    | PPID         | MAP3K12  | RPSA         | OR4Q3        | OR10Q1  | GGCT       | BCCIP        | ZNF280B      | LIN7B   | NUDT7    |
| SF3B4                   | TMEM106A    | FBXO8        | OR6C4    | NDUF85       | TMEM55B      | TIMM10  | NUPL2      | NKX6-2       | LOC100499557 | SURF6   | MPHOSPH6 |
| HAX1                    | MRP63       | EXOC3        | WIBG     | PDCD10       | WDR12        | OR4B1   | BET1       | CYP2E1       | ZNF22        | LPAR1   | FOXC2    |
| RT1                     | OR5L1       | LOC100499546 | TBK1     | SCHIP1       | SCFD1        | NDUFS3  | FGL2       | APOBEC3A     | OGDHL        | TXN     | ATP5J    |
| LMNA                    | SOX21       | ELOVL7       | DDT      | GK5          | HECTD1       | API5    | RINT1      | MAMU-AG      | FAM190B      | TRMT10B | THOC2    |
| FCGR2A                  | NDC80       | ENC1         | TMCC1    | FAIM         | RPL10L       | OR10A6  | TAS2R16    | MRPL41       | VSTM2L       | HNRNPL  | THG1L    |
| FCGR2B                  | CXXC1       | DTWD2        | SLC25A3  | IL20RB       | RPS29        | OR2D3   | CALU       | MAMU-B18     | RBM12        | RABAC1  | MAT2B    |
| UAP1                    | CDH7        | FGFR1OP2     | MAPKAPK5 | SATB1        | ESR2         | FOLR1   | EZH2       | COX7A2L      | TM9SF4       | IRGQ    | ATP6V0E1 |
| RNF187                  | GNF7        | SAR1B        | RPLP0    | DECR2        | ZNF596       | RAB6A   | HIST1H2BH  | TMSB4X       | SUPT7L       | CBFB    | CPSF1    |
| ARF1                    | DHPS        | CAMLG        | CSRNP3   | FAHD1        | ROAD2        | PAAF1   | MAMU-A3    | MAGEB1       | AFTPH        | PSMD7   | CDC123   |
| MOSC2                   | CYP4F22     | CSNK1A1      | EEF1B2   | TMEM114      | NAT2         | ACER3   | GNL1       | GPR34        | WDR92        | ADAT1   | CACNB2   |
| LOC100499547            | CYP4F12     | DCTN4        | CNPPD1   | EMP2         | LOC100499551 | CHORDC1 | C4H6orf136 | SERPINB6     | AMICA1       | MAMU-I  | HUWE1    |
| TRMT1L                  | OCEL1       | CDC69        | NPPC     | LCMT1        | C8H8orf46    | DCUN1D5 | TUBB       | XAGE5        | HSPA8        | MAMU-B  | H2BEWT   |
| RHOJ                    | LRP3        | C6H5orf4     | PREB     | C20H16orf54  | FABP5        | LCN9    | MAMU-DRB1  | LOC100499562 | C15H9orf172  | MICB    | CCND3    |
| MAMU-DMB                | ARHGEF6     | TAF11        | CETN2    | TREML1       | KIF1C        | PLG     | PLSCR3     | LYAR         |              |         |          |

**Supplemental Table 1: (iv<sub>d</sub>) H3K4me3-enriched genes in the Baboon SVZ overlap comparison between NSC and NB populations**

| NSC/NB overlap (477) |             |            |           |            |            |             |             |           |          |          |          |
|----------------------|-------------|------------|-----------|------------|------------|-------------|-------------|-----------|----------|----------|----------|
| HMX1                 | PPP1CB      | CNDP2      | IL17F     | SCAMP5     | ASTN1      | BTBD10      | CSRNP1      | MAPK10    | TNKS     | SLC38A2  | HSD17B3  |
| PCGF3                | YIPF4       | PQLC1      | MYO6      | STARD5     | PGBD2      | SWAP70      | DNAJC19     | TSPAN5    | TUSC3    | TMBIM6   | GLOD4    |
| VWA1                 | RASGRP3     | TXNL4A     | POLR1D    | C7H15orf40 | COX20      | RIC3        | SEC62       | DDIT4L    | FGF17    | TFCP2    | TLCO2    |
| TPRG1L               | SLC8A1      | VMAC       | SLC35A1   | PDE8A      | AKT3       | OR52W1      | SPSSB       | PPP3CA    | NEFL     | EIF4B    | TVP23B   |
| PHF13                | KCNM3       | IER2       | GJA10     | SV2B       | GREM2      | TRIM22      | GMP5        | INTS12    | FZD3     | STAC3    | ZNF287   |
| DFFA                 | RTN4        | LPAR2      | DCUN1D1   | SLCO3A1    | CHRM3      | FCHSD2      | TM4SF18     | ANKRD50   | LEPROTL1 | MDM2     | TOM1L2   |
| EFHD2                | PEX13       | PLEKHF1    | ZDHHC14   | MEF2A      | TBCE       | NDUFC2      | ACPL2       | SLC25A31  | ERLIN2   | TPH2     | B9D1     |
| TRIM63               | XPO1        | LSM14A     | GINM1     | SEC23A     | SPATA2     | FAM181B     | SOX14       | MGST2     | GINS4    | PPFIA2   | MAP2K3   |
| SMAP2                | SERTAD2     | SCN1B      | UST       | KLHL28     | ELMO2      | CCDC90B     | RAB5A       | ZNF330    | THAP1    | TMPO     | WSB1     |
| FOXJ3                | SPR         | COX7AH     | FBXO30    | GNM2       | SNTA1      | TMEM126B    | UBE2E2      | TMEM184C  | MCM4     | SCYL2    | KIAA0100 |
| TRIM63               | XRRTM1      | ZNF790     | MED23     | ERO1L      | PCB1       | CTSC        | TGFB2       | ARFIP1    | SNAI2    | SART3    | CYTH1    |
| NEGR1                | RETSAT      | ZNF345     | CENPW     | FERMT2     | FLRT3      | C14H11orf75 | CMTM7       | GRIA2     | TCEA1    | GIT2     | PYCR1    |
| ZNHIT6               | ST3GAL5     | SPINT2     | PLN       | JKAMP      | DSTN       | GPHN        | UBP1        | C5H4orf43 | ARFGEF1  | RFC5     | PSPC1    |
| CDC7                 | RNF103      | ACTN4      | HS3ST5    | TRMT5      | NANP       | SC5DL       | EIF4A2      | CBR4      | PI15     | HSPB8    | PRHOXNB  |
| CNN3                 | CNNIP3      | NFKB1B     | SNX3      | RHOJ       | CECR5      | VPS26B      | ZNF200      | FRG1      | STMN2    | FAM101A  | SLC7A1   |
| CCDC76               | INPP4A      | AKT2       | PACRG     | DCAF4      | TOP3B      | UCK1        | FAM86A      | CCDC127   | MRPS28   | PXMP2    | STARD13  |
| PTNP2                | C13H2orf40  | PRR19      | CCR6      | ELMSAN1    | RASL10A    | C15H9orf78  | ZC3H7A      | DAP       | RALYL    | SPOPL    | HTR2A    |
| NOTCH2               | INSIG2      | C19orf61   | PSMB1     | POMT2      | RBFOX2     | OR1Q1       | BFAR        | FAM134B   | CA2      | ARL6IP6  | PCDH17   |
| SEC22B               | MZT2B       | PVR        | GPR78     | GTF2A1     | EIF3D      | DBC1        | CDR2        | DROSHA    | DCAF4L2  | GCA      | PCDH9    |
| TXNIP                | IMP4        | PPP2R1A    | MRFAP1    | TDP1       | POLR2F     | SLC31A1     | TUFM        | BRIX1     | NBN      | GORASP2  | FBXL3    |
| ILF2                 | CFC1        | FCAR       | RAB28     | CPSF2      | GRAP2      | FAM206A     | C20H16orf58 | LMBRD2    | LRRRC69  | COL3A1   | DNAJC3   |
| THBS3                | CARS        | ZNF805     | TBC1D19   | GOLGA5     | TSPO       | OR13C8      | ARL2BP      | PTGER4    | FAM92A1  | NAB1     | STK24    |
| C1H1orf35            | MACROD1     | GBE1       | TBC1D1    | GSKIP      | C11H12orf4 | TMOD1       | GINS3       | PLCXD3    | MTDH     | SDPR     | UBAC2    |
| TLR5                 | C14H11orf84 | TOMM70A    | RHOH      | TRMT61A    | VWF        | C4H6orf203  | CYB5B       | SEPP1     | OSR2     | SLC39A10 | TEX30    |
| LYPLAL1              | SLC35C1     | SETD5      | GNPDA2    | CRIP1      | SLC2A3     | MTAP        | DHX38       | FGF10     | LRP12    | MOBK3    | ARGLU1   |
| CSRP1                | TSPAN18     | CAV3       | OCLAD2    | C8H8orf42  | FAR2       | SNAPC3      | ST3GAL2     | SNX18     | SYBU     | BMPR2    | PSMG2    |
| NEK7                 | ACCS        | CRBN       | STBD1     | AGPAT5     | METTL20    | KLF9        | KARS        | IL6ST     | UTP23    | GPR1     | SNRPD1   |
| RGS2                 | TRIM44      | ARL6IP5    | LPHN3     | SPAG11B    | CNTN1      | NTRK2       | SDR42E1     | HTR1A     | MED30    | LANCL1   | IMPACT   |
| C1H1orf27            | ANO3        | SNRK       | CHIC2     | CTSB       | TMEM117    | NAA35       | DPEP1       | AGGF1     | MRPL13   | SCG2     | CHST9    |
| RGS5                 | SVIP        | LYZL4      | USP46     | FDFT1      | SLC38A1    | ANGPTL2     | IFNAR1      | LHFPL2    | TRIB1    | KIAA1486 | TTR      |
| BRI3                 | FAM172A     | LARP4B     | C3H7orf33 | GABRB3     | DUSP21     | PLS3        | C3H21orf91  | HOMER1    | FAM49B   | PSMD1    | B4GALT6  |
| TMEM248              | RIOK2       | WDR37      | NCAPG2    | NDNL2      | MAGED4B    | ZBTB33      | HSPA13      | RPS23     | ST3GAL1  | MYT1L    | RIT2     |
| TPST1                | ST8SIA4     | AKR1E2     | TMEM170B  | EMC4       | MAGED2     | C1GALT1C1   | ABCC13      | CCN7      | GPIHBP1  | ROCK2    | ST8SIA5  |
| VKORC1L1             | DCP2        | DCLRE1C    | RNF144B   | ATPBD4     | SPIN3      | FAM127A     | PAPOLB      | MEF2C     | TSTA3    | RHOB     | RNF152   |
| GRB10                | TSSK1B      | PTPLA      | ID4       | VPS18      | ZC4H2      | LDOC1       | KDEL2       | ARRDC3    | ZMYND11  | MBL2     | NLGN4Y   |
| NUDCD3               | TRIM36      | THNSL1     | NRSN1     | CTDSPL2    | MSN        | SLITRK2     | SEMA3C      | MRPL22    | NT5C2    | MTPN     | NDN      |
| PSMA2                | CSNK1G3     | ARHGAP12   | GMNN      | RAB27A     | EDA2R      | CLIC2       | PHTF2       | GABRG2    | GSTO1    | MRPS33   | SNRPN    |
| C7orf36              | GRAMD3      | CSGALNACT2 | TRIM27    | PTPLAD1    | CXHorf26   | KIAA1324L   | IMMP2L      | RARS      | CACUL1   | AMELX    | CD2AP    |
| TAX1BP1              | FAM13B      | SNCG       | FLOT1     | PIAS1      | TGIF2LX    | FGF1        | BPGM        | DRD1      | HTRA1    | PML      | DRP2     |
| SP4                  | LRRTM2      | LRRTM3     | KCTD20    | HEXA       | NAP1L3     | SRI         | NDFIP1      | REEP3     |          |          |          |

Supplemental Table 1: ( $v_a$ ) H3K4me3-enriched genes in the Baboon SVZ: Gene Ontology by DAVID for H3K4me3-enriched genes in NSCs

| Over-represented Functional categories of target genes in neural stem cells identified by Gene Ontology enrichment analysis using DAVID. |       |            |             |                                                                                                                                                                                                                                                                                                                                                                                                                                                                                                                                                                                                                                                                                                                                                                                                                                                                                                                                                                                                                                                                                                                                                                                                                                                                                                                                                                                                                                    |                 |             |             |            |
|------------------------------------------------------------------------------------------------------------------------------------------|-------|------------|-------------|------------------------------------------------------------------------------------------------------------------------------------------------------------------------------------------------------------------------------------------------------------------------------------------------------------------------------------------------------------------------------------------------------------------------------------------------------------------------------------------------------------------------------------------------------------------------------------------------------------------------------------------------------------------------------------------------------------------------------------------------------------------------------------------------------------------------------------------------------------------------------------------------------------------------------------------------------------------------------------------------------------------------------------------------------------------------------------------------------------------------------------------------------------------------------------------------------------------------------------------------------------------------------------------------------------------------------------------------------------------------------------------------------------------------------------|-----------------|-------------|-------------|------------|
| Term                                                                                                                                     | Count | %          | PValue      | Genes                                                                                                                                                                                                                                                                                                                                                                                                                                                                                                                                                                                                                                                                                                                                                                                                                                                                                                                                                                                                                                                                                                                                                                                                                                                                                                                                                                                                                              | Fold Enrichment | Bonferroni  | Benjamini   | FDR        |
| GO:0042127~regulation of cell proliferation                                                                                              | 136   | 6.82388359 | 3.625E-07   | NOG, TGFB3, IL13, TNFSF12, IL15, MXI1, NR2E1, TGFB2, CTNBB1, CUL3, FNTB, CUL2, CD47, CTTNBP2, MYD88, CDKN2C, IFNG, IL1B, CHRNA7, SYK, LBX1, EFN1, IL21, PROX1, VASH1, PDCD1LG2, PTHLH, CD38, TRIM35, NME1, ADAMTS1, PMP22, EIF2AK2, EMP3, FGFR1, MVD, GNAI2, SOX2, ASZ1, CALR, SOX9, TIMP1, KRAS, PRKRA, NKX3-1, ODC1, TESC, GNRH1, BECN1, KLF10, SMAD4, DUSP22, RPS9, SMAD3, ITGA2, SMAD2, SMAD1, FOXP3, FOXP1, FOXP2, RERG, TMEM115, ADRA1A, MAB21L1, KLF4, KCTD11, SASH3, FGF7, NRP1, TACR1, MITF, PAX6, GJA1, SKAP2, PTEN, EDNRA, ARHGAP5, HEY2, CHST11, DLG3, SHC1, CSK, MYC, PRL, RHOG, PRKCA, RXFP2, CDK6, RB1, INHA, CIAO1, PRKCO, PPM1D, BTG2, BTG1, NCK1, BTG3, CD81, IL12A, TSHR, EIF5A2, CER1, ING5, EGLN3, TAC1, ZBTB16, COMT, SFN, KIT, POU1F1, STAT6, CD9, IGF1R, CYP27B1, PTN, BCL6, FKBPL, CD28, IL3, NACC2, IL2RA, IL8, IL7, IGF1, TRIM24, STAT1, CDKN3, SOD2, CDH13, MNAT1, IRF6, JAK2, ATP5A1, IGFBP3, SCAND1, BMPR1A                                                                                                                                                                                                                                                                                                                                                                                                                                                                                          | 1.522963135     | 0.001479717 | 0.001479717 | 0.00067518 |
| GO:0007242~intracellular signaling cascade                                                                                               | 199   | 9.98494732 | 4.08739E-07 | ADCY3, ADCY2, RAB1A, CTNBB1, DIRAS3, S1PR4, IFNG, GAB1, RAPGEF5, PIK3CA, CHRNA7, DEPDC1B, DDAH1, MAP2K6, SYK, GTPBP2, PIK3CG, MAPKSP1, TNK1, KIAA1804, CYP26A1, TANK, CRHR1, RAD1, RND3, CD36, RAB19, RAB14, RAB13, IRAK1BP1, GNAI2, CNIH, DUSP10, ASB11, ARF6, CALR, DUSP19, KRAS, CDC42EP4, DUSP22, SMAD2, OXSR1, SMAD1, PTPN11, RERG, RGS1, NPY, CD209, RGS6, RHEB, PLA2G4B, GNAZ, TOLLIP, SHOC2, EDNRA, MC5R, RAB6B, AGAP1, ARL5B, AGAP2, HTR5A, RAP2B, RAP2A, SRPK2, AR, RXFP2, ELMO1, DNAJC27, SS18, MED4, PSEN1, GNAQ, GNB1, DNAJC25, GADD45G, PSEN2, RBM38, SIAH2, CARHSP1, RAB3C, USP8, NPY2R, GNG13, RTKN, KIT, SFN, PLCL1, MDC1, SQSTM1, RB1CC1, SOS2, RAB11B, RAB11A, RAB2A, IL8, SPSB1, IGF1, NPY1R, STAT1, SOD1, STAT2, NAE1, P2RY12, RAB32, CDH13, RAB31, RAB30, YWHAH, P2RY11, DUSP1, RAB37, RAB22A, CHN2, DUSP9, DUSP6, TGFB3, TLR2, TLR4, RPS27L, RASGEF1C, TLR7, RGL1, ARL11, SPRED2, RALB, IL1B, SOCS3, STK3, PTHLH, COL1A2, ASB1, CARTPT, ASB3, ASB7, FGFR1, GRAP, MRAS, AZI2, CNR1, P2RY1, RHOBTB1, DYRK2, TRAF7, STK38L, ITK, TLR10, TAF7, VAV2, RAB33A, RAB33B, TRAF3IP2, PDE7A, ADRA1A, IKBKB, NDST1, TACR1, PRDX4, ARHGAP5, CXCR4, RASL10B, SHC1, SHC3, CSK, PRL, PLCB2, RHOG, PRKCA, CDK1, RABL3, RAB39B, RB1, ARL6, RASL12, PRKCE, CDK5, DAPK1, PRKCB, PRKCO, CHRM4, CA8, KRIT1, CD81, TSHR, NKIRAS1, HCRT, EGLN2, TMED7, IGF1R, TYMS, ROPN1B, HRH2, REN, PIK3R1, FKBPL, CKS2, JAK1, JAK2, FAF1, SMPD2 | 1.396331874     | 0.001668307 | 0.000834502 | 0.0007613  |
| GO:0010941~regulation of cell death                                                                                                      | 138   | 6.92423482 | 9.57357E-07 | MAEA, MMP9, TGFB3, MAEL, TLR2, RPS27L, TLR4, TNFSF12, SGMS1, PMAIP1, NR2E1, CRADD, TGFB2, CUL3, CUL2, G2E3, MYD88, CDKN2C, IFNG, IL1B, PIK3CA, FAS, TWIST2, MAP2K6, PIK3CG, SOCS3, ADAMTS20, PIM2, F7, STK3, CD38, TRIM35, CD40LG, NME1, TNFAIP8, TNFAIP3, TRAF1, CDK5R1, GCLC, RRAGA, PPT1, CALR, SOX9, MST4, TIMP3, PLAGL1, PEA15, KRAS, ALB, PRKRA, NKX3-2, GLO1, DYRK2, TRAF7, PTCRA, HELLS, SPPL3, GNRH1, BECN1, KLF10, NR4A2, SMAD3, VAV2, PPIF, DLX1, TNFSF10, SFRP1, PDCD5, IKBKB, MITF, FASLG, NFKB1, PTEN, PRDX1, ACVR1C, PAK7, BOK, CHST11, MYC, PRKCA, KCNMA1, CDK1, SLC25A4, RXFP2, INHA, PRKCE, NLRP3, CDK5, DAPK1, BTG2, PSEN1, BTG1, PSEN2, NAI1, IL12A, KCNH8, PRNP, CLN8, MGMT, ZBTB16, SFN, KIT, FEM1B, IGF1R, SQSTM1, RB1CC1, SOS2, DAD1, CD2, PCSK9, BCL6, AATF, ERCC3, TEX261, IL3, IL2RA, IL7, CREB1, IGF1, STAT1, SOD1, ANXA4, BIRC2, SOD2, TNFSF8, NAE1, NCSTN, CDH13, MNAT1, DUSP1, IFT57, BNIP3L, JAK2, FAF1, IGFBP3, SCAND1, SMPD2, TP53INP1                                                                                                                                                                                                                                                                                                                                                                                                                                                           | 1.492267541     | 0.003903168 | 0.001302753 | 0.00178312 |
| GO:0042981~regulation of apoptosis                                                                                                       | 135   | 6.77370798 | 1.98003E-06 | MAEA, MMP9, TGFB3, MAEL, TLR2, RPS27L, TLR4, TNFSF12, SGMS1, PMAIP1, NR2E1, CRADD, TGFB2, CUL3, CUL2, G2E3, MYD88, CDKN2C, IFNG, IL1B, PIK3CA, FAS, MAP2K6, TWIST2, PIK3CG, SOCS3, ADAMTS20, PIM2, F7, STK3, CD38, TRIM35, CD40LG, NME1, TNFAIP8, TNFAIP3, TRAF1, CDK5R1, GCLC, PPT1, CALR, SOX9, MST4, TIMP3, PLAGL1, PEA15, KRAS, ALB, PRKRA, NKX3-2, GLO1, DYRK2, TRAF7, PTCRA, HELLS, SPPL3, GNRH1, BECN1, KLF10, NR4A2, SMAD3, VAV2, PPIF, DLX1, TNFSF10, SFRP1, PDCD5, IKBKB, MITF, FASLG, NFKB1, PTEN, PRDX1, ACVR1C, PAK7, BOK, CHST11, MYC, PRKCA, KCNMA1, CDK1, RXFP2, INHA, PRKCE, NLRP3, CDK5, DAPK1, BTG2, PSEN1, BTG1, PSEN2, NAI1, IL12A, KCNH8, PRNP, CLN8, MGMT, ZBTB16, SFN, FEM1B, IGF1R, SQSTM1, RB1CC1, SOS2, DAD1, CD2, PCSK9, BCL6, AATF, ERCC3, TEX261, IL3, IL2RA, IL7, CREB1, IGF1, STAT1, SOD1, ANXA4, BIRC2, SOD2, TNFSF8, NAE1, NCSTN, CDH13, MNAT1, DUSP1, IFT57, BNIP3L, JAK2, FAF1, IGFBP3, SCAND1, SMPD2, TP53INP1                                                                                                                                                                                                                                                                                                                                                                                                                                                                                | 1.479799699     | 0.008055797 | 0.002020062 | 0.00368785 |
| GO:0008285~negative regulation of cell proliferation                                                                                     | 72    | 3.61264425 | 2.113E-06   | NOG, PAX6, TGFB3, GJA1, IL15, SKAP2, MXI1, PTEN, TGFB2, FNTB, CTTNBP2, CUL2, CDKN2C, IFNG, DLG3, IL1B, CSK, PRKCA, LBX1, RXFP2, CDK6, RB1, PROX1, PDCD1LG2, VASH1, PTHLH, TRIM35, PPM1D, BTG2, BTG1, NME1, BTG3, IL12A, ADAMTS1, PMP22, EMP3, EIF2AK2, ING5, CER1, ASZ1, SFN, COMT, ZBTB16, POU1F1, CD9, CYP27B1, PRKRA, NKX3-1, BCL6, TESC, IL2RA, IL8, GNRH1, BECN1, KLF10, SMAD4, SMAD3, SMAD2, TRIM24, SMAD1, CDKN3, FOXP3, SOD2, RERG, TMEM115, CDH13, IRF6, ADRA1A, JAK2, ATP5A1, IGFBP3, KLF4                                                                                                                                                                                                                                                                                                                                                                                                                                                                                                                                                                                                                                                                                                                                                                                                                                                                                                                               | 1.757723298     | 0.008594476 | 0.001724835 | 0.00393552 |

Supplemental Table 1: (v<sub>b</sub>) H3K4me3-enriched genes in the Baboon SVZ: Gene Ontology by DAVID for H3K4me3-enriched genes in NSCs

| Term                                                 | Count | %          | PValue      | Genes                                                                                                                                                                                                                                                                                                                                                                                                                                                                                                                                                                                                                                                                                                                                                                                                                                                                                                                                                                                                                                                                                      | Fold Enrichment | Bonferroni  | Benjamini   | FDR        |
|------------------------------------------------------|-------|------------|-------------|--------------------------------------------------------------------------------------------------------------------------------------------------------------------------------------------------------------------------------------------------------------------------------------------------------------------------------------------------------------------------------------------------------------------------------------------------------------------------------------------------------------------------------------------------------------------------------------------------------------------------------------------------------------------------------------------------------------------------------------------------------------------------------------------------------------------------------------------------------------------------------------------------------------------------------------------------------------------------------------------------------------------------------------------------------------------------------------------|-----------------|-------------|-------------|------------|
| GO:0043067~regulation of programmed cell death       | 136   | 6.82388359 | 2.12276E-06 | MAEA, MMP9, TGFB3, MAEL, TLR2, RPS27L, TLR4, TNFSF12, SGMS1, PMAIP1, NR2E1, CRADD, TGFB2, CUL3, CUL2, G2E3, MYD88, CDKN2C, IFNG, IL1B, PIK3CA, FAS, TWIST2, MAP2K6, PIK3CG, SOCS3, ADAMTS20, PIM2, F7, STK3, CD38, TRIM35, CD40LG, NME1, TNFAIP8, TNFAIP3, TRAF1, CDK5R1, GCLC, PPT1, CALR, SOX9, MST4, TIMP3, PLAGL1, PEA15, KRAS, ALB, PRKRA, NKX3-2, GLO1, DYRK2, TRAF7, PTCRA, HELLS, SPPL3, GNRH1, BECN1, KLF10, NR4A2, SMAD3, VAV2, PPIF, DLX1, TNFSF10, SFRP1, PDCD5, IKBKB, MIF, FASLG, NFKB1, PTEN, PRDX1, ACVR1C, PAK7, BOK, CHST11, MYC, PRKCA, KCNMA1, CDK1, RXFP2, INHA, PRKCE, NLRP3, CDK5, DAPK1, BTG2, PSEN1, BTG1, PSEN2, NAI1, IL12A, KCN8, PRNP, CLN8, MGMT, ZBTB16, SFN, KIT, FEM1B, IGF1R, SQSTM1, RB1CC1, SOS2, DAD1, CD2, PCSK9, BCL6, AATF, ERCC3, TEX261, IL3, IL2RA, IL7, CREB1, IGF1, STAT1, SOD1, ANXA4, BIRC2, SOD2, TNFSF8, NAE1, NCSTN, CDH13, MNAT1, DUSP1, IFT57, BNIP3L, JAK2, FAF1, IGFBP3, SCAND1, SMPD2, TP53INP1                                                                                                                                     | 1.476073876     | 0.008633975 | 0.0014442   | 0.00395368 |
| GO:0005525~GTP binding                               | 70    | 3.51229303 | 5.57146E-06 | GNAZ, GNA14, ATL1, EIF5B, RAB1A, ARL11, ARHGAP5, DIRAS3, MTG1, ARL15, RASL10B, RALB, RAB6B, AGAP1, MX2, ARL5B, AGAP2, RHOG, GTPBP2, RAP2B, RAP2A, RABL3, RAB39B, OLA1, EEF2, ARL6, RASL12, RND3, DNAJC27, GNAQ, RAB19, NME1, RAB14, TNNI3K, RAB13, NKIRAS1, GPN2, ADSS, RAB3C, GNAI2, MRAS, FKBP4, RRAGA, RTKN, ARF6, RRAGB, KRAS, LANCL2, RAB11B, RAB11A, RHOBTB1, SCG5, TRAF7, ERCC3, EHD3, GIMAP2, RAB2A, GIMAP4, SRP54, GNAO1, PCK2, RAB33A, RAB33B, RERG, RAB32, RAB31, RAB30, RAB37, RAB22A, RHEB, FPGT                                                                                                                                                                                                                                                                                                                                                                                                                                                                                                                                                                              | 1.72897214      | 0.007332901 | 0.007332901 | 0.00911446 |
| GO:0005794~Golgi apparatus                           | 140   | 7.02458605 | 7.09567E-06 | SGMS2, PITPNB, TRAPPC2L, SGMS1, IL15, RAB1A, TAPBP, CUL3, G2E3, PSKH1, PICALM, UBXN2B, ST3GAL4, CREB3L4, NCALD, TMEM22, BICD2, YIF1A, GLCE, GCC1, TNKS2, MGAT1, PNPLA8, RND3, CD36, ATP2C1, CHPF, VAMP7, BACE1, RAB14, RAB13, EXT1, TRAPPC3, GCNT3, NAPG, CNIH, SNX1, RER1, MYEF2, RRAGA, ARF6, PPT1, LMAN1, OCRL, PAQR3, MST4, RRAGB, GAD2, ARPC2, STX16, SLC30A5, B3GNT2, OLFM3, STX11, STX10, SRGN, GAL3ST1, B4GALT4, SLC30A7, MGAT4B, GABARAPL2, MGAT4A, ST6GAL1, BECN1, TAF7, RAB33B, TMEM115, FAM198B, DUSP26, GOLGA7B, YIPF5, FPGT, NDST3, FGF7, NDST1, ATL1, GNPAT1, GJA1, GOLGA7, ST6GALNAC3, AP1S2, CHST10, CREG2, TRAPPC6B, CHST11, CHST13, GKAP1, RAB6B, JAKMIP2, PLCB2, STX6, WBSCR17, CHST2, SACM1L, CHST1, ZDHHC17, PSEN1, CHST7, PSEN2, ARCN1, TNNI3K, WASL, WDR44, PRNP, TRAPPC10, GALNT2, GALNT1, AP1M1, FUT9, GANAB, HS3ST1, GALNT4, NUFIP2, SEC14L1, GLIPR2, TMED7, SLC35B3, PLA2G12A, SLC35B4, RAB11A, INPP5E, AATF, FIBIN, RNF122, SNAP25, GALNT12, HPGDS, RAB2A, ICA1, SELM, B3GALT2, HS3ST3A1, B3GALT1, SOD3, NCSTN, CSGALNACT1, RAB30, LARGE, TOM1L1, IFT57, COG1 | 1.433069807     | 0.004297822 | 0.004297822 | 0.01049588 |
| GO:0007264~small GTPase mediated signal transduction | 61    | 3.06071249 | 1.26792E-05 | SHOC2, RASGEF1C, RAB1A, RGL1, ARL11, ARHGAP5, DIRAS3, RASL10B, RALB, RAPGEF5, RAB6B, SHC1, SHC3, AGAP1, ARL5B, AGAP2, RHOG, GTPBP2, RAP2B, RAP2A, RABL3, RAB39B, ARL6, RASL12, ELMO1, DNAJC27, RND3, RAB19, GNB1, KRIT1, COL1A2, RAB14, SIAH2, RAB13, NKIRAS1, USP8, RAB3C, GRAP, MRAS, RTKN, ARF6, KRAS, ROPN1B, SOS2, RAB11B, RHOBTB1, RAB11A, CDC42EP4, RAB2A, IGF1, VAV2, RAB33A, RAB33B, RERG, RAB32, CDH13, RAB31, RAB30, RAB37, RAB22A, RHEB                                                                                                                                                                                                                                                                                                                                                                                                                                                                                                                                                                                                                                        | 1.762605863     | 0.050476457 | 0.007371972 | 0.02361317 |
| GO:0032561~guanyl ribonucleotide binding             | 70    | 3.51229303 | 1.40754E-05 | GNAZ, GNA14, ATL1, EIF5B, RAB1A, ARL11, ARHGAP5, DIRAS3, MTG1, ARL15, RASL10B, RALB, RAB6B, AGAP1, MX2, ARL5B, AGAP2, RHOG, GTPBP2, RAP2B, RAP2A, RABL3, RAB39B, OLA1, EEF2, ARL6, RASL12, RND3, DNAJC27, GNAQ, RAB19, NME1, RAB14, TNNI3K, RAB13, NKIRAS1, GPN2, ADSS, RAB3C, GNAI2, MRAS, FKBP4, RRAGA, RTKN, ARF6, RRAGB, KRAS, LANCL2, RAB11B, RAB11A, RHOBTB1, SCG5, TRAF7, ERCC3, EHD3, GIMAP2, RAB2A, GIMAP4, SRP54, GNAO1, PCK2, RAB33A, RAB33B, RERG, RAB32, RAB31, RAB30, RAB37, RAB22A, RHEB, FPGT                                                                                                                                                                                                                                                                                                                                                                                                                                                                                                                                                                              | 1.68371109      | 0.018421943 | 0.009253788 | 0.02302474 |
| GO:0019001~guanyl nucleotide binding                 | 70    | 3.51229303 | 1.40754E-05 | GNAZ, GNA14, ATL1, EIF5B, RAB1A, ARL11, ARHGAP5, DIRAS3, MTG1, ARL15, RASL10B, RALB, RAB6B, AGAP1, MX2, ARL5B, AGAP2, RHOG, GTPBP2, RAP2B, RAP2A, RABL3, RAB39B, OLA1, EEF2, ARL6, RASL12, RND3, DNAJC27, GNAQ, RAB19, NME1, RAB14, TNNI3K, RAB13, NKIRAS1, GPN2, ADSS, RAB3C, GNAI2, MRAS, FKBP4, RRAGA, RTKN, ARF6, RRAGB, KRAS, LANCL2, RAB11B, RAB11A, RHOBTB1, SCG5, TRAF7, ERCC3, EHD3, GIMAP2, RAB2A, GIMAP4, SRP54, GNAO1, PCK2, RAB33A, RAB33B, RERG, RAB32, RAB31, RAB30, RAB37, RAB22A, RHEB, FPGT                                                                                                                                                                                                                                                                                                                                                                                                                                                                                                                                                                              | 1.68371109      | 0.018421943 | 0.009253788 | 0.02302474 |
| GO:0030145~manganese ion binding                     | 36    | 1.80632213 | 1.64306E-05 | FHIT, GALNT2, GALNT1, DICER1, GALNT4, EPT1, PPM1B, EXTL2, ACVR1C, ARG2, REXO2, IDH1, DYRK2, B3GNT2, PPP4C, GALNT12, B4GALT4, PPTC7, NUDT18, B3GALT2, NUDT12, B3GALT1, WBSCR17, IDH3B, PCK2, PPP1CC, XPNPEP1, RIMKLA, SOD2, LAP3, PPM1D, ATP2C1, PPM1K, BMPR1B, PPP5C, BMPR1A                                                                                                                                                                                                                                                                                                                                                                                                                                                                                                                                                                                                                                                                                                                                                                                                               | 2.147903052     | 0.021471175 | 0.007208902 | 0.02687695 |

**Supplemental Table 1: (vi) H3K4me3-enriched genes in the Baboon SVZ: Gene Ontology by DAVID for H3K4me3-enriched genes in NBs**

| Over-represented Functional categories of target genes in neuroblast cells identified by Gene Ontology enrichment analysis using DAVID. |       |            |            |                                                                                                                                                                                  |                 |             |             |            |
|-----------------------------------------------------------------------------------------------------------------------------------------|-------|------------|------------|----------------------------------------------------------------------------------------------------------------------------------------------------------------------------------|-----------------|-------------|-------------|------------|
| Term                                                                                                                                    | Count | %          | PValue     | Genes                                                                                                                                                                            | Fold Enrichment | Bonferroni  | Benjamini   | FDR        |
| GO:0003735~structural constituent of ribosome                                                                                           | 14    | 5.76131687 | 5.5574E-07 | MRPS17, RPSA, MRPS16, MRPL41, MRPS11, RPL10L, MRPL10, MRPS18C, RPS29, RPLP0, RPL7L1, RPL12, RSL24D1, MRP63                                                                       | 6.010648148     | 0.000197267 | 0.000197267 | 0.00076167 |
| GO:0030529~ribonucleoprotein complex                                                                                                    | 24    | 9.87654321 | 9.258E-07  | ACTB, RPSA, MRPS17, MRPS16, MRPL41, SNRPD3, MRPS11, ZCRB1, SF3B4, RPL10L, HNRNPL, MRPL10, IMP3, MRPS18C, RPS29, RPLP0, RPL7L1, HNRNPD, WDR12, RSL24D1, RPL12, API5, HSPA8, MRP63 | 3.290972483     | 0.000271223 | 0.000271223 | 0.00123269 |
| GO:0005840~ribosome                                                                                                                     | 15    | 6.17283951 | 2.0801E-06 | MRPS17, RPSA, MRPS16, MRPL41, MRPS11, RPL10L, MRPL10, IMP3, MRPS18C, RPS29, RPLP0, RPL7L1, RPL12, RSL24D1, MRP63                                                                 | 4.926891944     | 0.000609284 | 0.000304688 | 0.0027696  |
| GO:0033279~ribosomal subunit                                                                                                            | 11    | 4.52674897 | 1.2912E-05 | RPL10L, RPSA, MRPL10, MRPS17, MRPS16, MRPS18C, MRPL41, RPS29, RPLP0, RPL7L1, MRPS11                                                                                              | 6.068801796     | 0.003776173 | 0.001260312 | 0.0171912  |

Supplemental Table 2: (i<sub>a</sub>) GBM1 RNA-Seq and H3K4me3 ChIP-Seq

| Overlap between GBM1 RNA-Seq and ChIP-Seq |           |          |          |          |          |         |          |          |         |          |          |          |
|-------------------------------------------|-----------|----------|----------|----------|----------|---------|----------|----------|---------|----------|----------|----------|
| Total=367 genes                           |           |          |          |          |          |         |          |          |         |          |          |          |
| CXCR4                                     | CD28      | GGPS1    | NDNF     | NPVF     | FMO2     | LCN9    | SPRYD4   | SKA2     | OR14J1  | LDHAL6B  | KIR3DL2  | MDM2     |
| TCEANC2                                   | F10       | EIF5A2   | PRIM2    | LRRC57   | HFE      | ITK     | PAX9     | CENPM    | SLC19A2 | TMEM196  | PTGFR    | WDR5B    |
| BRCA1                                     | SLC16A4   | FAM83C   | ZNF805   | TPH2     | DTL      | NDC80   | SCML2    | SAR1B    | GNRH2   | NAA38    | SSR3     | ZNF345   |
| FOXP3                                     | LILRA1    | ADAMTS20 | IF16     | PATE4    | LPAR6    | MYC     | PIWIL1   | MITF     | LYRM2   | CLDN14   | TMEM252  | RPS27L   |
| FPGT                                      | OR13A1    | DCAF8L2  | CAV3     | TREML1   | CCR5     | DTWD2   | CYP4V2   | RNF14    | GK2     | FCF1     | MTF1     | UGDH     |
| CDK1                                      | SYNJ2BP   | TLR3     | BVES     | TSHR     | SEMA5A   | OIP5    | LEPR     | TMEM39A  | ATF3    | CTSC     | DCLRE1C  | OSM      |
| SNAPC1                                    | PLG       | IGJ      | SPP1     | TMC7     | WDR55    | OR6C4   | EGR2     | METTL20  | DPP4    | APOBEC3A | FCGR2B   | GIN3     |
| METTL21A                                  | CRIP1     | RGS2     | PHOSPHO2 | PCP2     | EBLN2    | TWSG1   | FKBP10   | KIAA0355 | SDR42E1 | TCF19    | PPP3R2   | FMO3     |
| GNB4                                      | DTD2      | COL3A1   | CD2      | NFE2     | THAP6    | RHBG    | PEX13    | ARL6IP6  | TRMT10B | H2BFWT   | RPL7L1   | ACTL9    |
| MAD2L1                                    | GJC1      | DUSP19   | HPGDS    | AMICA1   | CCL3     | CCL11   | ACVR1C   | FAM126B  | FKBP14  | PRSS37   | DUOXA2   | TAS2R39  |
| HP                                        | CCDC42    | FAM105A  | FCAR     | SLC6A4   | IRAK4    | IDO1    | TM4SF18  | OR5K1    | LRRC69  | CYP4F12  | COMMD2   | TAS2R13  |
| CLCA1                                     | HIST1H1D  | OR13C8   | SLC30A7  | SLCO1B3  | BET1     | METTL18 | TMEM106A | RAD1     | CXCL11  | STAC3    | RAB27A   | SERPINH1 |
| IL23A                                     | SLC25A31  | LSM5     | EDA2R    | NRP1     | HS3ST3A1 | OGN     | UTP23    | TM4SF20  | SMC4    | PDCD1    | SNAP23   | AKAP2    |
| STOML3                                    | RABL5     | GIN34    | GPR1     | TNFSF10  | MSRB3    | FAM83B  | GOSR1    | ABCC2    | TAS2R46 | LYZ      | TNFAIP8  | DEPDC1B  |
| TRIM45                                    | CASP4     | GPR34    | WDR38    | NUDT7    | LYAR     | PDP2    | GPHA2    | ZNF177   | ODAM    | OLFML3   | NPSR1    | PIGW     |
| CENPL                                     | HIST1H2BH | RIT1     | CHMP4C   | SPEM1    | WSCD1    | TNFSF8  | FOXA3    | RS1      | SYNRG   | POU5F1   | CMBL     | ZNF501   |
| FAM161A                                   | HIST1H2BO | KRTAP4-1 | XCL1     | METTL15  | PTPN22   | DCAF4L2 | DFFA     | MAVS     | KCNMB1  | CLDN1    | LECT2    | NEUROG2  |
| IFNAR1                                    | ATPBD4    | GNRHR2   | RBM34    | LY6G6C   | ST8SIA4  | METAP2  | TTR      | SPINK9   | ZBTB26  | DBR1     | PDSS2    | NR1I2    |
| TLR5                                      | MAGEB10   | TSSK1B   | CCR6     | CDK6     | F7       | RHOJ    | BST2     | CER1     | IL15    | LAMB2    | MC5R     | GLYAT    |
| SPATS2L                                   | JRKL      | CLEC18A  | CXCR3    | P2RY1    | RHOH     | TACR3   | OTX2     | FAM200A  | TMEM27  | HNF1B    | INMT     | SCG2     |
| WSB1                                      | RNASE4    | ELF5     | AQP3     | QPCTL    | CCDC172  | ADAT1   | CYP2C18  | CYP4F22  | SNX20   | IL1B     | OR1F1    | LEPRE1   |
| PROS1                                     | NEK2      | IL20RB   | METTL21B | IL1RAP   | LCA5L    | FZD3    | SGMS2    | ACP5     | NANP    | REN      | PCDHB1   | HNMT     |
| TBCCD1                                    | OR6X1     | ZNF250   | SLC35E1  | OR1Q1    | OPA3     | ABCC13  | QTRTD1   | RHOJ     | DCAF16  | LRAT     | OR2D3    | GPR85    |
| ITGA2                                     | FAM115C   | TM4SF19  | NAIF1    | IL3      | MAGOHB   | COMMD6  | CD3G     | RIOK2    | ANGPT1  | BARX2    | DNAJC24  | ASPM     |
| MME                                       | TFDP2     | FBXO32   | TFPI     | MGARP    | TNFAIP6  | FAM20C  | TMOD1    | IL17F    | TMEM45B | EDNRA    | NKX3-2   | KLHL28   |
| GADD45B                                   | PRL       | PAPOLB   | DPEP1    | MAGEC2   | TCF21    | COL1A2  | GPX5     | OR52W1   | KRIT1   | FNDC8    | JUN      | HMGB1    |
| FCGR2A                                    | ARL11     | GRAP2    | BBS5     | GPX6     | LXN      | VRTN    | TOR1AIP2 | METTL2A  | OR2A2   | IRF3     | OR10Q1   | CDNF     |
| SLC31A1                                   | EZH2      | LBX1     | GIPC3    | SREK1IP1 | PI15     | AGR2    | CES5A    | NAT2     | GLYATL3 | SLC25A21 | SERPINC1 | EYA3     |
| CXCL9                                     | SNAI2     | MTAP     |          |          |          |         |          |          |         |          |          |          |

Supplemental Table 2: (i<sub>b</sub>) GBM1 RNA-Seq and H3K4me3 ChIP-Seq

| Over-represented Functional categories of overlap genes in GBM1 RNA-Seq and ChIP-Seq, identified by Gene Ontology enrichment analysis using DAVID. |       |            |             |                                                                                                                                                                                                                              |                 |             |             |            |  |
|----------------------------------------------------------------------------------------------------------------------------------------------------|-------|------------|-------------|------------------------------------------------------------------------------------------------------------------------------------------------------------------------------------------------------------------------------|-----------------|-------------|-------------|------------|--|
| Term                                                                                                                                               | Count | %          | Pvalue      | Genes                                                                                                                                                                                                                        | Fold Enrichment | Bonferroni  | Benjamini   | FDR        |  |
| GO:0009611--response to wounding                                                                                                                   | 33    | 9.4017094  | 3.44955E-08 | CCL3, NRP1, COL3A1, CXCL9, TLR3, IL15, TLR5, CXCL11, IL23A, LAMB2, CXCR4, IL1RAP, P2RY1, IL17F, SERPINC1, IL1B, RAB27A, SPP1, SCG2, F10, LYZ, ITGA2, F7, IDO1, PLG, CCL11, TNFAIP6, IL20RB, CCR5, TFPI, TREML1, PROS1, PATE4 | 3.051845775     | 6.71261E-05 | 6.71261E-05 | 5.9119E-05 |  |
| GO:0050878--regulation of body fluid levels                                                                                                        | 14    | 3.98860399 | 5.93052E-06 | NFE2, F10, COL3A1, ITGA2, F7, PLG, PDSS2, P2RY1, SERPINC1, TFPI, TREML1, PROS1, AGR2, RAB27A                                                                                                                                 | 4.866687224     | 0.011474485 | 0.005753795 | 0.01016339 |  |
| GO:0005125--cytokine activity                                                                                                                      | 16    | 4.55840456 | 7.0042E-06  | CER1, IL3, CCL3, CXCL9, IL15, CXCL11, TNFSF8, CCL11, OSM, TNFSF10, IL23A, IL17F, IL1B, XCL1, SPP1, SCG2                                                                                                                      | 4.161217949     | 0.003328458 | 0.003328458 | 0.01001609 |  |
| GO:0006955--immune response                                                                                                                        | 33    | 9.4017094  | 1.11981E-05 | MAVS, CCL3, CXCL9, TLR3, ACP5, HFE, IL15, TLR5, CXCL11, PDCD1, IL23A, LILRA1, CXCR4, IL1RAP, IL1B, RAB27A, CD28, IL3, BST2, IGJ, TNFSF8, CCL11, DCLRE1C, OSM, TNFSF10, CCR6, IL20RB, FCGR2B, FCAR, CCR5, CTSC, XCL1, TREML1  | 2.344171393     | 0.021555813 | 0.007237526 | 0.01918978 |  |
| GO:0007599--hemostasis                                                                                                                             | 12    | 3.41880342 | 1.2085E-05  | F10, NFE2, P2RY1, COL3A1, TFPI, SERPINC1, ITGA2, F7, TREML1, PROS1, PLG, RAB27A                                                                                                                                              | 5.44605475      | 0.023243116 | 0.005862125 | 0.02070951 |  |
| GO:0005615--extracellular space                                                                                                                    | 32    | 9.11680912 | 1.32318E-05 | CER1, TWSG1, CCL3, LEPR, COL3A1, CXCL9, HP, IL15, CXCL11, TTR, IL23A, REN, IL17F, SERPINC1, IL1B, ANGPT1, LECT2, SCG2, RS1, SPP1, IL3, CLCA1, ADAMTS20, LYZ, PLG, TNFSF8, CCL11, OSM, TNFSF10, COL1A2, TFPI, XCL1            | 2.360139638     | 0.003816718 | 0.003816718 | 0.01757953 |  |

Supplemental Table 2: (ii<sub>a</sub>) GBM2 RNA-Seq and H3K4me3 ChIP-Seq

| Overlap between GBM2 RNA-Seq and ChIP-Seq |          |           |         |          |         |           |          |           |           |          |          |          |
|-------------------------------------------|----------|-----------|---------|----------|---------|-----------|----------|-----------|-----------|----------|----------|----------|
| Total=451 Genes                           |          |           |         |          |         |           |          |           |           |          |          |          |
| DPY30                                     | TYMS     | GNG11     | ZNF22   | TM4SF18  | CD63    | GRAP2     | GPR1     | HIST1H2BK | FBXO8     | PRKX     | LPAR6    | LXN      |
| CXCR4                                     | ITK      | RHOJ      | LBR     | KLF12    | NCBP2   | IFT52     | DMTF1    | RPA3      | RFC3      | DRAM1    | PCDHB1   | HBP1     |
| LCORL                                     | PROS1    | IRF2      | STT3A   | ADAMTS20 | SF3B1   | G3BP1     | PAPD4    | TFPI      | ILF2      | ZBTB26   | GXYLT1   | TCF19    |
| HS3ST3A1                                  | CDH11    | FGF10     | RNF122  | THG1L    | NLGN1   | TMEM39A   | DERL2    | DPEP1     | GPX7      | IL1RAP   | CETN2    | NOTCH2   |
| CCNB1                                     | NDC80    | ZMYM4     | DEPDC1B | CD9      | FAM172A | MNS1      | BIRC2    | STX10     | SOX21     | GABPB1   | CCR5     | TAL2     |
| ANAPC4                                    | ITGA2    | RNF139    | ZNF473  | CSE1L    | DCP2    | HNMT      | WDR38    | ISOC1     | ZC3H7A    | CMTM6    | SNRPD3   | CYP4F12  |
| LYAR                                      | MYC      | KBTBD2    | TFDP2   | VMAC     | SHFM1   | KPNA2     | PLS3     | SEC11A    | THOC2     | IL12A    | TMEM179B | RFC5     |
| WSCD1                                     | OIP5     | PDIA6     | FHL3    | CDC20    | RIT1    | TRA2B     | INTS12   | TAS2R13   | HIST1H2AE | NXT1     | GMNN     | COL1A2   |
| LRRN1                                     | CCNA2    | HIST1H3D  | GINS3   | WFDC13   | TMOD1   | HS3ST1    | AGA      | LAMB2     | ADIG      | MGARP    | SEMA5A   | ITGB5    |
| LHFPL2                                    | RPL27    | NONO      | LAPTM4A | SMAD4    | ARHGFE6 | ORAI3     | CER1     | RPS27L    | TNFSF10   | SNAPIN   | HIATL1   | GPR75    |
| BRCA1                                     | SP4      | MAGOH     | FCGR2B  | OSGEPL1  | TSSK1B  | FAM76B    | PTGER4   | PDCD1     | THBS3     | ANGPT1   | NLGN4Y   | RNASE4   |
| STX8                                      | DUSP10   | NREP      | TOP3B   | DKC1     | CLEC18A | TRAM1     | TMEM89   | OLFML3    | MRPS17    | MX2      | RFX4     | NEK2     |
| FPGT                                      | TWSG1    | GJC1      | CTDSPL2 | PPT1     | DAP     | NUP37     | NUP35    | FAM118B   | SDR42E1   | DPH5     | DDR1     | GINS4    |
| CDK1                                      | BANF1    | PTRH2     | FBXO22  | ELMOD2   | MCM6    | ZNF24     | CCDC167  | RASSF8    | NECAP2    | RXRG     | RPF1     | CKLF     |
| MLF1                                      | SLC25A24 | CCDC42    | TAGLN2  | RNF5     | FABP12  | ATF1      | XCL1     | LSM2      | LRRC69    | SREK1IP1 | SNRNP40  | CCDC65   |
| IPP                                       | ZNF287   | ADNP      | EZH2    | KLHL25   | GNPAT   | ARL6IP6   | IRAK1BP1 | LAP3      | CNN3      | SS18     | DBR1     | TP53INP1 |
| RHOH                                      | EIF2AK2  | UST       | CNKS3   | LIX1     | TCP11L2 | ZCCHC9    | GGH      | PPIC      | CXCL11    | IKZF2    | EBLN2    | XPO1     |
| IGSF11                                    | METTL18  | EIF3E     | COMMD2  | MCL1     | SNX24   | DHX15     | ZC4H2    | RAB9A     | MYL6      | MYD88    | TMSB4X   | GPR34    |
| HIST1H2BJ                                 | CBWD1    | KDEL2     | PGAP2   | GABPA    | PTPLAD2 | AAMDC     | FAM126A  | ZNF671    | SMC4      | CBFB     | CHAC2    | HPGDS    |
| RP9                                       | UNC119B  | IGFBP3    | IPO8    | TLR3     | MIOS    | NDNF      | PIIH     | TREML1    | PLXNC1    | ASPM     | EMILIN3  | ORMDL1   |
| ARHGAP15                                  | MT1E     | SFT2D2    | PPP1R8  | TPAR2    | IFT57   | PXMP2     | PHC1     | PIGC      | OGG1      | SERPINH1 | REXO2    | IMPACT   |
| DUSP18                                    | IFT172   | DEK       | ARF4    | CDC7     | IL20RB  | GANC      | CYP4F22  | TSHR      | LY6G6C    | LSM6     | CCL3     | SMCHD1   |
| LCA5L                                     | CLIC4    | SUCLG2    | SH3GLB1 | ISG15    | NR112   | PRIM2     | ACP5     | HCRT      | IFIT2     | RAP1B    | THAP6    | ZNF790   |
| MAD2L1                                    | FMO3     | HIST1H1D  | USP16   | CLDN12   | DNAJC24 | IFI16     | GTF2A2   | CYBRD1    | MAP2K6    | ATRAID   | IRAK4    | EDA2R    |
| NFE2L2                                    | GBE1     | SPRED2    | SCML2   | COL3A1   | NKX3-2  | LSM3      | RHOV     | TRAFD1    | PPP1CC    | SRSF10   | TULP3    | AMICA1   |
| IFI27                                     | CREB1    | KCTD3     | EFCAB7  | RBM12    | ATP5E   | MOSPD1    | NUPL2    | TRIM36    | FAM181B   | CALU     | SNAI2    | FAM5C    |
| HP                                        | GLT8D1   | COMMD6    | WDR5B   | SCYL2    | TM4SF19 | C1GALT1C1 | RPGRIP1L | SLC16A1   | CKS1B     | SAP30    | ATP6V0E1 | TIA1     |
| MAGOHB                                    | TMEM50B  | CASP4     | CBR4    | CRYGD    | STK38   | ZNF177    | SDHAF2   | PPM1D     | SNRPE     | TNFAIP8  | RFTN2    | TRIM22   |
| TNFAIP6                                   | FAIM     | HIST1H2BH | RPS13   | BST2     | TXNDC17 | FTSJD1    | METTL21B | VGLL4     | TAS2R46   | ANKRD50  | MAT2A    | UBE2E3   |
| SOX9                                      | TNFSF8   | HIST1H2BO | TMEM252 | CDO1     | RPL26L1 | PHOSPHO2  | PDLIM4   | SLC19A2   | CDK6      | CXCL9    | USP3     | GJA1     |
| IL23A                                     | TMEM126A | ATPBD4    | TMPO    | IFI6     | SMARCE1 | CCDC90B   | ZNF501   | PRCP      | P2RY1     | CHIC2    | PSMB9    | TIMM8B   |
| CENPL                                     | MFN1     | CHCHD2    | ZDHHC4  | ID4      | PAPOLB  | CD2       | ARFIP1   | NBN       | SNRPD1    | CA2      | CYP2R1   | TMEM231  |
| DTL                                       | EWSR1    | RBBP7     | FKBP10  | CENPM    | RBBP8   | CNIH4     | PCNA     | CCDC42B   | MCM4      | ILK      | MRPL53   | SKA2     |
| SLC16A4                                   | ZBED4    | FAM206A   | CGGBP1  | BTG3     | FBP1    | SLC35D1   | LMO2     | UBTD2     | LIPT2     | TCEA1    | KCNMB1   | HFE      |
| HIST1H2AC                                 | CRYBA2   | EGR2      | UBA3    | ZNF200   | EXTL2   | NCAPG2    | PHKA1    |           |           |          |          |          |

Supplemental Table 2: (ii<sub>b</sub>) GBM2 RNA-Seq and H3K4me3 ChIP-Seq

| Over-represented Functional categories of overlap genes in GBM2 RNA-Seq and ChIP-Seq, identified by Gene Ontology enrichment analysis using DAVID. |       |           |             |                                                                                                                                                                                                                                                                                                                                    |                 |             |             |             |
|----------------------------------------------------------------------------------------------------------------------------------------------------|-------|-----------|-------------|------------------------------------------------------------------------------------------------------------------------------------------------------------------------------------------------------------------------------------------------------------------------------------------------------------------------------------|-----------------|-------------|-------------|-------------|
| Term                                                                                                                                               | Count | %         | PValue      | Genes                                                                                                                                                                                                                                                                                                                              | Fold Enrichment | Bonferroni  | Benjamini   | FDR         |
| GO:0005694--chromosome                                                                                                                             | 33    | 7.5342466 | 1.24455E-07 | XPO1, HIST1H2AC, NBN, NEK2, HIST1H2AE, BANF1, RPA3, HIST1H2BO, HIST1H2BK, OIP5, EIF3E, PRIM2, HIST1H2BJ, SKA2, NUP37, CENPM, CENPL, HIST1H1D, SMCHD1, CREB1, HIST1H2BH, NDC80, BIRC2, BRCA1, SMC4, RFC5, RFC3, MAD2L1, SMARCE1, PCNA, HIST1H3D, TMPO, TOP3B                                                                        | 2.892648471     | 4.4305E-05  | 4.4305E-05  | 0.000170644 |
| GO:0005654--nucleoplasm                                                                                                                            | 48    | 10.958904 | 4.36027E-07 | NCBP2, CKS1B, XPO1, NBN, MCL1, STK38, SNRPD3, SHFM1, EZH2, SNRPD1, ATF1, RPA3, SAP30, SF3B1, DKC1, OIP5, EIF3E, PRIM2, GTF2A2, TFDP2, TCEA1, MYC, CCNA2, CDC7, CDK1, CREB1, GMNN, MAGOH, ANAPC4, SMAD4, INTS12, CDC20, IFI16, RBBP7, PPP1CC, MCM4, BRCA1, MCM6, RFC5, CCNB1, RFC3, PPIH, SMARCE1, PPP1R8, PCNA, OGG1, KPNA2, SNRPE | 2.194381854     | 0.000155213 | 7.76098E-05 | 0.00059785  |
| GO:0022402--cell cycle process                                                                                                                     | 35    | 7.9908676 | 3.4505E-06  | NBN, NEK2, CETN2, RHOV, MLF1, NCAPG2, OIP5, ILK, MNS1, NUP37, SKA2, HBP1, USP16, CCNA2, MYC, ASPM, MAP2K6, CDC7, CDK1, ANAPC4, CDK6, NDC80, CDC20, BRCA1, SMC4, RBBP8, PSMB9, CCNB1, NOTCH2, PPM1D, MAD2L1, IL12A, ID4, KPNA2, TP53INP1                                                                                            | 2.408096837     | 0.006736754 | 0.006736754 | 0.005918009 |
| GO:0044427--chromosomal part                                                                                                                       | 27    | 6.1643836 | 3.63844E-06 | XPO1, HIST1H2AC, NBN, HIST1H2AE, RPA3, HIST1H2BO, HIST1H2BK, OIP5, EIF3E, PRIM2, HIST1H2BJ, SKA2, NUP37, CENPM, CENPL, HIST1H1D, CREB1, HIST1H2BH, NDC80, BIRC2, SMC4, RFC5, RFC3, MAD2L1, PCNA, HIST1H3D, TMPO                                                                                                                    | 2.820434449     | 0.001294448 | 0.000431669 | 0.004988674 |
| GO:0007049--cell cycle                                                                                                                             | 42    | 9.5890411 | 8.3887E-06  | CKS1B, NBN, NEK2, CETN2, RHOV, MLF1, NCAPG2, OIP5, ILK, TFDP2, MNS1, NUP37, HBP1, SKA2, USP16, MYC, CCNA2, MAP2K6, ASPM, CDC7, CDK1, GMNN, ANAPC4, CDK6, NDC80, CDC20, PPP1CC, BRCA1, SMC4, PSMB9, MCM6, RBBP8, CCNB1, NOTCH2, PPM1D, MAD2L1, DMTF1, UBA3, IL12A, ID4, KPNA2, TP53INP1                                             | 2.103981514     | 0.016299231 | 0.008183097 | 0.014387002 |

**Supplemental Table 2: (iii<sub>a</sub>) GBM1 RNA-Seq, GBM2 RNA-Seq, and H3K4me3 ChIP-Seq**

| Overlap among GBM1 RNA-Seq, GBM2 RNA-Seq, and ChIP-Seq |          |          |         |         |          |          |
|--------------------------------------------------------|----------|----------|---------|---------|----------|----------|
| Total=134 Genes                                        |          |          |         |         |          |          |
| CXCR4                                                  | NEK2     | OLFML3   | LCA5L   | DNAJC24 | ATPBD4   | NDNF     |
| BRCA1                                                  | TFDP2    | TREML1   | MAGOHB  | NKX3-2  | RNASE4   | PRIM2    |
| FPGT                                                   | EZH2     | TSHR     | TNFAIP6 | SKA2    | IFI16    | XCL1     |
| CDK1                                                   | WDR5B    | AMICA1   | LXN     | CENPM   | PHOSPHO2 | METTL21B |
| MAD2L1                                                 | TMEM252  | TNFSF10  | TCF19   | TMEM39A | CD2      | TFPI     |
| HP                                                     | ADAMTS20 | LY6G6C   | CYP4F12 | ARL6IP6 | HPGDS    | DPEP1    |
| IL23A                                                  | TLR3     | CDK6     | ITK     | ZNF177  | EDA2R    | TAS2R13  |
| CENPL                                                  | COL3A1   | P2RY1    | NDC80   | CER1    | GPR1     | RPS27L   |
| PROS1                                                  | GIN54    | IL1RAP   | MYC     | CYP4F22 | WDR38    | PDCD1    |
| ITGA2                                                  | GPR34    | MGARP    | OIP5    | ACP5    | SEMA5A   | FCGR2B   |
| FMO3                                                   | RIT1     | SREK1IP1 | TWSG1   | RHOH    | EBLN2    | COMMD2   |
| SLC16A4                                                | TSSK1B   | ASPM     | METTL18 | ZNF501  | THAP6    | SCML2    |
| GJC1                                                   | CLEC18A  | SERPINH1 | TNFSF8  | LAMB2   | CCL3     | EGR2     |
| CCDC42                                                 | IL20RB   | TNFAIP8  | RHOJ    | SLC19A2 | IRAK4    | FKBP10   |
| HIST1H1D                                               | TM4SF19  | HFE      | COMMD6  | SDR42E1 | HS3ST3A1 | TM4SF18  |
| CASP4                                                  | PAPOLB   | DTL      | COL1A2  | LRRC69  | LYAR     | BST2     |
| HIST1H2BH                                              | GRAP2    | LPAR6    | DEPDC1B | CXCL11  | WSCD1    | TMOD1    |
| HIST1H2BO                                              | HNMT     | CCR5     | GIN53   | SMC4    | RHOH     | NR112    |
| TAS2R46                                                | KCNMB1   | ZBTB26   | ANGPT1  | CXCL9   | PCDHB1   | DBR1     |
| SNAI2                                                  |          |          |         |         |          |          |

**Supplemental Table 2: (iii<sub>b</sub>) GBM1 RNA-Seq, GBM2 RNA-Seq, and H3K4me3 ChIP-Seq**

| Over-represented Functional categories of overlap genes in GBM1 RNA-seq, GBM2 RNA-seq and ChIP-Seq, identified by Gene Ontology enrichment analysis using DAVID. |       |            |            |                                                                                                                              |                 |             |             |            |
|------------------------------------------------------------------------------------------------------------------------------------------------------------------|-------|------------|------------|------------------------------------------------------------------------------------------------------------------------------|-----------------|-------------|-------------|------------|
| Term                                                                                                                                                             | Count | %          | PValue     | Genes                                                                                                                        | Fold Enrichment | Bonferroni  | Benjamini   | FDR        |
| GO:0009611~response to wounding                                                                                                                                  | 17    | 13.3858268 | 2.6815E-06 | CCL3, COL3A1, CXCL9, ITGA2, TLR3, CXCL11, TNFAIP6, LAMB2, IL23A, IL20RB, CCR5, CXCR4, IL1RAP, P2RY1, TFPI, TREML1, PROS1     | 4.132542677     | 0.002816959 | 0.002816959 | 0.00426397 |
| GO:0006955~immune response                                                                                                                                       | 18    | 14.1732283 | 1.8769E-05 | CCL3, BST2, CXCL9, ACP5, HFE, TLR3, CXCL11, PDCD1, TNFSF8, TNFSF10, IL23A, IL20RB, FCGR2B, CCR5, CXCR4, IL1RAP, XCL1, TREML1 | 3.360993789     | 0.019551057 | 0.009823782 | 0.02984117 |

**Supplemental Table 2: (iv.) GBM1 RNA-Seq, GBM2 RNA-Seq, and Expressed ChIP-Seq**

| Overlap among Expressed ChIP-Seq and/or GBM1 RNA-Seq and GBM2 RNA-Seq |         |          |          |           |           |         |          |          |
|-----------------------------------------------------------------------|---------|----------|----------|-----------|-----------|---------|----------|----------|
| Total=404 Genes                                                       |         |          |          |           |           |         |          |          |
| ATPBD4                                                                | TWSG1   | HMGB1    | RNF14    | BANF1     | FAIM      | ITGB5   | ORMDL1   | SF3B1    |
| CDK6                                                                  | WDR5B   | IFNAR1   | RPL7L1   | BIRC2     | FAM118B   | KBTBD2  | PAPD4    | SFT2D2   |
| CENPL                                                                 | WSCD1   | INMT     | SAR1B    | BTG3      | FAM172A   | KCTD3   | PCNA     | SH3GLB1  |
| COMMD2                                                                | ZBTB26  | IRF3     | SCG2     | C1GALT1C1 | FAM206A   | KDEL2   | PDIA6    | SHFM1    |
| COMMD6                                                                | ZNF177  | JUN      | SGMS2    | CA2       | FAM5C     | KLF12   | PGAP2    | SLC16A1  |
| DBR1                                                                  | ZNF501  | KIAA0355 | SLC30A7  | CALU      | FAM76B    | KLHL25  | PHC1     | SLC35D1  |
| DNAJC24                                                               | ACVR1C  | KLHL28   | SLC31A1  | CCDC90B   | FGF10     | KPNA2   | PHKA1    | SMAD4    |
| FKBP10                                                                | ADAT1   | KRIT1    | SLC35E1  | CD63      | FTSJD1    | LAP3    | PIGC     | SMARCE1  |
| GIN5A                                                                 | ARL11   | LRAT     | SNAP23   | CD9       | G3BP1     | LAPTM4A | PLS3     | SMCHD1   |
| GJC1                                                                  | BBS5    | LRRCS7   | SNAPC1   | CDC7      | GABPA     | LBR     | PLXNC1   | SNAPIN   |
| GPR1                                                                  | BET1    | LSM5     | SPATS2L  | CDH11     | GABPB1    | LCORL   | POLR3B   | SNRNP40  |
| GPR34                                                                 | BVES    | LYRM2    | SPP1     | CDO1      | GANC      | LHFPL2  | PPIH     | SNRPD1   |
| HIST1H1D                                                              | CD3G    | LYZ      | SPRYD4   | CETN2     | GGH       | LIX1    | PPM1D    | SNRPD3   |
| HIST1H2BH                                                             | CHMP4C  | MAGEB10  | SSR3     | CGGBP1    | GJA1      | LMO2    | PPP1CC   | SNRPE    |
| HIST1H2BO                                                             | CMBL    | MAVS     | ST8SIA4  | CHCHD2    | GLT8D1    | LRRN1   | PPP1R8   | SNX24    |
| HNMT                                                                  | CRIP1   | MDM2     | SYNJ2BP  | CHIC2     | GMNN      | LSM2    | PPT1     | SOX9     |
| IFI16                                                                 | CTSC    | METAP2   | SYNRG    | CKS1B     | GNPAT     | LSM3    | PRCP     | SP4      |
| IL1RAP                                                                | CYP4V2  | METTL21A | TBCCD1   | CLDN12    | GPR75     | LSM6    | PRKX     | SPRED2   |
| IRAK4                                                                 | DCAF16  | METTL2A  | TCEANC2  | CLIC4     | GTF2A2    | MAGOH   | PTPLAD2  | SS18     |
| ITGA2                                                                 | DCLRE1C | MITF     | TM4SF20  | CMTM6     | GXYLT1    | MAP2K6  | PTRH2    | STK38    |
| LAMB2                                                                 | DFFA    | MME      | TMC7     | CNIH4     | HBP1      | MAT2A   | PXMP2    | STT3A    |
| LPAR6                                                                 | DTD2    | MSRB3    | TMEM106A | CNN3      | HIATL1    | MCL1    | RAB9A    | STX8     |
| LXN                                                                   | DTDW2   | MTAP     | TOR1AIP2 | CREB1     | HIST1H2AC | MCM4    | RAP1B    | SUCLG2   |
| LYAR                                                                  | DUSP19  | MTF1     | TRIM45   | CSE1L     | HIST1H2AE | MFN1    | RASSF8   | TAL2     |
| METTL18                                                               | EIF5A2  | NAIF1    | TRMT10B  | CTDSPL2   | HIST1H2BJ | MIOS    | RBBP7    | TCEA1    |
| METTL21B                                                              | EYA3    | NANP     | UGDH     | CYBRD1    | HIST1H2BK | MLF1    | RBM12    | TCP11L2  |
| NEK2                                                                  | FAM115C | NRP1     | UTP23    | DCP2      | ID4       | MNS1    | REXO2    | THBS3    |
| P2RY1                                                                 | FAM126B | NUDT7    | WDR55    | DDR1      | IFI6      | MOSPD1  | RFC5     | THOC2    |
| PHOSPHO2                                                              | FAM161A | OPA3     | WSB1     | DEK       | IFIT2     | MRPL53  | RFTN2    | TIA1     |
| PRIM2                                                                 | FAM200A | PATE4    | ZNF250   | DERL2     | IFT172    | MRPS17  | RFX4     | TIMM8B   |
| RHOA                                                                  | FAM20C  | PDP2     | ZNF345   | DHX15     | IFT52     | MT1E    | RNF139   | TMEM126A |
| RIT1                                                                  | FBXO32  | PDSS2    | ZNF805   | DKC1      | IFT57     | MYL6    | RP9      | TMEM231  |
| RPS27L                                                                | FCAR    | PEX13    | AAMDC    | DMTF1     | IGSF11    | NBN     | RPA3     | TMEM50B  |
| SDR42E1                                                               | FCF1    | PIGW     | ADNP     | DPH5      | IKZF2     | NCAPG2  | RPF1     | TMPO     |
| SEMA5A                                                                | FKBP14  | POU5F1   | ANAPC4   | DPY30     | ILF2      | NCBP2   | RPGRIP1L | TMSB4X   |
| SKA2                                                                  | FZD3    | QPCTL    | ANKRD50  | DUSP10    | ILK       | NECAP2  | RPL26L1  | TP53INP1 |
| SLC16A4                                                               | GADD45B | QTRTD1   | ARF4     | DUSP18    | IMPACT    | NFE2L2  | RPL27    | TRA2B    |
| SLC19A2                                                               | GGPS1   | RABL5    | ARFIP1   | EFCAB7    | INTS12    | NLGN1   | RPS13    | TRAFD1   |
| SREK1IP1                                                              | GNB4    | RAD1     | ARHGEF6  | EIF2AK2   | IPO8      | NONO    | RXRG     | TRAM1    |
| TFDP2                                                                 | GNRH2   | RBM34    | ATF1     | EIF3E     | IPP       | NOTCH2  | SAP30    | TRIM22   |
| THAP6                                                                 | GNRHR2  | RGS2     | ATP5E    | ELMOD2    | IRAK1BP1  | NREP    | SCYL2    | TULP3    |
| TMOD1                                                                 | GOSR1   | RHBG     | ATP6V0E1 | EWSR1     | IRF2      | NUP35   | SDHAF2   | UBA3     |
| TNFSF10                                                               | GPR85   | RIOK2    | ATRAID   | EXTL2     | ISOC1     | OGG1    | SEC11A   | UBE2E3   |
| UBTD2                                                                 | USP3    | VGLL4    | XPO1     | ZC3H7A    | ZCCHC9    | ZNF22   | ZNF287   | ZNF790   |
| USP16                                                                 | UST     | VMAC     | ZBED4    | ZC4H2     | ZMYM4     | ZNF24   | ZNF671   |          |



**Supplemental Table 2: (iv<sub>b</sub>) GBM1 RNA-Seq, GBM2 RNA-Seq, and Non-expressed ChIP-Seq**

| Overlap among Non-expressed ChIP-Seq and/or GBM1 RNA-Seq and GBM2 RNA-Seq |          |          |         |          |          |          |          |          |
|---------------------------------------------------------------------------|----------|----------|---------|----------|----------|----------|----------|----------|
| Total=280 Genes                                                           |          |          |         |          |          |          |          |          |
| ACPS5                                                                     | FMO3     | SCML2    | CCL11   | GPX6     | OR13A1   | SPEM1    | DAP      | PPIC     |
| ADAMTS20                                                                  | FPGT     | SERPINH1 | CCR6    | H2BFWT   | OR13C8   | SPINK9   | DRAM1    | PSMB9    |
| AMICA1                                                                    | GINS3    | SMC4     | CD28    | HNF1B    | OR14J1   | STAC3    | EMILIN3  | PTGER4   |
| ANGPT1                                                                    | GRAP2    | SNAI2    | CDNF    | IDO1     | OR1F1    | STOML3   | FABP12   | RBBP8    |
| ARL6IP6                                                                   | HFE      | TAS2R13  | CESS5A  | IGJ      | OR1Q1    | TACR3    | FAM126A  | RFC3     |
| ASPM                                                                      | HP       | TAS2R46  | CLCA1   | IL15     | OR2A2    | TAS2R39  | FAM181B  | RNF122   |
| BRCA1                                                                     | HPGDS    | TCF19    | CLDN1   | IL17F    | OR2D3    | TCF21    | FBP1     | RNF5     |
| BST2                                                                      | HS3ST3A1 | TFPI     | CLDN14  | IL1B     | OR52W1   | TLR5     | FBXO22   | SLC25A24 |
| CASP4                                                                     | IL20RB   | TLR3     | CXCR3   | IL3      | OR5K1    | TMEM196  | FBXO8    | SOX21    |
| CCDC42                                                                    | IL23A    | TM4SF18  | CYP2C18 | JRKL     | OR6C4    | TMEM27   | FHL3     | SRSF10   |
| CCL3                                                                      | ITK      | TM4SF19  | DCAF4L2 | KIR3DL2  | OR6X1    | TMEM45B  | GBE1     | STX10    |
| CCR5                                                                      | KCNMB1   | TMEM252  | DCAF8L2 | KRTAP4-1 | OSM      | TPH2     | GNG11    | TAGLN2   |
| CD2                                                                       | LCA5L    | TMEM39A  | DPP4    | LBX1     | OTX2     | TTR      | GPX7     | THG1L    |
| CDK1                                                                      | LRR69    | TNFAIP6  | DUOXA2  | LCN9     | PAX9     | VRTN     | HCRT     | TMEM179B |
| CENPM                                                                     | LY6G6C   | TNFAIP8  | EDNRA   | LDHAL6B  | PCP2     | ADIG     | HIST1H3D | TMEM89   |
| CER1                                                                      | MAD2L1   | TNFSF8   | ELF5    | LECT2    | PI15     | AGA      | HS3ST1   | TOP3B    |
| CLEC18A                                                                   | MAGOHB   | TREML1   | F10     | LEPR     | PIWIL1   | ARHGAP15 | IFI27    | TRIM36   |
| COL1A2                                                                    | MGARP    | TSHR     | F7      | LEPRE1   | PLG      | CBFB     | IGFBP3   | TXNDC17  |
| COL3A1                                                                    | MYC      | TSSK1B   | FAM105A | LILRA1   | PPP3R2   | CBR4     | IL12A    | TYMS     |
| CXCL11                                                                    | NDC80    | WDR38    | FAM83B  | MAGEC2   | PRL      | CBWD1    | ISG15    | UNC119B  |
| CXCL9                                                                     | NDNF     | XCL1     | FAM83C  | MC5R     | PRSS37   | CCDC167  | LIPT2    | WFDC13   |
| CXCR4                                                                     | NKX3-2   | ABCC13   | FCGR2A  | METTL15  | PTGFR    | CCDC42B  | LPAR2    | ZDHHC4   |
| CYP4F12                                                                   | NR1I2    | ABCC2    | FMO2    | METTL20  | PTPN22   | CCDC65   | MCM6     | ZNF200   |
| CYP4F22                                                                   | OIP5     | ACTL9    | FNDC8   | NAA38    | RAB27A   | CCNA2    | MX2      | ZNF473   |
| DEPDC1B                                                                   | OLFML3   | AGR2     | FOXA3   | NAT2     | REN      | CCNB1    | MYD88    |          |
| DPEP1                                                                     | PAPOLB   | AKAP2    | FOXP3   | NEUROG2  | RS1      | CDC20    | NLGN4Y   |          |
| DTL                                                                       | PCDHB1   | APOBEC3A | GIPC3   | NFE2     | SERPINC1 | CHAC2    | NUP37    |          |
| EBLN2                                                                     | PDCD1    | AQP3     | GK2     | NPSR1    | SLC25A21 | CKLF     | NUPL2    |          |
| EDA2R                                                                     | PROS1    | ATF3     | GLYAT   | NPVF     | SLC25A31 | CNKSR3   | NXT1     |          |
| EGR2                                                                      | RHOH     | BARX2    | GLYATL3 | ODAM     | SLC6A4   | CRYBA2   | ORAI3    |          |
| EZH2                                                                      | RHOJ     | CAV3     | GPHA2   | OGN      | SLCO1B3  | CRYGD    | OSGEPL1  |          |
| FCGR2B                                                                    | RNASE4   | CCDC172  | GPX5    | OR10Q1   | SNX20    | CYP2R1   | PDLIM4   |          |
